# Supplementary material for: Protocol for the Gut Bugs Trial: a randomised double-blind placebo-controlled trial of gut microbiome transfer for the treatment of obesity in adolescents
Source: PubMed Central journal article supplement — BMJ Open. 2019 Apr 20;9(4):e026174. doi: 10.1136/bmjopen-2018-026174 (PMC6500264; doi:10.1136/bmjopen-2018-026174), 2019-04-20
Supplement: bmjopen-2018-026174.draft_revisions.pdf [file bmjopen-2018-026174.draft_revisions.pdf]

# BMJ Open

BMJ Open is committed to open peer review. As part of this commitment we make the peer review history of every article we publish publicly available.

When an article is published we post the peer reviewers' comments and the authors' responses online. We also post the versions of the paper that were used during peer review. These are the versions that the peer review comments apply to.

The versions of the paper that follow are the versions that were submitted during the peer review process. They are not the versions of record or the final published versions. They should not be cited or distributed as the published version of this manuscript.

BMJ Open is an open access journal and the full, final, typeset and author-corrected version of record of the manuscript is available on our site with no access controls, subscription charges or pay-per-view fees (<http://bmjopen.bmj.com>).

If you have any questions on BMJ Open's open peer review process please email [info.bmjopen@bmj.com](mailto:info.bmjopen@bmj.com)

# BMJ Open

## Rationale and design of the Gut Bugs Trial: a randomised double-blind placebo-controlled trial of gut microbiome transfer for the treatment of obesity in adolescents

|                               |                                                                                                                                                                                                                                                                                                                                                                                                                                                                                                                                                                                                                                                                                                                                                                                                                                                                                                                                                                                                                                                                                                                          |
|-------------------------------|--------------------------------------------------------------------------------------------------------------------------------------------------------------------------------------------------------------------------------------------------------------------------------------------------------------------------------------------------------------------------------------------------------------------------------------------------------------------------------------------------------------------------------------------------------------------------------------------------------------------------------------------------------------------------------------------------------------------------------------------------------------------------------------------------------------------------------------------------------------------------------------------------------------------------------------------------------------------------------------------------------------------------------------------------------------------------------------------------------------------------|
| Journal:                      | <i>BMJ Open</i>                                                                                                                                                                                                                                                                                                                                                                                                                                                                                                                                                                                                                                                                                                                                                                                                                                                                                                                                                                                                                                                                                                          |
| Manuscript ID                 | bmjopen-2018-026174                                                                                                                                                                                                                                                                                                                                                                                                                                                                                                                                                                                                                                                                                                                                                                                                                                                                                                                                                                                                                                                                                                      |
| Article Type:                 | Protocol                                                                                                                                                                                                                                                                                                                                                                                                                                                                                                                                                                                                                                                                                                                                                                                                                                                                                                                                                                                                                                                                                                                 |
| Date Submitted by the Author: | 24-Aug-2018                                                                                                                                                                                                                                                                                                                                                                                                                                                                                                                                                                                                                                                                                                                                                                                                                                                                                                                                                                                                                                                                                                              |
| Complete List of Authors:     | <p>Leong, Karen; University of Auckland, Liggins Institute<br/> Vidanelage, Thilini ; University of Auckland, Liggins Institute<br/> Derraik, José; University of Auckland, Liggins Institute<br/> Albert, Benjamin; University of Auckland, Liggins Institute<br/> Chiavaroli , Valentina ; University of Auckland, Liggins Institute<br/> Svirskis, Darren; School of Pharmacy, Faculty of Medical and Health Sciences, University of Auckland, Private Bag 92019, Auckland 1142, New Zealand<br/> Beck, Kathryn; Massey University, School of Sport Exercise and Nutrition<br/> Conlon, Cathryn; Massey University, School of Sport Exercise and Nutrition<br/> Jiang, Yannan; The University of Auckland, Dept of Statistics<br/> Schierding , William ; University of Auckland, Liggins Institute<br/> Vatanen, Tommi; University of Auckland, Liggins Institute<br/> Holland , David ; Counties Manukau District Health Board, Department of Infectious Diseases<br/> O'Sullivan, Justin ; University of Auckland, Liggins Institute<br/> Cutfield, Wayne; University of Auckland, Liggins Institute and NRCGD</p> |
| Keywords:                     | Obesity, Paediatric endocrinology < DIABETES & ENDOCRINOLOGY, MICROBIOLOGY, Adolescents, Clinical trials < THERAPEUTICS                                                                                                                                                                                                                                                                                                                                                                                                                                                                                                                                                                                                                                                                                                                                                                                                                                                                                                                                                                                                  |
|                               |                                                                                                                                                                                                                                                                                                                                                                                                                                                                                                                                                                                                                                                                                                                                                                                                                                                                                                                                                                                                                                                                                                                          |

SCHOLARONE™  
Manuscripts

1  
2  
3 **Rationale and design of the Gut Bugs Trial: a randomised double-**  
4 **blind placebo-controlled trial of gut microbiome transfer for the**  
5 **treatment of obesity in adolescents**  
6  
7  
8  
9

10  
11 Karen S W Leong<sup>1,2</sup>, Thilini N Jayasinghe<sup>1</sup>, José G B Derraik<sup>1,2,3</sup>, Benjamin B Albert<sup>1,2</sup>,  
12 Valentina Chiavaroli<sup>1</sup>, Darren M Svirskis<sup>4</sup>, Kathryn L Beck<sup>5</sup>, Cathryn A Conlon<sup>5</sup>, Yannan  
13 Jiang<sup>6</sup>, William Schierding<sup>1</sup>, Tommi Vatanen<sup>1,7</sup>, David J Holland<sup>8</sup>, Justin M O'Sullivan<sup>1,2†</sup>,  
14 Wayne S Cutfield<sup>1,2†</sup>  
15  
16  
17  
18

19 <sup>1</sup> Liggins Institute, University of Auckland, Auckland, New Zealand.

20 <sup>2</sup> A Better Start – National Science Challenge, University of Auckland, Auckland, New Zealand.

21 <sup>3</sup> Department of Women's and Children's Health, Uppsala University, Uppsala, Sweden.

22 <sup>4</sup> School of Pharmacy, Faculty of Medical and Health Sciences, University of Auckland, Auckland,  
23 New Zealand.

24 <sup>5</sup> School of Sport Exercise and Nutrition, College of Health, Massey University, Auckland, New  
25 Zealand.

26 <sup>6</sup> Department of Statistics, University of Auckland, Auckland, New Zealand.

27 <sup>7</sup> Broad Institute of MIT and Harvard, Cambridge, Massachusetts, USA.

28 <sup>8</sup> Department of Infectious Diseases, Counties Manukau District Health Board, Auckland, New Zealand.

29 <sup>†</sup>JM O'Sullivan and WS Cutfield contributed equally to the study.  
30  
31  
32  
33  
34  
35  
36  
37

38 Corresponding author: Professor Wayne Cutfield, Liggins Institute, University of Auckland, Private  
39 Bag 92019, Auckland, New Zealand; e-mail w.cutfield@auckland.ac.nz; ph +64.9.923.4476; fax  
40 +64.9.373.8763.  
41  
42  
43

44 **Competing interests:** The authors have no financial conflicts of interest to disclose that may be  
45 relevant to this work. The funders had no role in study design, decision to publish, or preparation of this  
46 manuscript.  
47  
48  
49

50 **Word count:** 4,146  
51  
52  
53  
54  
55  
56  
57  
58  
59  
60

## ABSTRACT

**Introduction:** Animal studies showed that germ-free mice inoculated with normal mouse gut bacteria developed obesity, insulin resistance, and higher triglyceride levels, despite similar food intake. In humans, an association has been found between obesity and gut microbiome dysbiosis. However, gut microbiome transfer has not been evaluated for the treatment of human obesity. We will examine the effectiveness of gut microbiome transfer using encapsulated material for the treatment of obesity in adolescents.

**Methods and analysis:** A two-arm, double-blind, placebo-controlled, randomised clinical trial of a single course of gut microbiome transfer will be conducted in 80 obese (BMI  $\geq 30$  kg/m<sup>2</sup>) adolescents (males and females, aged 14–18 years) in Auckland, New Zealand. Healthy lean donors (males and females, aged 18–28 years) will provide fresh stool samples from which bacteria will be isolated and double encapsulated. Participants (recipients) will be randomised at 1:1 to control (placebo) or treatment (gut microbiome transfer), stratified by sex. Recipients will receive 28 capsules over two consecutive mornings (~14 ml of frozen microbial suspension or saline). Clinical assessments will be performed at baseline, 6, 12, and 26 weeks, and will include: anthropometry, blood pressure, fasting metabolic markers, dietary intake, physical activity levels, and health-related quality of life. Insulin sensitivity (Matsuda index), gut microbiota population structure characterized by 16S rRNA amplicon sequencing, and body composition (DXA) will be assessed at baseline, 6, 12, and 26 weeks. 24-hour ambulatory blood pressure monitoring will be performed at baseline and at 6 weeks. The primary outcome is BMI standard deviation scores (SDS) at 6 weeks, with BMI SDS at 12 and 26 weeks as secondary outcomes. Other secondary outcomes include insulin sensitivity, adiposity (total body fat percentage), and gut microbial composition at 6, 12, and 26 weeks. Statistical analysis will be performed on the principle of intention to treat.

**Ethics and dissemination:** Ethics approval was provided by the Northern A Health and Disability Ethics Committee (HDEC) (Ministry of Health, New Zealand; 16/NTA/172). The trial results will be published in peer-reviewed journals and presented at international conferences.

**Trial registration number:** ACTRN12615001351505p.

### Strengths of this study

- This is the largest registered randomised clinical trial of gut microbiome transfer for obesity or insulin resistance in children or adults.
- The double-blind, placebo-controlled design, use of capsules as a non-invasive method of delivery, and characterisation of bacterial diversity and viability in donor stools are main strengths of this randomised clinical trial.
- Conducting a 6-month follow-up after a single treatment with gut microbiome will allow identification of a possible lag between treatment and change in BMI.
- This study is adequately powered to show a meaningful reduction in BMI SDS in the treated group.

### Limitations of this study

Our study will focus on obese adolescents, so that the findings may not be readily extrapolated to individuals with lesser degrees of adiposity or to older adults.

## INTRODUCTION

New paradigms on the causes of obesity incorporate a pivotal role for the gut microbiota (*i.e.* the microbial community present in the gastrointestinal tract). In recent years, assessments of the gut microbiome (all of the genes inside these gut microbiota cells) have identified reduced diversity of bacterial taxa as having an important effect on the development of obesity, insulin resistance, and diabetes mellitus<sup>1,2</sup>. The concept that the gut microbiome influences host metabolism and adiposity was introduced through gut microbiome transfer experiments in gnotobiotic (*i.e.* germ-free) mice<sup>3,4</sup>. These gnotobiotic mice have sterile colons and 40% less body fat than conventional mice, despite a food intake that is 29% higher<sup>3</sup>. When germ-free mice were inoculated with normal mouse gut bacteria, they developed obesity, insulin resistance, and increased triglycerides levels, while on the same food intake<sup>5</sup>. Further experiments showed that the gut microbiome modulates both sides of the energy balance equation by: (i) increasing energy yield from the diet stored as triglycerides; and (ii) altering energy expenditure via fatty acid oxidation<sup>4,6,7</sup>. These effects occur either directly within the bowel, or indirectly through the effects of bacterial products that enter the circulation. Current literature indicates that changes to the gut microbiome and their respective products within the host circulation (*e.g.* lipopolysaccharides and short-chain fatty acids) can alter host responses, modulate insulin resistance, adiposity, and atherosclerosis and have an effect on the development of non-alcoholic fatty liver disease<sup>8,9</sup>.

1  
2  
3 Gut microbiome transfer is now regularly used to treat recurrent or refractory *Clostridium difficile*  
4 colitis, which is associated with considerable morbidity and a reported 38% mortality<sup>10</sup>. Other treatment  
5 regimens for this disorder have relied on repeated courses of vancomycin, typically with low cure rates  
6 (~31%)<sup>11</sup>. By contrast, a single naso-duodenal infusion of a 'healthy' gut microbiome in elderly patients  
7 with chronic *C. difficile* colitis led to cure in 81% of subjects<sup>11</sup>. This<sup>11</sup> and other studies<sup>12-14</sup> have  
8 demonstrated that gut microbiome transfer is a viable treatment option for recurrent or refractory *C.*  
9 *difficile* colitis, without any noticeable side effects. Studies have confirmed that 6 weeks after gut  
10 microbiome transfer, the recipient's gut microbiome population structure resembles that of the donor<sup>15</sup>.

11  
12  
13  
14  
15  
16 Gut microbiome transfer is a possible treatment for obesity and metabolic syndrome<sup>16</sup>. To date,  
17 investigation of the therapeutic benefit of gut microbiome transfer in adult metabolic disease (obesity  
18 and metabolic syndrome) has been limited<sup>14</sup>. Vrieze et al. performed a short-term gut microbiome  
19 transfer study in 9 treated and 9 control middle-aged adults with metabolic syndrome<sup>14</sup>. Six weeks after  
20 gut microbiome transfer via naso-duodenal tube, treated recipients had an impressive 75% improvement  
21 in insulin sensitivity. This indirectly indicates that it is possible to change the gut microbiome, using a  
22 healthy donor, with concurrent health benefits.

23  
24  
25  
26  
27  
28 Selection of donors is critical for successful gut microbiome transfer. The adverse effect of an  
29 inappropriate donor was illustrated by a patient with chronic *C. difficile* colitis, who developed new-  
30 onset obesity following gut microbiome transfer from a healthy but overweight donor<sup>17</sup>. Notably, a  
31 similar result was observed when the microbiome from an obese human was transferred into a lean  
32 mouse<sup>18</sup>.

33  
34  
35  
36  
37 Gut microbiome transfer is not considered a probiotic treatment<sup>19</sup>. Although gut microbiome transfer  
38 and probiotics involve the administration of live bacteria, this is where the similarities end. Probiotics  
39 are one of several defined live bacterial strains (e.g. *Bifidobacterium adolescentis*, *Lactobacillus*  
40 *acidophilus*, and *Lactobacillus casei*) that have been previously isolated and characterised<sup>19</sup>. The  
41 rationale for this treatment is that these supplemental bacteria and products have been shown to confer  
42 general health benefits. Conversely, gut microbiome transfer consists of transferring the entire  
43 microbiome from a healthy donor to a recipient, in order to establish a healthier microbial community  
44 and ameliorate the undesirable underlying condition. Meta-analyses of randomised control studies of  
45 the effects of probiotics (e.g. *Lactobacillus* spp. and fermented milk-based probiotic treatments) on  
46 weight loss are conflicting<sup>20 21</sup>. There are currently no published studies of gut microbiome transfer for  
47 the treatment of human obesity. However, a study has shown that germ-free mice lose weight following  
48 gut microbiome transfer from mice who had gastric bypass surgery and exhibited rapid weight loss<sup>22</sup>. In  
49 addition, meta-analyses of the effectiveness of microbial transfers in the treatment of *C. difficile*<sup>23</sup> have  
50 demonstrated that gut microbiome transfer is efficacious and safe for inflammatory bowel disease  
51  
52  
53  
54  
55  
56  
57  
58  
59

(pooled cure rate 36%; 95% CI 17–60%)<sup>24</sup> and *C. difficile* (pooled cure rate 89%; 95% CI 84–93%)<sup>23</sup>. As such, gut microbiome transfer holds significant promise as a treatment for the rapid and concerted modification of an unhealthy gut microbiome, which we hypothesise will lead to weight loss in obese humans.

There is an increasing prevalence of obesity amongst children and adolescents<sup>25</sup>. Obesity tracks and amplifies through life<sup>26 27</sup>, and childhood obesity is associated with even greater severity of obesity and related co-morbidities in adulthood<sup>26 28</sup>. An elevated body mass index (BMI) in adolescence is associated with an increased all-cause mortality in adult life, and it is more predictive of later mortality than an elevated adult BMI<sup>29 30</sup>. This clinical trial will assess whether gut microbiome transfer using encapsulated material is an effective treatment for obesity in adolescents.

## METHODS AND ANALYSIS

### Study design

A two-arm, double-blind, placebo-controlled, randomised clinical trial with obese adolescents randomly assigned to either treatment (encapsulated gut microbiome) or placebo (encapsulated saline solution), stratified by sex. Eligible participants will be followed for 26 weeks post randomisation (Figure 1).

### Recruitment and eligibility criteria

#### *Donors*

We will recruit 8 donors (4 males and 4 females), as recipients will only receive gut microbiome from donors of the same sex. This is to enhance microbial variability and standardise the treatment via gut microbiome transfer. Donors will be selected based on strict inclusion criteria (Table 1). Eligible donors will be identified by word of mouth, the internal email system at the University of Auckland, and social media networks. Potential donors will be given a detailed information sheet about the study that includes a consent form.

To eliminate the risks of transmission of infectious diseases we will use screening procedures equivalent to those used for blood donation in New Zealand<sup>31</sup>, and also screen donors for potential faecal pathogens or multidrug-resistant organisms. As part of this regimen, all potential donors will undergo extensive testing for human pathogens, antigens, and antibodies (that indicate exposure to hepatitis A, B, or C viruses, and human immunodeficiency virus), syphilis, *C. difficile*, *Helicobacter pylori*, other bacterial and viral pathogens, multidrug-resistant organisms, as well as intestinal parasites. We will supplement these microbiological tests with characterisation of the gut microbiome through

1  
2 analysis of the metagenome and metatranscriptome<sup>32</sup>. In addition, we will conduct an interview to  
3 gather information about behaviours or activities that may exclude them from the trial (Table 1).  
4  
5

6  
7 Given evidence that irritable bowel syndrome (IBS) may be related to the gut microbiome, it is  
8 important to exclude potential donors who may have IBS. The Rome criteria are an accepted clinical  
9 tool to identify individuals with IBS, but they are relatively insensitive so that strict adherence to those  
10 criteria would potentially allow for individuals with mild IBS to donate<sup>33</sup>. Therefore, we will screen for  
11 IBS using a conservative modification of the Rome criteria, where we define a positive screen as having  
12 3 or more episodes of abdominal pain per month as described in part I of the criteria, as well as an  
13 additional symptom as defined in part II<sup>34</sup>.  
14  
15  
16  
17

18  
19 Each donor is expected to produce a wet stool sample weighing 100-150 g. Our preliminary laboratory  
20 data indicate that an average stool sample from a donor will generate sufficient gut microbiome material  
21 for two same-sex recipients. Stool samples will be collected and immediately processed for  
22 encapsulation. Capsules from each sample will be individually coded, so that each recipient will receive  
23 an equal number of capsules (n=7) from each of the four same sex donors.  
24  
25  
26

### 27 *Participants (recipients)*

28  
29 We will recruit 80 obese adolescents as per inclusion and exclusion criteria described in Table 2.  
30 Eligible recipients will be recruited via social media, word of mouth, and paediatric endocrinology  
31 clinics in Auckland. Potential recipients and caregivers will be given a detailed information sheet about  
32 the study that includes a consent form.  
33  
34  
35  
36  
37

### 38 **Specimen collection**

39  
40 The donor gut microbiome will be double encapsulated and administered to recipients by the oral route,  
41 which delivers bacteria to the proximal bowel. Thus, we will not require the use of invasive techniques  
42 (*i.e.* naso-duodenal tube) for gut microbiome transfer. Instead, gut microbiome transfer will be  
43 performed as per recent studies<sup>12 13</sup>, which demonstrated that an encapsulated microbiome was a viable  
44 treatment option for recurrent or refractory *C. difficile* colitis, without noticeable side effects.  
45  
46  
47  
48  
49

50 We have validated methods for gut microbiome isolation, preparation, and double encapsulation as  
51 detailed by Youngster et al.<sup>12</sup>. Briefly, immediately after donation, stools are placed in normal saline,  
52 blended, and sieved to remove particulate matter. Samples are then differentially centrifuged to isolate a  
53 bacterial pellet. The bacterial pellet is suspended in normal saline (containing 15% glycerol – a  
54 cryoprotectant) at 0.5 g wet weight/ml before being dispensed into size 0 DRcaps<sup>TM</sup> capsules (Capsugel  
55  
56  
57  
58  
59  
60



1  
2 Inc, Sydney, Australia). The size 0 capsules are closed and secondarily sealed in size 00 DRcaps<sup>TM</sup>  
3 capsules. These capsules mask taste, odour, and visual appearance, and are designed to remain intact  
4 during passage through the stomach, delivering their contents to the intestine<sup>35-37</sup>. Capsules are stored  
5 frozen at -80°C.  
6  
7

8  
9  
10 The use of low-speed centrifugation to pellet the bacterial cells is a feature of this methodology that  
11 reduces the risk of having free viruses<sup>38</sup> included into the treatment capsules. Storage (-80°C, <175  
12 days<sup>12 13</sup>) of microbiome capsules provides time to complete rigorous safety testing using  
13 microbiological and microscopic analyses.  
14  
15

### 16 17 **Randomisation, allocation, and blinding**

18

19  
20 Eligible participants will be randomised in a 1:1 ratio to either treatment or placebo group, stratified by  
21 sex, using block randomisation with variable block sizes of 2 and 4<sup>39</sup>. Randomisation sequences will be  
22 computer generated, and overseen by the biostatistician. Researchers and participants will be blinded to  
23 capsule contents, both of which (placebo and gut microbiome) look identical (white).  
24  
25

26  
27 There are three steps in the blinding and allocation process. First, the independent research nurse  
28 allocates the recipient to group A or B using the randomisation sequence. Second, the placebo and  
29 treatment capsule packs each have a unique code (assigned by the technician who encapsulated them).  
30 Lastly, the independent research nurse allocates the pack according to the unique code associated with  
31 the randomisation sequence.  
32  
33

34  
35 To maintain the integrity of the trial evaluation, statistical analyses will be performed at the completion  
36 of the study on encoded data (*i.e.* Group A vs Group B), so that the biostatistician will be blinded to  
37 treatment allocation. Recipients will be asked if they are able to identify the contents of capsules taken  
38 (*i.e.* placebo or gut microbiome) at 6 weeks and 26 weeks. The effectiveness of treatment blinding will  
39 be assessed using the Bang's blinding index<sup>40</sup>. Blinding success will be determined by the thresholds of  
40 Moroz et al.<sup>41</sup>: unblinded ( $BBI \geq 0.2$ ); random guesses ( $-0.2 < BBI < 0.2$ ); or opposite guesses ( $BBI \leq$   
41  $-0.2$ ).  
42  
43  
44  
45  
46  
47

### 48 **Study intervention**

49

50  
51 All recipients will undergo bowel cleansing prior to treatment using an oral solution containing 70 g of  
52 Glycoprep-C<sup>®</sup> (active ingredient macrogol 3350) (Fresenius Kabi Australia Pty Ltd., Mount Kuring-gai,  
53 Australia). Bowel cleansing reduces gut microbial population by 31-fold and markedly reduces bacterial  
54 diversity<sup>42</sup>. This procedure was used in a pilot study of gut microbiome transfer in adults with type 2  
55  
56  
57  
58  
59

1  
2 diabetes<sup>14</sup>. Diminishing the undesirable microbial community means that the donor bacteria are more  
3 likely to become established in the recipient's bowel<sup>14</sup>.  
4  
5

6  
7 Recipients will be advised to take the Glycoprep-C<sup>®</sup> solution between 4 pm and 6 pm the day before the  
8 treatment begins. It is expected that watery stools will follow for several hours to achieve bowel  
9 cleansing. Recipients will attend clinic early next morning, when each recipient in the placebo group  
10 will ingest saline capsules, while those in the treatment group will receive gut microbiome capsules.  
11 Each recipient will receive a total of 28 capsules (approximately 14 ml of frozen microbial suspension  
12 or saline) administered over two consecutive mornings under direct supervision from research staff<sup>12</sup>,  
13 specifically 16 capsules in the first morning and 12 capsules in the second morning. Recipients will be  
14 fasting overnight for at least 8 hours prior to taking each set of capsules at clinic in the following  
15 morning. Capsules will be stored at -80°C, and later transferred into a freezer at -30°C in the morning of  
16 administration. Immediately before administration, treatment capsules will be placed onto gel packs at  
17 4°C to prevent harm to recipients upon swallowing. After treatment, all recipients will remain fasting  
18 for another 2 hours. Recipients will be advised not to change their diet, physical activity, and behaviour  
19 during the trial.  
20  
21  
22  
23  
24  
25

## 26 27 **Data collection and follow-up**

### 28 29 *Timing of assessments*

30  
31 Recipients will be assessed four times over the course of the study: at baseline, 6 weeks, 12 weeks, and  
32 26 weeks. Longitudinal follow-up over a six-month period will establish the duration of the effect. The  
33 specific assessments that will be carried out at each time point are outlined in Table 3. Treatment (*i.e.*  
34 intake of capsules) will be administered within a week of the baseline assessment.  
35  
36  
37  
38  
39  
40

41 Clinical assessments will start between 07:00 am and 09:00 am at the Maurice & Agnes Paykel Clinical  
42 Research Unit (Liggins Institute, University of Auckland), after an overnight fast and no strenuous  
43 activity over the previous 24 hours.  
44  
45

### 46 47 *Insulin sensitivity and other blood tests*

48  
49 Insulin sensitivity will be assessed in all recipients using the Matsuda index from a 75-g oral glucose  
50 tolerance test (OGTT)<sup>43</sup>. Blood samples will be collected at -10, 0, 30, 60, 90, and 120 minutes for  
51 glucose and insulin measurements. The Matsuda index is highly correlated with the hyperinsulinaemic  
52 euglycaemic clamp (the gold-standard assessment of insulin sensitivity<sup>44</sup>) and has excellent  
53 reproducibility during multiple measures<sup>45</sup>. Other markers of glycaemic control will also be measured,  
54  
55  
56  
57  
58  
59

1  
2  
3  
4  
5  
6  
7  
8  
9  
10  
11  
12  
13  
14  
15  
16  
17  
18  
19  
20  
21  
22  
23  
24  
25  
26  
27  
28  
29  
30  
31  
32  
33  
34  
35  
36  
37  
38  
39  
40  
41  
42  
43  
44  
45  
46  
47  
48  
49  
50  
51  
52  
53  
54  
55  
56  
57  
58  
59  
60

namely homeostasis model assessment of insulin resistance (HOMA-IR)<sup>46</sup> and glycated haemoglobin (HbA1c).

#### *Other blood tests*

Fasting blood samples will be taken during the insulin sensitivity assessment to measure a number of other parameters. These will include markers of metabolic syndrome, such as uric acid, high-sensitivity C-reactive protein (hsCRP), and fasting lipids (*i.e.* total cholesterol, high-density lipoprotein cholesterol [HDL-C], low-density lipoprotein cholesterol [LDL-C], and triglycerides). Liver function will be assessed by measurement of gamma-glutamyl transferase (GGT), alkaline phosphatase (ALP), alanine aminotransferase (ALT), and aspartate transaminase (AST).

#### *Anthropometry and body composition*

Height will be measured to the nearest mm using a Harpenden stadiometer. Recipients will be asked to undo any hairstyle that might interfere with the measurements; they will stand with their feet together, with their back straight, and their heels in the same upright plane as the back of the head. Gentle upward traction on the mastoid process will be applied to straighten out the spine. Weight will be measured on a weighing scale (WM206, Wedderburn, Auckland, New Zealand) to the nearest 10 g. For weight measurements, the scale will be placed on a solid level floor, with recipients stepping on it with both feet at its centre. Both height and weight will be measured three times and an average calculated; recipients will also be asked to remove shoes and bulky clothing, and to empty their pockets of any objects. Both the scale and stadiometer at our clinical research unit are checked on a weekly basis using the appropriate standards.

BMI will be calculated and transformed into standard deviations scores (SDS) adjusted for age and sex, using Cole et al.'s British 1990 standards<sup>47</sup>. Waist and hip circumferences will be measured as per guidelines from the World Health Organization<sup>48</sup>. Both the waist and hip circumference measurements will be performed three times and the average calculated. Both measurements will be made to the nearest mm with a standard measuring tape parallel to the floor, which is placed snugly around the recipient but without compressing the skin<sup>49</sup>. Body composition will be assessed using whole-body dual-energy X-ray absorptiometry (DXA, Lunar Prodigy<sup>TM</sup> and Lunar iDXA<sup>TM</sup>, GE Medical Systems, Chicago, Illinois, USA). Recipients will have all longitudinal body composition data collected on the same device.

#### *Blood pressure*

1  
2  
3  
4  
5  
6  
7  
8  
9  
10  
11  
12  
13  
14  
15  
16  
17  
18  
19  
20  
21  
22  
23  
24  
25  
26  
27  
28  
29  
30  
31  
32  
33  
34  
35  
36  
37  
38  
39  
40  
41  
42  
43  
44  
45  
46  
47  
48  
49  
50  
51  
52  
53  
54  
55  
56  
57  
58  
59  
60

Clinic resting systolic and diastolic blood pressures will be measured at all assessments using the same oscillometric digital blood pressure monitor (ri-champion® N; Riester, Jungingen, Germany) with an appropriately-sized cuff on the extended non-dominant arm. All measurements will be recorded on each recipient while seated and after a 5-minute rest. Blood pressure will be measured three times, and the average value calculated.

In addition, 24-hour ambulatory blood pressure monitoring will be performed at baseline and at 6 weeks, using an oscillometric device (Spacelabs 90217; Spacelabs Medical Inc, Redmond, Washington, USA) on the non-dominant arm. Over a 24-hour period, blood pressure will be measured every 20 minutes when the recipients are expected to be awake, and every 30 minutes when they are likely to be asleep (based on self-reported information). Recipients will be asked to record the time they go to bed and the time they wake up over the period of monitoring, so that waking and sleeping times can be more accurately identified.

#### *Dietary intake*

A dietary record describing all foods and fluids consumed over three days will be collected at the 6-week assessment. Recipients will be asked to describe all foods and fluids consumed in detail including brand names, types of foods (e.g. low fat), and cooking methods. Quantities will be described using standard household measures, as well as the information from food labels (where appropriate). Recipients will be provided with standardized instructions for completing the dietary record by a trained investigator, who will also review individual records with recipients to clarify errors, omissions, questionable entries, or unclear descriptions. These dietary records will be entered into FoodWorks software (v9.0, Xyris Software, Brisbane, Australia) by a trained investigator.

The New Zealand Adolescent Food Frequency Questionnaire (NZAFFQ)<sup>50</sup> will be administered at baseline and weeks 6, 12, and 26. The NZAFFQ was developed for and validated in New Zealand adolescents aged 14 to 18 years<sup>50</sup>.

#### *Physical activity levels*

These will be measured using two questionnaires:

- International Physical Activity Questionnaire (IPAQ)<sup>51</sup> – it covers four domains of physical activity, namely work-related, transportation, housework/gardening, and leisure time.

1  
2  
3 • Adolescent Sedentary Activity Questionnaire (ASAQ)<sup>52</sup> – it covers a number of sedentary activities  
4 across five categories (small screen recreation, education, travel, cultural activities, and social  
5 activities).  
6

### 8 *Health-related quality of life*

9

10  
11 This will be assessed using:

- 12  
13  
14 • EPOCH Measure of Adolescent Well-Being<sup>53</sup> – it provides an assessment of five positive  
15 psychological characteristics (engagement, perseverance, optimism, connectedness, and happiness).  
16  
17  
18 • Pediatric Quality of Life Inventory (PedsQL)<sup>54</sup> – we will adopt only the teen and young adult self-  
19 reports (*i.e.* not the parent-proxy), which assess problems over the preceding month relating to physical,  
20 emotional, social, and school functioning.  
21  
22

23  
24 In addition, we will assess symptoms of irritable bowel syndrome<sup>55</sup> and bowel movements using the  
25 Birmingham IBS symptom questionnaire and bowel movements questionnaire respectively. The  
26 Birmingham IBS symptom questionnaire is a self-administered 11-item symptom questionnaire that is  
27 scored using the Rome II criteria<sup>55</sup>. The bowel movement questionnaire was designed for this trial to  
28 assess and monitor changes pre and post treatment.  
29  
30  
31

### 32 33 *Gut microbial composition*

34

35  
36 Gut microbial composition will be evaluated via 16S rRNA amplicon sequencing.  
37  
38

### 39 **Safety monitoring**

40

41  
42 An independent safety monitoring committee has been established. All recipients are advised to remain  
43 under supervision in the clinical research unit for one hour after initial treatment and we will adopt  
44 robust exclusion and screening criteria for donors (as previously described). In addition, recipients' data  
45 will be monitored by the research team and the safety committee throughout the study for any adverse  
46 events, in particular gastrointestinal symptoms and possible allergies. All potential adverse events will  
47 be recorded.  
48  
49  
50

51  
52  
53 If any concerns are identified during screening or clinical assessment of donors or recipients, further  
54 clinical evaluation and/or investigation will be immediately undertaken. If concerns are identified  
55 during the study, the recipient will be withdrawn if this is thought to be in their best interest.  
56  
57  
58

## Outcome measures

### *Primary outcome*

- BMI SDS at 6 weeks.

### *Secondary outcomes*

- BMI SDS at 12, and 26 weeks
- total body fat percentage (from DXA) at 6, 12, and 26 weeks
- insulin sensitivity at 6, 12, and 26 weeks
- gut microbial composition at 6, 12, and 26 weeks
- liver function at 6, 12, and 26 weeks
- lipid profile at 6, 12, and 26 weeks
- inflammatory markers [uric acid, high-sensitivity C-reactive protein (hsCRP)] at 6, 12, and 26 weeks
- blood pressure at 6, 12, and 26 weeks
- health-related quality of life at 6, 12, and 26 weeks
- IBS symptoms at 6, 12, and 26 weeks
- bowel movements at 6, 12, and 26 weeks

## Sample size and power calculation

Power calculation was based on data from a cohort of 50 obese adolescents in Australia aged 14–18 years, with a pooled mean BMI SDS of 2.5 and standard deviation of 0.27 at baseline<sup>56</sup>. A study with 32 recipients per group will have 80% power at 5% significance level (two-sided) to detect a group difference of 0.19 in BMI SDS at 6 weeks after gut microbiome transfer. To account for an approximate 20% loss to follow-up, we aim to recruit 40 treatment and 40 control recipients.

## Data management

All data collected will be entered and stored in password-protected web-based platforms. Rules for data validation will be in place to minimize human error, and all data entered by members of the research team will be double-checked by the database administrator to ensure accuracy of stored records.

## Statistical analysis

1  
2  
3 Treatment evaluation will be performed on the principle of intention to treat, using data collected from  
4 all randomised recipients. Baseline demographics and clinical characteristics of recipients will be  
5 summarised by randomised group. The distribution of outcome measures will be first evaluated at  
6 scheduled visits using descriptive statistics. Generalised linear regression models will be used to assess  
7 treatment effects between groups, adjusting for the baseline outcome value and sex. Model-adjusted  
8 estimates and the differences between the two groups will be calculated with 95% confidence intervals.  
9  
10 Random effects mixed models will be used to evaluate the outcomes measured repeatedly over time,  
11 controlling for correlated data collected from the same recipient. Planned subgroup analysis by sex will  
12 be conducted on primary and key secondary outcomes to evaluate the consistency of main treatment  
13 effects in males and females. Missing data on the primary outcome will be imputed using multiple  
14 imputations. Per-protocol analyses will be carried out on those recipients without major protocol  
15 violations. Data analyses will be performed in SAS v.9.4 (SAS Institute, Cary, NC, USA), SPSS v25  
16 (IBM Corp, Armonk, NY, USA), and/or Minitab v.16 (Pennsylvania State University, State College,  
17 PA, USA). All statistical tests will be two-sided at  $p < 0.05$ , with no adjustments for multiple  
18 comparisons. The CONSORT 2010 guidelines will be followed in reporting the main trial results.  
19  
20  
21  
22  
23  
24  
25

### 26 **Study status**

27  
28  
29 The recruitment of recipients for the trial began in Oct 2017. It is expected that the study will be  
30 completed in mid-2019.  
31  
32

### 33 **Patient and public involvement**

34  
35  
36 Public input into the study design was provided through the Northern A Health and Disability Ethics  
37 Committee. Participants will not be involved in the development, recruitment of other participants, or  
38 conduct of the trial. All recipients will be asked about any possible adverse effects of treatment at  
39 specific time points throughout the trial; if any serious adverse effects are reported, a thorough follow-  
40 up will be conducted to investigate the incident. After completion of data analyses, all recipients will  
41 receive information about their individual results.  
42  
43  
44  
45  
46

### 47 **ETHICS AND DISSEMINATION**

48  
49  
50 Ethics approval for this study was granted in November 2016 by the Northern A Health and Disability  
51 Ethics Committee (Ministry of Health, New Zealand; 16/NTA/172). Involvement in this trial will be  
52 entirely voluntary. If a recipient agrees to take part, they will be free to withdraw from the study at any  
53 time. In addition, the participant will be withdrawn if the research team believes their ongoing  
54  
55  
56  
57  
58  
59  
60

1  
2 involvement in the study is not in their best interest. Donors and recipients will be required to provide  
3 written informed consent prior to participation in the study.  
4  
5

6  
7 Clinical and biochemical data will be entered into secure databases protected by passwords, with access  
8 restricted to investigators. Recipients and caregivers will be informed of incidental findings on  
9 unrecognized conditions (*e.g.* diabetes), with further medical follow-up arranged. Importantly, if at the  
10 end of the trial we find that gut microbiome transfer leads to a statistically significant improvement in  
11 key health outcomes, the treatment will be offered to all recipients who received placebo. Recipients  
12 and caregivers will also be provided with information on individual results.  
13  
14  
15

16  
17 Study findings will be published in peer-reviewed journals. Further communication to the scientific  
18 community will be made through presentations in international research meetings. Our findings may be  
19 communicated to the general public across New Zealand and internationally through external media,  
20 including social media.  
21  
22  
23

## 24 **REGISTRATION DETAILS**

25  
26  
27 This study is registered with the Australian New Zealand Clinical Trials Registry (ACTRN:  
28 ACTRN12615001351505p). In addition, the Universal Trial Number (UTN), World Health  
29 Organization, has been obtained (U1111-1176-6753).  
30  
31  
32

33  
34 **Author contributions:** WSC, JMO, JGBD, KSWL, BBA, VC, DJH, DMS, TNJ, YJ, KLB, CAC, WS,  
35 and TV contributed to the conception and design of the study. KSWL, JGBD, WSC, JMO, TNJ, BBA,  
36 and VC drafted the protocol with input from all other authors.  
37  
38

39  
40 **Acknowledgements:** We thank Wendy Ranson, Yara Gerber, Janene Biggs, and for their valuable  
41 assistance during the development of this trial, and Khan Safayet Hossin for help with the database.  
42  
43

44  
45 **Funding:** This research received funding from the Rockfield Trust and A Better Start – National  
46 Science Challenge. VC was supported by a Long-Term Research Fellowship from the European Society  
47 for Paediatric Endocrinology (ESPE), TNJ received a University of Auckland Scholarship, and BBA is  
48 supported by a Maurice Paykel Research Fellowship.  
49  
50

51  
52 **Competing interests:** None declared.  
53

## 54 **REFERENCES**



- 1
- 2
- 3
- 4 1. Burcelin R, Serino M, Chabo C, *et al*. Metagenome and metabolism: the tissue microbiota hypothesis. *Diabetes Obes Metab* 2013;15:61-70.
- 5
- 6 2. Musso G, Gambino R, Cassader M. Obesity, diabetes, and gut microbiota: the hygiene hypothesis expanded? *Diabetes Care* 2010;33:2277-84.
- 7
- 8 3. Backhed F, Ding H, Wang T, *et al*. The gut microbiota as an environmental factor that regulates fat storage. *Proc Natl Acad Sci U S A* 2004;101:15718-23.
- 9
- 10 4. Turnbaugh PJ, Backhed F, Fulton L, *et al*. Diet-induced obesity is linked to marked but reversible alterations in the mouse distal gut microbiome. *Cell Host Microbe* 2008;3:213-23.
- 11
- 12 5. Backhed F, Manchester JK, Semenkovich CF, *et al*. Mechanisms underlying the resistance to diet-induced obesity in germ-free mice. *Proc Natl Acad Sci U S A* 2007;104:979-84.
- 13
- 14 6. Turnbaugh PJ, Ridaura VK, Faith JJ, *et al*. The effect of diet on the human gut microbiome: a metagenomic analysis in humanized gnotobiotic mice. *Sci Transl Med* 2009;1:6ra14.
- 15
- 16 7. Dumas ME, Barton RH, Toye A, *et al*. Metabolic profiling reveals a contribution of gut microbiota to fatty liver phenotype in insulin-resistant mice. *Proc Natl Acad Sci U S A* 2006;103:12511-6.
- 17
- 18 8. Ma J, Zhou Q, Li H. Gut microbiota and nonalcoholic fatty liver disease: Insights on mechanisms and therapy. *Nutrients* 2017;9
- 19
- 20 9. Evans JM, Morris LS, Marchesi JR. The gut microbiome: the role of a virtual organ in the endocrinology of the host. *J Endocrinol* 2013;218:R37-47.
- 21
- 22 10. Hota SS, Achonu C, Crowcroft NS, *et al*. Determining mortality rates attributable to *Clostridium difficile* infection. *Emerg Infect Dis* 2012;18:305-7.
- 23
- 24 11. van Nood E, Vrieze A, Nieuwdorp M, *et al*. Duodenal infusion of donor feces for recurrent *Clostridium difficile*. *N Engl J Med* 2013;368:407-15.
- 25
- 26 12. Youngster I, Russell GH, Pindar C, *et al*. Oral, capsulized, frozen fecal microbiota transplantation for relapsing *Clostridium difficile* infection. *JAMA* 2014;312:1772-8.
- 27
- 28 13. Hirsch BE, Saraiya N, Poeth K, *et al*. Effectiveness of fecal-derived microbiota transfer using orally administered capsules for recurrent *Clostridium difficile* infection. *BMC Infect Dis* 2015;15:191.
- 29
- 30 14. Vrieze A, Van Nood E, Holleman F, *et al*. Transfer of intestinal microbiota from lean donors increases insulin sensitivity in individuals with metabolic syndrome. *Gastroenterology* 2012;143:913-6 e7.
- 31
- 32 15. Weingarden A, Gonzalez A, Vazquez-Baeza Y, *et al*. Dynamic changes in short- and long-term bacterial composition following fecal microbiota transplantation for recurrent *Clostridium difficile* infection. *Microbiome* 2015;3:10.
- 33
- 34 16. Walker AW, Parkhill J. Microbiology. Fighting obesity with bacteria. *Science* 2013;341:1069-70.
- 35
- 36 17. Alang N, Kelly CR. Weight gain after fecal microbiota transplantation. *Open Forum Infect Dis* 2015;2:ofv004.
- 37
- 38 18. Ridaura VK, Faith JJ, Rey FE, *et al*. Gut microbiota from twins discordant for obesity modulate metabolism in mice. *Science* 2013;341:1241214.
- 39
- 40
- 41
- 42
- 43
- 44
- 45
- 46
- 47
- 48
- 49
- 50
- 51
- 52
- 53
- 54
- 55
- 56
- 57
- 58
- 59
- 60

19. Hill C, Guarner F, Reid G, *et al.* Expert consensus document. The International Scientific Association for Probiotics and Prebiotics consensus statement on the scope and appropriate use of the term probiotic. *Nat Rev Gastroenterol Hepatol* 2014;11:506-14.
20. Park S, Bae JH. Probiotics for weight loss: a systematic review and meta-analysis. *Nutr Res* 2015;35:566-75.
21. Sun J, Buys N. Effects of probiotics consumption on lowering lipids and CVD risk factors: A systematic review and meta-analysis of randomized controlled trials. *Ann Med* 2015;47:430-40.
22. Liou AP, Paziuk M, Luevano JM, Jr., *et al.* Conserved shifts in the gut microbiota due to gastric bypass reduce host weight and adiposity. *Sci Transl Med* 2013;5:178ra41.
23. Kassam Z, Lee CH, Yuan Y, *et al.* Fecal microbiota transplantation for *Clostridium difficile* infection: systematic review and meta-analysis. *Am J Gastroenterol* 2013;108:500-8.
24. Colman RJ, Rubin DT. Fecal microbiota transplantation as therapy for inflammatory bowel disease: a systematic review and meta-analysis. *J Crohns Colitis* 2014;8:1569-81.
25. World Health Organization. Ending Childhood Obesity Report of The Commission on Ending Childhood Obesity. Geneva, 2016. [Available from: <http://www.who.int/end-childhood-obesity/publications/echo-report/en/>] accessed 20 August 2018.
26. The NS, Suchindran C, North KE, *et al.* Association of adolescent obesity with risk of severe obesity in adulthood. *JAMA* 2010;304:2042-7.
27. Guo SS, Roche AF, Chumlea WC, *et al.* The predictive value of childhood body mass index values for overweight at age 35 y. *Am J Clin Nutr* 1994;59:810-9.
28. Halfon N, Larson K, Slusser W. Associations between obesity and comorbid mental health, developmental, and physical health conditions in a nationally representative sample of US children aged 10 to 17. *Academic pediatrics* 2013;13:6-13.
29. Engeland A, Bjorge T, Sogaard AJ, *et al.* Body mass index in adolescence in relation to total mortality: 32-year follow-up of 227,000 Norwegian boys and girls. *Am J Epidemiol* 2003;157:517-23.
30. Twig G, Yaniv G, Levine H, *et al.* Body-mass index in 2.3 million adolescents and cardiovascular death in adulthood. *N Engl J Med* 2016;374:2430-40.
31. New Zealand Blood Service. Detailed eligibility criteria. [Available from: <https://www.nzblood.co.nz/give-blood/donating/detailed-eligibility-criteria/>] accessed 20 August 2018.
32. Bibby K, Peccia J. Identification of viral pathogen diversity in sewage sludge by metagenome analysis. *Environ Sci Technol* 2013;47:1945-51.
33. Lacy BE, Patel NK. Rome criteria and a diagnostic approach to irritable bowel syndrome. *Journal of clinical medicine* 2017;6
34. Vanner SJ, Depew WT, Paterson WG, *et al.* Predictive value of the Rome criteria for diagnosing the irritable bowel syndrome. *Am J Gastroenterol* 1999;94:2912-7.

- 1
  - 2
  - 3
  - 4
  - 5
  - 6
  - 7
  - 8
  - 9
  - 10
  - 11
  - 12
  - 13
  - 14
  - 15
  - 16
  - 17
  - 18
  - 19
  - 20
  - 21
  - 22
  - 23
  - 24
  - 25
  - 26
  - 27
  - 28
  - 29
  - 30
  - 31
  - 32
  - 33
  - 34
  - 35
  - 36
  - 37
  - 38
  - 39
  - 40
  - 41
  - 42
  - 43
  - 44
  - 45
  - 46
  - 47
  - 48
  - 49
  - 50
  - 51
  - 52
  - 53
  - 54
  - 55
  - 56
  - 57
  - 58
  - 59
  - 60
35. Marzorati M, Possemiers S, Verhelst A, *et al.* A novel hypromellose capsule, with acid resistance properties, permits the targeted delivery of acid-sensitive products to the intestine. *LWT Food Sci Technol* 2015;60:544-51.
36. Miller DS, Parsons AM, Bresland J, *et al.* A simple and inexpensive enteric-coated capsule for delivery of acid-labile macromolecules to the small intestine. *J Zhejiang Univ-Sci B* 2015;16:586-92.
37. Amo R. DRcaps® capsules achieve delayed release properties for nutritional ingredients in human clinical study: Capsugel Inc, 2014. [Available from: <https://www.capsugel.com/knowledge-center/drcaps-achieve-delayed-release-properties-for-nutritional-ingredients-in-hu>] accessed 20 August 2018.
38. Bourdin G, Schmitt B, Marvin Guy L, *et al.* Amplification and purification of T4-like *Escherichia coli* phages for phage therapy: from laboratory to pilot scale. *Appl Environ Microbiol* 2014;80:1469-76.
39. Sealed Envelope Ltd. Create a blocked randomisation list [Available from: <https://www.sealedenvelope.com/simple-randomiser/v1/lists>] accessed 3 Mar 2017.
40. Bang H, Ni L, Davis CE. Assessment of blinding in clinical trials. *Control Clin Trials* 2004;25:143-56.
41. Moroz A, Freed B, Tiedemann L, *et al.* Blinding measured: a systematic review of randomized controlled trials of acupuncture. *Evid Based Complement Alternat Med* 2013;2013:708251.
42. Jalanka J, Salonen A, Salojärvi J, *et al.* Effects of bowel cleansing on the intestinal microbiota. *Gut* 2015;64:1562-8.
43. Matsuda M, DeFronzo RA. Insulin sensitivity indices obtained from oral glucose tolerance testing: comparison with the euglycemic insulin clamp. *Diabetes Care* 1999;22:1462-70.
44. Lorenzo C, Haffner SM, Stančáková A, *et al.* Relation of direct and surrogate measures of insulin resistance to cardiovascular risk factors in nondiabetic finnish offspring of type 2 diabetic individuals. *J Clin Endocrinol Metab* 2010;95:5082-90.
45. Maki KC, Rains TM, Dicklin MR, *et al.* Repeatability of indices of insulin sensitivity and secretion from standard liquid meal tests in subjects with type 2 diabetes mellitus or normal or impaired fasting glucose. *Diabetes Technol Ther* 2010;12:895-900.
46. Wallace TM, Levy JC, Matthews DR. Use and abuse of HOMA modeling. *Diabetes Care* 2004;27:1487-95.
47. Cole TJ, Freeman JV, Preece MA. Body mass index reference curves for the UK, 1990. *Arch Dis Child* 1995;73:25-9.
48. World Health Organization. Waist circumference and waist-hip ratio: report of a WHO expert consultation, Geneva, 8–11 December 2008. Geneva, 2008. [Available from: [http://www.who.int/nutrition/publications/obesity/WHO\\_report\\_waistcircumference\\_and\\_waisthip\\_ratio/en/](http://www.who.int/nutrition/publications/obesity/WHO_report_waistcircumference_and_waisthip_ratio/en/)] accessed 20 August 2018.

- 1  
2  
3 49. National Center for Health Statistics. National Health and Nutrition Examination Survey III - Body  
4 Measurements (Anthropometry). Rockville, MD, USA: Centers for Disease Control and  
5 Prevention, 1988. [Available from: <https://wwwn.cdc.gov/nchs/data/nhanes3/manuals/anthro.pdf>]  
6 accessed 20 August 2018.  
7  
8 50. Wong JE, Parnell WR, Black KE, *et al.* Reliability and relative validity of a food frequency  
9 questionnaire to assess food group intakes in New Zealand adolescents. *Nutr J* 2012;11:65.  
10  
11 51. Hagstromer M, Oja P, Sjostrom M. The International Physical Activity Questionnaire (IPAQ): a  
12 study of concurrent and construct validity. *Public Health Nutr* 2006;9:755-62.  
13  
14 52. Hardy LL, Booth ML, Okely AD. The reliability of the Adolescent Sedentary Activity  
15 Questionnaire (ASAQ). *Prev Med* 2007;45:71-4.  
16  
17 53. Kern ML, Benson L, Steinberg EA, *et al.* The EPOCH Measure of Adolescent Well-Being. *Psychol*  
18 *Assess* 2016;28:586-97.  
19  
20 54. Varni JW, Seid M, Knight TS, *et al.* The PedsQL 4.0 Generic Core Scales: sensitivity,  
21 responsiveness, and impact on clinical decision-making. *J Behav Med* 2002;25:175-93.  
22  
23 55. Roalfe AK, Roberts LM, Wilson S. Evaluation of the Birmingham IBS symptom questionnaire.  
24 *BMC Gastroenterol* 2008;8:30.  
25  
26 56. O'Brien PE, Sawyer SM, Laurie C, *et al.* Laparoscopic adjustable gastric banding in severely obese  
27 adolescents: a randomized trial. *JAMA* 2010;303:519-26.  
28  
29 57. Bakken JS, Borody T, Brandt LJ, *et al.* Treating *Clostridium difficile* infection with fecal microbiota  
30 transplantation. *Clin Gastroenterol Hepatol* 2011;9:1044-9.  
31  
32  
33  
34  
35  
36  
37  
38  
39  
40  
41  
42  
43  
44  
45  
46  
47  
48  
49  
50  
51  
52  
53  
54  
55  
56  
57  
58  
59  
60

**Table 1.** Inclusion and exclusion criteria for donors in the Gut Bugs Trial. Exclusion criteria adapted from Youngster et al., Hirsch et al., van Nood et al., and Bakken et al.<sup>11-13,57</sup>.

---

|                  |                                                                                                                                                                                                                                                                                                                                                                                                                                                                                                                                                                                                                                                                                                                                                                                                                                                                                                                                                                                                                                                                                                                                                                                                                                                                                                                                                                                                            |
|------------------|------------------------------------------------------------------------------------------------------------------------------------------------------------------------------------------------------------------------------------------------------------------------------------------------------------------------------------------------------------------------------------------------------------------------------------------------------------------------------------------------------------------------------------------------------------------------------------------------------------------------------------------------------------------------------------------------------------------------------------------------------------------------------------------------------------------------------------------------------------------------------------------------------------------------------------------------------------------------------------------------------------------------------------------------------------------------------------------------------------------------------------------------------------------------------------------------------------------------------------------------------------------------------------------------------------------------------------------------------------------------------------------------------------|
| <b>Inclusion</b> | <ul style="list-style-type: none"><li>• Age 18 to 28 years</li><li>• BMI &gt;18.5 kg/m<sup>2</sup> and &lt;30.0 kg/m<sup>2</sup></li><li>• Total body fat ≤29% for females and ≤19% for males</li><li>• Regular exercise (moderate to vigorous physical activity for at least 3.5 hours per week)</li><li>• Regular bowel habit (at least once every two days)</li><li>• Intake of ≥4 portions of fruit and/or vegetables per day</li></ul>                                                                                                                                                                                                                                                                                                                                                                                                                                                                                                                                                                                                                                                                                                                                                                                                                                                                                                                                                                |
| <b>Exclusion</b> | <ul style="list-style-type: none"><li>• Any transmissible viral or bacterial pathogens, or intestinal parasites</li><li>• Multidrug-resistant organisms (<i>e.g.</i> vancomycin-resistant enterococci, extended-spectrum beta-lactamase-producing Enterobacteriaceae, and carbapenem-resistant Enterobacteriaceae)</li><li>• Gastrointestinal disease (including symptoms of irritable bowel syndrome, inflammatory bowel disease, or coeliac disease)</li><li>• Atopic diseases requiring regular prophylaxis or treatment</li><li>• Current or past history of malignancy</li><li>• Impaired fasting glucose or impaired glucose tolerance</li><li>• Type 1 diabetes, type 2 diabetes, or monogenic diabetes</li><li>• Known dyslipidaemia, hypertension, or metabolic syndrome</li><li>• Regular use of medications known to influence metabolism or the gut microbiome</li><li>• Use of oral antibiotics in the past three months</li><li>• Regular 'binge drinking', <i>i.e.</i> consumption of 5 or more standard drinks of alcohol per session, at least once a week</li><li>• Any use of recreational drugs or tobacco</li><li>• Current or past pregnancy</li><li>• Overseas travel in previous 6 months, except for visits to Australia, UK, USA, Canada, Northern Europe, France, and Germany.</li><li>• UK residence in 1980–1996 (due to risk of variant Creutzfeldt-Jakob disease)</li></ul> |

---

**Table 2.** Inclusion and exclusion criteria for recipients in the Gut Bugs Trial.

---

|                  |                                                                                                                                                                                                                                                                                                                                                                                                                                                                                                                                                                                                                                                                                                                                                          |
|------------------|----------------------------------------------------------------------------------------------------------------------------------------------------------------------------------------------------------------------------------------------------------------------------------------------------------------------------------------------------------------------------------------------------------------------------------------------------------------------------------------------------------------------------------------------------------------------------------------------------------------------------------------------------------------------------------------------------------------------------------------------------------|
| <b>Inclusion</b> | <ul style="list-style-type: none"><li>• Aged 14 to 18 years</li><li>• BMI <math>\geq 30</math> kg/m<sup>2</sup></li><li>• Post-pubertal (Tanner stage 5)</li></ul>                                                                                                                                                                                                                                                                                                                                                                                                                                                                                                                                                                                       |
| <b>Exclusion</b> | <ul style="list-style-type: none"><li>• Gastrointestinal disease (including inflammatory bowel disease or coeliac disease)</li><li>• Use of regular medications that may influence weight, metabolism, or the gut microbiome (including oral contraceptives, antidepressants, glucose-lowering drugs, diet drugs, as well as inhaled, topical, or oral steroids)</li><li>• Type 1 diabetes, type 2 diabetes, or monogenic diabetes</li><li>• Chronic diseases (other than obesity-related conditions)</li><li>• Food allergies</li><li>• Allergy to macrogol (active ingredient in the bowel preparation product)</li><li>• Allergy to any over-the-counter medication</li><li>• No antibiotic usage for three months prior to trial treatment</li></ul> |

---

**Table 3.** Timing of individual assessments in the Gut Bugs Trial.

|                           |                                                            | Baseline | 6 weeks | 12 weeks | 26 weeks |
|---------------------------|------------------------------------------------------------|----------|---------|----------|----------|
| <b>Clinic</b>             | Medical history and exam                                   | ✓        | ✓       | ✓        | ✓        |
|                           | Anthropometry                                              | ✓        | ✓       | ✓        | ✓        |
|                           | DXA                                                        | ✓        | ✓       | ✓        | ✓        |
|                           | Clinic blood pressure                                      | ✓        | ✓       | ✓        | ✓        |
|                           | 24-h ambulatory blood pressure monitoring                  | ✓        | ✓       | -        | -        |
| <b>Questionnaires</b>     | 3-day dietary record                                       | -        | ✓       | -        | -        |
|                           | NZAFFQ                                                     | ✓        | ✓       | ✓        | ✓        |
|                           | Birmingham IBS                                             | ✓        | ✓       | ✓        | ✓        |
|                           | Bowel movement questionnaire                               | ✓        | ✓       | ✓        | ✓        |
|                           | PedsQL                                                     | ✓        | ✓       | ✓        | ✓        |
|                           | EPOCH                                                      | ✓        | ✓       | ✓        | ✓        |
|                           | IPAQ                                                       | ✓        | ✓       | ✓        | ✓        |
|                           | ASAQ                                                       | ✓        | ✓       | ✓        | ✓        |
| <b>Laboratory</b>         | Matsuda Index                                              | ✓        | ✓       | ✓        | ✓        |
|                           | HOMA-IR                                                    | ✓        | ✓       | ✓        | ✓        |
|                           | HbA1c                                                      | ✓        | ✓       | ✓        | ✓        |
|                           | Fasting lipid profile                                      | ✓        | ✓       | ✓        | ✓        |
|                           | Liver function tests                                       | ✓        | ✓       | ✓        | ✓        |
|                           | hsCRP and uric acid                                        | ✓        | ✓       | ✓        | ✓        |
| <b>Stool bacteriology</b> | Gut microbial composition via 16S rRNA amplicon sequencing | ✓        | ✓       | ✓        | ✓        |

ASAQ, Adolescent Sedentary Activity Questionnaire; DXA, Dual-energy x-ray absorptiometry; EPOCH, Engagement Perseverance Optimism Connectedness Happiness; HbA1c, glycated haemoglobin; HOMA-IR, homeostasis model assessment of insulin resistance; hsCRP, high-sensitivity C-Reactive Protein; IBS, irritable bowel syndrome; IPAQ, International Physical Activity Questionnaire; NZAFFQ, New Zealand Adolescent food frequency questionnaire; PedsQL, Pediatric Quality of Life Inventory;

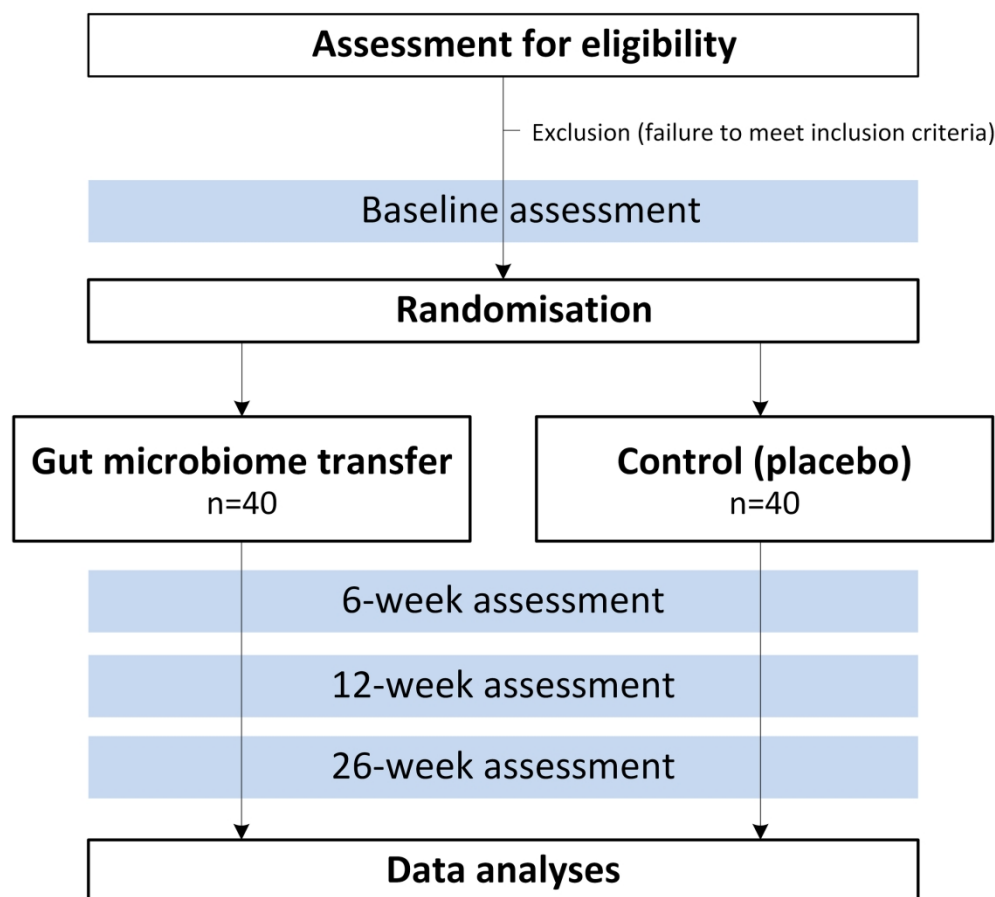

Diagram showing flow of participants (recipients) in the Gut Bugs Trial.

109x99mm (600 x 600 DPI)



# BMJ Open

## Protocol for the Gut Bugs Trial: a randomised double-blind placebo-controlled trial of gut microbiome transfer for the treatment of obesity in adolescents

|                                 |                                                                                                                                                                                                                                                                                                                                                                                                                                                                                                                                                                                                                                                                                                                                                                                                                                                                                                                                                                                                                                                                                                                                                                                                                                                            |
|---------------------------------|------------------------------------------------------------------------------------------------------------------------------------------------------------------------------------------------------------------------------------------------------------------------------------------------------------------------------------------------------------------------------------------------------------------------------------------------------------------------------------------------------------------------------------------------------------------------------------------------------------------------------------------------------------------------------------------------------------------------------------------------------------------------------------------------------------------------------------------------------------------------------------------------------------------------------------------------------------------------------------------------------------------------------------------------------------------------------------------------------------------------------------------------------------------------------------------------------------------------------------------------------------|
| Journal:                        | <i>BMJ Open</i>                                                                                                                                                                                                                                                                                                                                                                                                                                                                                                                                                                                                                                                                                                                                                                                                                                                                                                                                                                                                                                                                                                                                                                                                                                            |
| Manuscript ID                   | bmjopen-2018-026174.R1                                                                                                                                                                                                                                                                                                                                                                                                                                                                                                                                                                                                                                                                                                                                                                                                                                                                                                                                                                                                                                                                                                                                                                                                                                     |
| Article Type:                   | Protocol                                                                                                                                                                                                                                                                                                                                                                                                                                                                                                                                                                                                                                                                                                                                                                                                                                                                                                                                                                                                                                                                                                                                                                                                                                                   |
| Date Submitted by the Author:   | 05-Dec-2018                                                                                                                                                                                                                                                                                                                                                                                                                                                                                                                                                                                                                                                                                                                                                                                                                                                                                                                                                                                                                                                                                                                                                                                                                                                |
| Complete List of Authors:       | <p>Leong, Karen; University of Auckland, Liggins Institute<br/>           Jayasinghe, Thilini ; University of Auckland, Liggins Institute<br/>           Derraik, José; University of Auckland, Liggins Institute<br/>           Albert, Benjamin; University of Auckland, Liggins Institute<br/>           Chiavaroli , Valentina ; University of Auckland, Liggins Institute<br/>           Svirskis, Darren; School of Pharmacy, Faculty of Medical and Health Sciences, University of Auckland, Private Bag 92019, Auckland 1142, New Zealand<br/>           Beck, Kathryn; Massey University, School of Sport Exercise and Nutrition<br/>           Conlon, Cathryn; Massey University, School of Sport Exercise and Nutrition<br/>           Jiang, Yannan; The University of Auckland, Dept of Statistics<br/>           Schierding , William ; University of Auckland, Liggins Institute<br/>           Vatanen, Tommi; University of Auckland, Liggins Institute<br/>           Holland , David ; Counties Manukau District Health Board, Department of Infectious Diseases<br/>           O'Sullivan, Justin ; University of Auckland, Liggins Institute<br/>           Cutfield, Wayne; University of Auckland, Liggins Institute and NRCGD</p> |
| <b>Primary Subject Heading</b>: | Diabetes and endocrinology                                                                                                                                                                                                                                                                                                                                                                                                                                                                                                                                                                                                                                                                                                                                                                                                                                                                                                                                                                                                                                                                                                                                                                                                                                 |
| Secondary Subject Heading:      | Paediatrics                                                                                                                                                                                                                                                                                                                                                                                                                                                                                                                                                                                                                                                                                                                                                                                                                                                                                                                                                                                                                                                                                                                                                                                                                                                |
| Keywords:                       | Obesity, Paediatric endocrinology < DIABETES & ENDOCRINOLOGY, MICROBIOLOGY, Adolescents, Clinical trials < THERAPEUTICS                                                                                                                                                                                                                                                                                                                                                                                                                                                                                                                                                                                                                                                                                                                                                                                                                                                                                                                                                                                                                                                                                                                                    |
|                                 |                                                                                                                                                                                                                                                                                                                                                                                                                                                                                                                                                                                                                                                                                                                                                                                                                                                                                                                                                                                                                                                                                                                                                                                                                                                            |

SCHOLARONE™  
Manuscripts

# Protocol for the Gut Bugs Trial: a randomised double-blind placebo-controlled trial of gut microbiome transfer for the treatment of obesity in adolescents

Karen S W Leong<sup>1,2</sup>, Thilini N Jayasinghe<sup>1</sup>, José G B Derraik<sup>1,2,3</sup>, Benjamin B Albert<sup>1,2</sup>,  
Valentina Chiavaroli<sup>1</sup>, Darren M Svirskis<sup>4</sup>, Kathryn L Beck<sup>5</sup>, Cathryn A Conlon<sup>5</sup>, Yannan  
Jiang<sup>6</sup>, William Schierding<sup>1</sup>, Tommi Vatanen<sup>1,7</sup>, David J Holland<sup>8</sup>, Justin M O'Sullivan<sup>1,2†</sup>,  
Wayne S Cutfield<sup>1,2†</sup>

<sup>1</sup> Liggins Institute, University of Auckland, Auckland, New Zealand.

<sup>2</sup> A Better Start – National Science Challenge, University of Auckland, Auckland, New Zealand.

<sup>3</sup> Department of Women's and Children's Health, Uppsala University, Uppsala, Sweden.

<sup>4</sup> School of Pharmacy, Faculty of Medical and Health Sciences, University of Auckland, Auckland, New Zealand.

<sup>5</sup> School of Sport Exercise and Nutrition, College of Health, Massey University, Auckland, New Zealand.

<sup>6</sup> Department of Statistics, University of Auckland, Auckland, New Zealand.

<sup>7</sup> Broad Institute of MIT and Harvard, Cambridge, Massachusetts, USA.

<sup>8</sup> Department of Infectious Diseases, Counties Manukau District Health Board, Auckland, New Zealand.

†JM O'Sullivan and WS Cutfield contributed equally to the study.

Corresponding author: Professor Wayne Cutfield, Liggins Institute, University of Auckland, Private Bag 92019, Auckland, New Zealand; e-mail [w.cutfield@auckland.ac.nz](mailto:w.cutfield@auckland.ac.nz); ph +64.9.923.4476; fax +64.9.373.8763.

**Competing interests:** The authors have no financial conflicts of interest to disclose that may be relevant to this work. The funders had no role in study design, decision to publish, or preparation of this manuscript.

**Word count:** 5,405

## ABSTRACT

**Introduction:** Animal studies showed that germ-free mice inoculated with normal mouse gut bacteria developed obesity, insulin resistance, and higher triglyceride levels, despite similar food intake. In humans, an association has been found between obesity and gut microbiome dysbiosis. However, gut microbiome transfer has not been evaluated for the treatment of human obesity. We will examine the effectiveness of gut microbiome transfer using encapsulated material for the treatment of obesity in adolescents.

**Methods and analysis:** A two-arm, double-blind, placebo-controlled, randomised clinical trial of a single course of gut microbiome transfer will be conducted in 80 obese (BMI  $\geq 30$  kg/m<sup>2</sup>) adolescents (males and females, aged 14–18 years) in Auckland, New Zealand. Healthy lean donors (males and females, aged 18–28 years) will provide fresh stool samples from which bacteria will be isolated and double encapsulated. Participants (recipients) will be randomised at 1:1 to control (placebo) or treatment (gut microbiome transfer), stratified by sex. Recipients will receive 28 capsules over two consecutive mornings (~14 ml of frozen microbial suspension or saline). Clinical assessments will be performed at baseline, 6, 12, and 26 weeks, and will include: anthropometry, blood pressure, fasting metabolic markers, dietary intake, physical activity levels, and health-related quality of life. Insulin sensitivity (Matsuda index), gut microbiota population structure characterized by 16S rRNA amplicon sequencing, and body composition (DXA) will be assessed at baseline, 6, 12, and 26 weeks. 24-hour ambulatory blood pressure monitoring will be performed at baseline and at 6 weeks. The primary outcome is BMI standard deviation scores (SDS) at 6 weeks, with BMI SDS at 12 and 26 weeks as secondary outcomes. Other secondary outcomes include insulin sensitivity, adiposity (total body fat percentage), and gut microbial composition at 6, 12, and 26 weeks. Statistical analysis will be performed on the principle of intention to treat.

**Ethics and dissemination:** Ethics approval was provided by the Northern A Health and Disability Ethics Committee (HDEC) (Ministry of Health, New Zealand; 16/NTA/172). The trial results will be published in peer-reviewed journals and presented at international conferences.

**Trial registration number:** ACTRN12615001351505

### Strengths of this study

- This is the largest registered randomised clinical trial of gut microbiome transfer for obesity or insulin resistance in children or adults.
- The double-blind, placebo-controlled design, use of capsules as a non-invasive method of delivery, and characterisation of bacterial diversity and viability in donor stools are main strengths of this randomised clinical trial.
- Conducting a 6-month follow-up after a single treatment with gut microbiome will allow identification of a possible lag between treatment and change in BMI.
- This study is adequately powered to show a meaningful reduction in BMI SDS in the treated group.

### Limitations of this study

Our study will focus on obese adolescents, so that the findings may not be readily extrapolated to individuals with lesser degrees of adiposity or to older adults.

## INTRODUCTION

There is an increasing prevalence of obesity amongst children and adolescents<sup>1</sup>. Obesity tracks and amplifies through life<sup>2 3</sup>, and childhood obesity is associated with even greater severity of obesity and related co-morbidities in adulthood<sup>2 4</sup>. An elevated body mass index (BMI) in adolescence is associated with an increased all-cause mortality in adult life, and it is more predictive of later mortality than an elevated adult BMI<sup>5 6</sup>.

New paradigms on the causes of obesity incorporate a pivotal role for the gut microbiota (*i.e.* the microbial community present in the gastrointestinal tract). In recent years, assessments of the gut microbiome (all of the genes inside these gut microbiota cells) have identified reduced diversity of bacterial taxa as having an important effect on the development of obesity, insulin resistance, and diabetes mellitus<sup>7 8</sup>. The concept that the gut microbiome influences host metabolism and adiposity was introduced through gut microbiome transfer experiments in gnotobiotic (*i.e.* germ-free) mice<sup>9 10</sup>. These gnotobiotic mice have sterile colons and 40% less body fat than conventional mice, despite a food intake that is 29% higher<sup>9</sup>. When germ-free mice were inoculated with normal mouse gut bacteria, they developed obesity, insulin resistance, and increased triglycerides levels, while on the same food intake<sup>11</sup>. Further experiments showed that the gut microbiome modulates both sides of the energy balance equation by: (i) increasing energy yield from the diet stored as triglycerides; and (ii) altering energy expenditure via fatty acid oxidation<sup>10 12 13</sup>. These effects occur either directly within the bowel, or indirectly through the effects of bacterial products that enter the circulation. Current literature indicates that changes to the gut

1  
2  
3 microbiome and their respective products within the host circulation (*e.g.* lipopolysaccharides and short-  
4 chain fatty acids) can alter host responses, modulate insulin resistance, adiposity, and atherosclerosis and  
5 have an effect on the development of non-alcoholic fatty liver disease<sup>14 15</sup>.  
6  
7

8  
9 Gut microbiome transfer is now regularly used to treat recurrent or refractory *Clostridium difficile* colitis,  
10 which is associated with considerable morbidity and a reported 38% mortality<sup>16</sup>. Other treatment  
11 regimens for this disorder have relied on repeated courses of vancomycin, typically with low cure rates  
12 (~31%)<sup>17</sup>. By contrast, a single naso-duodenal infusion of a 'healthy' gut microbiome in elderly patients  
13 with chronic *C. difficile* colitis led to cure in 81% of subjects<sup>17</sup>. This<sup>17</sup> and other studies<sup>18-20</sup> have  
14 demonstrated that gut microbiome transfer is a viable treatment option for recurrent or refractory *C.*  
15 *difficile* colitis, without any noticeable side effects. Studies have confirmed that 6 weeks after gut  
16 microbiome transfer, the recipient's gut microbiome population structure resembles that of the donor<sup>21</sup>.  
17  
18  
19  
20  
21  
22

23 Gut microbiome transfer is a possible treatment for obesity and metabolic syndrome<sup>22</sup>. To date,  
24 investigation of the therapeutic benefit of gut microbiome transfer in adult metabolic disease (obesity and  
25 metabolic syndrome) has been limited<sup>20</sup>. Vrieze et al. performed a short-term gut microbiome transfer  
26 study in 9 treated and 9 control middle-aged adults with metabolic syndrome<sup>20</sup>. Six weeks after gut  
27 microbiome transfer via naso-duodenal tube, treated recipients had an impressive 75% improvement in  
28 insulin sensitivity. Kootte et al. reported similar results at 6 weeks among 38 obese males (median age  
29 56 years), but the improvements in both insulin sensitivity and gut microbiota composition reverted back  
30 to baseline at 18 weeks<sup>23</sup>. Conversely, our group (unpublished data) demonstrated that gut microbiome  
31 composition in recipients changed after gut microbiome transfer to mimic the lean donor's gut  
32 microbiome, and that this effect was sustained 26 weeks after treatment. This indirectly indicates that it  
33 is possible to change the gut microbiome, using a healthy donor, with possible concurrent health benefits.  
34  
35  
36  
37  
38  
39  
40  
41

42 Selection of donors is critical for successful gut microbiome transfer. The adverse effect of an  
43 inappropriate donor was illustrated by a patient with chronic *C. difficile* colitis, who developed new-onset  
44 obesity following gut microbiome transfer from a healthy but overweight donor<sup>24</sup>. Notably, a similar  
45 result was observed when the microbiome from an obese human was transferred into a lean mouse<sup>25</sup>.  
46  
47  
48  
49

50 Gut microbiome transfer is not considered a probiotic treatment<sup>26</sup>. Although gut microbiome transfer and  
51 probiotics involve the administration of live bacteria, this is where the similarities end. Probiotics are one  
52 of several defined live bacterial strains (*e.g.* *Bifidobacterium adolescentis*, *Lactobacillus acidophilus*, and  
53 *Lactobacillus casei*) that have been previously isolated and characterised<sup>26</sup>. The rationale for this  
54 treatment is that these supplemental bacteria and products have been shown to confer general health  
55 benefits. Conversely, gut microbiome transfer consists of transferring the entire microbiome from a  
56 healthy donor to a recipient, in order to establish a healthier microbial community and ameliorate the  
57  
58  
59  
60

undesirable underlying condition. Meta-analyses of randomised control studies of the effects of probiotics (e.g. *Lactobacillus* spp. and fermented milk-based probiotic treatments) on weight loss are conflicting<sup>27</sup><sup>28</sup>. There are currently no published studies of gut microbiome transfer for the treatment of human obesity. However, a study has shown that germ-free mice lose weight following gut microbiome transfer from mice who had gastric bypass surgery and exhibited rapid weight loss<sup>29</sup>. In addition, meta-analyses of the effectiveness of microbial transfers in the treatment of *C. difficile*<sup>30</sup> have demonstrated that gut microbiome transfer is efficacious and safe for inflammatory bowel disease (pooled cure rate 36%; 95% CI 17–60%)<sup>31</sup> and *C. difficile* (pooled cure rate 89%; 95% CI 84–93%)<sup>30</sup>. As such, gut microbiome transfer holds significant promise as a treatment for the rapid and concerted modification of an unhealthy gut microbiome, which we hypothesise will lead to weight loss in obese humans.

This clinical trial will assess whether gut microbiome transfer using encapsulated material is an effective treatment for obesity in adolescents.

## METHODS AND ANALYSIS

### Study design

A two-arm, double-blind, placebo-controlled, randomised clinical trial with obese adolescents randomly assigned to either treatment (encapsulated gut microbiome) or placebo (encapsulated saline solution), stratified by sex. Eligible participants will be followed for 26 weeks post randomisation (Figure 1). This trial protocol is reported as per the SPIRIT guidelines<sup>32</sup>.

### Recruitment and eligibility criteria

#### *Donors*

We will recruit 8 donors (4 males and 4 females), as recipients will only receive gut microbiome from donors of the same sex. This is to enhance microbial variability and standardise the treatment via gut microbiome transfer. Treatment with gut microbiome from donors of the same sex will be done as there may be potentially sex-specific differences in the effect of gut microbiome on weight and metabolism as described by Markle et al.<sup>33</sup>. Donors will be selected based on strict inclusion criteria (Table 1). Eligible donors will be identified by word of mouth, the internal email system at the University of Auckland, and social media networks. Potential donors will be given a detailed information sheet about the study that includes a consent form.

1  
2  
3 To eliminate the risks of transmission of infectious diseases we will use screening procedures equivalent  
4 to those used for blood donation in New Zealand<sup>34</sup>, and also screen donors for potential faecal pathogens  
5 or multidrug-resistant organisms. As part of this regimen, all potential donors will undergo extensive  
6 testing for human pathogens, antigens, and antibodies (that indicate exposure to hepatitis A, B, or C  
7 viruses, and human immunodeficiency virus), syphilis, *C. difficile*, *Helicobacter pylori*, other bacterial  
8 and viral pathogens, multidrug-resistant organisms, as well as intestinal parasites. We will supplement  
9 these microbiological tests with characterisation of the gut microbiome through analysis of the  
10 metagenome and metatranscriptome<sup>35</sup>. In addition, we will conduct an interview to gather information  
11 about behaviours or activities that may exclude them from the trial (Table 1).  
12  
13  
14  
15  
16  
17

18  
19 Given evidence that irritable bowel syndrome (IBS) may be related to the gut microbiome, it is important  
20 to exclude potential donors who may have IBS. The Rome criteria are an accepted clinical tool to identify  
21 individuals with IBS, but they are relatively insensitive so that strict adherence to those criteria would  
22 potentially allow for individuals with mild IBS to donate<sup>36</sup>. Therefore, we will screen for IBS using a  
23 conservative modification of the Rome criteria, where we define a positive screen as having 3 or more  
24 episodes of abdominal pain per month as described in part I of the criteria, as well as an additional  
25 symptom as defined in part II<sup>37</sup>.  
26  
27  
28  
29  
30

31 Each donor is expected to produce a wet stool sample weighing 100-150 g. Our preliminary laboratory  
32 data indicate that an average stool sample from a donor will generate sufficient gut microbiome material  
33 for two same-sex recipients. Stool samples will be collected and immediately processed for encapsulation.  
34 Capsules from each sample will be individually coded, so that each recipient will receive an equal number  
35 of capsules (n=7) from each of the four same sex donors.  
36  
37  
38  
39

#### 40 *Participants (recipients)*

41  
42  
43 We will recruit 80 obese adolescents as per inclusion and exclusion criteria described in Table 2. Eligible  
44 recipients will be recruited via social media, word of mouth, and paediatric endocrinology clinics in  
45 Auckland. Potential recipients and caregivers will be given a detailed information sheet about the study  
46 that includes a consent form. Consent will be obtained from recipients if they are aged  $\geq 16$  years and  
47 from their parents if aged  $< 16$  years. Younger recipients will also be asked to sign an assent form. All  
48 consent and/or assent will be obtained by the researchers prior to the recipient's participation in the trial.  
49 All potential and enrolled recipients' personal information are recorded and kept in a secure folder and  
50 only accessible to the researchers, in order to protect their confidentiality.  
51  
52  
53  
54  
55  
56  
57

#### 58 **Specimen collection**

1  
2  
3 The donor gut microbiome will be double encapsulated and administered to recipients by the oral route,  
4 which delivers bacteria to the proximal bowel. Thus, we will not require the use of invasive techniques  
5 (*i.e.* naso-duodenal tube) for gut microbiome transfer. Instead, gut microbiome transfer will be performed  
6 as per recent studies<sup>18 19</sup>, which demonstrated that an encapsulated microbiome was a viable treatment  
7 option for recurrent or refractory *C. difficile* colitis, without noticeable side effects.  
8  
9

10  
11  
12 We have validated methods for gut microbiome isolation, preparation, and double encapsulation as  
13 detailed by Youngster et al.<sup>18</sup>. Briefly, immediately after donation, stools are placed in normal saline,  
14 blended, and sieved to remove particulate matter. Samples are then differentially centrifuged to isolate a  
15 bacterial pellet. The bacterial pellet is suspended in normal saline (containing 15% glycerol – a  
16 cryoprotectant) at 0.5 g wet weight/ml before being dispensed into size 0 DRcaps<sup>TM</sup> capsules (Capsugel  
17 Inc, Sydney, Australia). The size 0 capsules are closed and secondarily sealed in size 00 DRcaps<sup>TM</sup>  
18 capsules. These capsules mask taste, odour, and visual appearance, and are designed to remain intact  
19 during passage through the stomach, delivering their contents to the intestine<sup>38-40</sup>. Capsules are stored  
20 frozen at -80°C.  
21  
22  
23  
24  
25  
26  
27

28 The use of low-speed centrifugation to pellet the bacterial cells is a feature of this methodology that  
29 reduces the risk of having free viruses<sup>41</sup> included into the treatment capsules. Storage (-80°C, <175 days<sup>18</sup>  
30 <sup>19</sup>) of microbiome capsules provides time to complete rigorous safety testing using microbiological and  
31 microscopic analyses.  
32  
33  
34  
35

### 36 **Randomisation, allocation, and blinding**

37  
38

39 Eligible participants will be randomised in a 1:1 ratio to either treatment or placebo group, stratified by  
40 sex, using block randomisation with variable block sizes of 2 and 4<sup>42</sup>. Randomisation sequences will be  
41 computer generated, and overseen by the biostatistician. Researchers and participants will be blinded to  
42 capsule contents, both of which (placebo and gut microbiome) look identical (white).  
43  
44  
45  
46

47 There are three steps in the blinding and allocation process. First, the independent research nurse allocates  
48 the recipient to group A or B using the randomisation sequence. Second, the placebo and treatment  
49 capsule packs each have a unique code (assigned by the technician who encapsulated them). Lastly, the  
50 independent research nurse allocates the pack according to the unique code associated with the  
51 randomisation sequence.  
52  
53  
54  
55

56 To maintain the integrity of the trial evaluation, statistical analyses will be performed at the completion  
57 of the study on encoded data (*i.e.* Group A vs Group B), so that the biostatistician will be blinded to  
58 treatment allocation. Recipients will be asked if they are able to identify the contents of capsules taken  
59  
60



1  
2  
3 (i.e. placebo or gut microbiome) at 6 weeks and 26 weeks. The effectiveness of treatment blinding will  
4 be assessed using the Bang's blinding index<sup>43</sup>. Blinding success will be determined by the thresholds of  
5 Moroz et al.<sup>44</sup>: unblinded ( $BBI \geq 0.2$ ); random guesses ( $-0.2 < BBI < 0.2$ ); or opposite guesses ( $BBI \leq$   
6  $-0.2$ ).  
7  
8

9  
10 Recipients will be unblinded in the case of any serious adverse events. These include on-going  
11 gastrointestinal bleeding, severe vomiting and/or diarrhoea, treatment related systemic infection,  
12 treatment related severe allergic reaction, coma, collapse and death. Unblinding will be done by an  
13 independent researcher who did not have any prior contact with the recipient, who will be able to  
14 determine the individual's treatment allocation.  
15  
16  
17  
18

### 19 20 **Study intervention**

21  
22  
23 All recipients will undergo bowel cleansing prior to treatment using an oral solution containing 70 g of  
24 Glycoprep-C<sup>®</sup> (active ingredient macrogol 3350) (Fresenius Kabi Australia Pty Ltd., Mount Kuring-gai,  
25 Australia). Bowel cleansing reduces gut microbial population by 31-fold and markedly reduces bacterial  
26 diversity<sup>45</sup>. This procedure was used in a pilot study of gut microbiome transfer in adults with type 2  
27 diabetes<sup>20</sup>. Diminishing the undesirable microbial community means that the donor bacteria are more  
28 likely to become established in the recipient's bowel<sup>20</sup>.  
29  
30  
31  
32

33  
34 Recipients will be advised to take the Glycoprep-C<sup>®</sup> solution between 4 pm and 6 pm the day before the  
35 treatment begins. It is expected that watery stools will follow for several hours to achieve bowel cleansing.  
36 Recipients will attend clinic early next morning, when each recipient in the placebo group will ingest  
37 saline capsules, while those in the treatment group will receive gut microbiome capsules. Each recipient  
38 will receive a total of 28 capsules (approximately 14 ml of frozen microbial suspension or saline)  
39 administered over two consecutive mornings under direct supervision from research staff<sup>18</sup>, specifically  
40 16 capsules in the first morning and 12 capsules in the second morning. Recipients will be fasting  
41 overnight for at least 8 hours prior to taking each set of capsules at clinic in the following morning.  
42 Capsules will be stored at  $-80^{\circ}\text{C}$ , and later transferred into a freezer at  $-30^{\circ}\text{C}$  in the morning of  
43 administration. Immediately before administration, treatment capsules will be placed onto gel packs at  
44  $4^{\circ}\text{C}$  to prevent harm to recipients upon swallowing. After treatment, all recipients will remain fasting for  
45 another 2 hours. Recipients will be advised not to change their diet, physical activity, and behaviour  
46 during the trial. All recipients will receive the same number of capsules from the four same-sex donors  
47 to standardized treatment and to ensure that overall donor microbiome diversity is increased and delivered  
48 in a reproducible fashion.  
49  
50  
51  
52  
53  
54  
55  
56  
57  
58  
59  
60

## Data collection and follow-up

### *Timing of assessments*

Recipients will be assessed four times over the course of the study: at baseline, 6 weeks, 12 weeks, and 26 weeks. Longitudinal follow-up over 26 weeks will establish the duration of the effect. The specific assessments that will be carried out at each time point are outlined in Table 3. Treatment (*i.e.* intake of capsules) will be administered within a week of the baseline assessment.

Clinical assessments will start between 07:00 am and 09:00 am at the Maurice & Agnes Paykel Clinical Research Unit (Liggins Institute, University of Auckland), after an overnight fast and no strenuous activity over the previous 24 hours.

All the recipients will be contacted and reminded of their follow-up visits via emails and text messages. Any recipient having difficulties to attend their assessment visit will be given the option to re-schedule it to a suitable time.

### *Insulin sensitivity and other blood tests*

Insulin sensitivity will be assessed in all recipients using the Matsuda index from a 75-g oral glucose tolerance test (OGTT)<sup>46</sup>. Blood samples will be collected at -10, 0, 30, 60, 90, and 120 minutes for glucose and insulin measurements. The Matsuda index is highly correlated with the hyperinsulinaemic euglycaemic clamp (the gold-standard assessment of insulin sensitivity<sup>47</sup>) and has excellent reproducibility during multiple measures<sup>48</sup>. Other markers of glycaemic control will also be measured, namely homeostasis model assessment of insulin resistance (HOMA-IR)<sup>49</sup> and glycated haemoglobin (HbA1c).

### *Other blood tests*

Fasting blood samples will be taken during the insulin sensitivity assessment to measure a number of other parameters. These will include markers of metabolic syndrome, such as uric acid, high-sensitivity C-reactive protein (hsCRP), and fasting lipids (*i.e.* total cholesterol, high-density lipoprotein cholesterol [HDL-C], low-density lipoprotein cholesterol [LDL-C], and triglycerides). Liver function will be assessed by measurement of gamma-glutamyl transferase (GGT), alkaline phosphatase (ALP), alanine aminotransferase (ALT), and aspartate transaminase (AST).

### *Anthropometry and body composition*

1  
2  
3  
4 Height will be measured to the nearest mm using a Harpenden stadiometer. Recipients will be asked to  
5 undo any hairstyle that might interfere with the measurements; they will stand with their feet together,  
6 with their back straight, and their heels in the same upright plane as the back of the head. Gentle upward  
7 traction on the mastoid process will be applied to straighten out the spine. Weight will be measured on a  
8 weighing scale (WM206, Wedderburn, Auckland, New Zealand) to the nearest 10 g. For weight  
9 measurements, the scale will be placed on a solid level floor, with recipients stepping on it with both feet  
10 at its centre. Both height and weight will be measured three times and the median value used for analysis;  
11 recipients will also be asked to remove shoes and bulky clothing, and to empty their pockets of any  
12 objects. Both the scale and stadiometer at our clinical research unit are checked on a weekly basis using  
13 the appropriate standards.  
14  
15  
16  
17  
18  
19  
20  
21

22 BMI will be calculated and transformed into standard deviations scores (SDS) adjusted for age and sex,  
23 based on WHO standards<sup>50</sup>. Waist and hip circumferences will be measured as per guidelines from the  
24 World Health Organization<sup>51</sup>. Both the waist and hip circumference measurements will be performed  
25 three times and the median value used for analysis. Both measurements will be made to the nearest mm  
26 with a standard measuring tape parallel to the floor, which is placed snugly around the recipient but  
27 without compressing the skin<sup>52</sup>. Body composition will be assessed using whole-body dual-energy X-ray  
28 absorptiometry (DXA, Lunar Prodigy<sup>TM</sup> and Lunar iDXA<sup>TM</sup>, GE Medical Systems, Chicago, Illinois,  
29 USA). Recipients will have all longitudinal body composition data collected on the same device.  
30  
31  
32  
33  
34  
35

### 36 *Blood pressure*

37  
38

39 Clinic resting systolic and diastolic blood pressures will be measured at all assessments using the same  
40 oscillometric digital blood pressure monitor (ri-champion<sup>®</sup> N; Riester, Jungingen, Germany) with an  
41 appropriately-sized cuff on the extended non-dominant arm. All measurements will be recorded on each  
42 recipient while seated and after a 5-minute rest. Blood pressure will be measured three times, and the  
43 median value used for analysis.  
44  
45  
46  
47  
48

49 In addition, 24-hour ambulatory blood pressure monitoring will be performed at baseline and at 6 weeks,  
50 using an oscillometric device (Spacelabs 90217; Spacelabs Medical Inc, Redmond, Washington, USA)  
51 on the non-dominant arm. Over a 24-hour period, blood pressure will be measured every 20 minutes when  
52 the recipients are expected to be awake, and every 30 minutes when they are likely to be asleep (based  
53 on self-reported information). Recipients will be asked to record the time they go to bed and the time they  
54 wake up over the period of monitoring, so that waking and sleeping times can be more accurately  
55 identified.  
56  
57  
58  
59  
60

### *Dietary intake*

A dietary record describing all foods and fluids consumed over three days will be collected at the 6-week assessment. Recipients will be asked to describe all foods and fluids consumed in detail including brand names, types of foods (e.g. low fat), and cooking methods. Quantities will be described using standard household measures, as well as the information from food labels (where appropriate). Recipients will be provided with standardized instructions for completing the dietary record by a trained investigator, who will also review individual records with recipients to clarify errors, omissions, questionable entries, or unclear descriptions. These dietary records will be entered into FoodWorks software (v9.0, Xyris Software, Brisbane, Australia) by a trained investigator.

The New Zealand Adolescent Food Frequency Questionnaire (NZAFFQ)<sup>53</sup> will be administered at baseline and weeks 6, 12, and 26. The NZAFFQ was developed for and validated in New Zealand adolescents aged 14 to 18 years<sup>53</sup>.

### *Physical activity levels*

These will be measured using two questionnaires:

- International Physical Activity Questionnaire (IPAQ)<sup>54</sup> – it covers four domains of physical activity, namely work-related, transportation, housework/gardening, and leisure time.
- Adolescent Sedentary Activity Questionnaire (ASAQ)<sup>55</sup> – it covers a number of sedentary activities across five categories (small screen recreation, education, travel, cultural activities, and social activities).

### *Health-related quality of life*

This will be assessed using:

- EPOCH Measure of Adolescent Well-Being<sup>56</sup> – it provides an assessment of five positive psychological characteristics (engagement, perseverance, optimism, connectedness, and happiness).
- Pediatric Quality of Life Inventory (PedsQL)<sup>57</sup> – we will adopt only the teen and young adult self-reports (*i.e.* not the parent-proxy), which assess problems over the preceding month relating to physical, emotional, social, and school functioning.

1  
2  
3 In addition, we will assess symptoms of irritable bowel syndrome<sup>58</sup> and bowel movements using the  
4 Birmingham IBS symptom questionnaire and bowel movements questionnaire respectively. The  
5 Birmingham IBS symptom questionnaire is a self-administered 11-item symptom questionnaire that is  
6 scored using the Rome II criteria<sup>58</sup>. The bowel movement questionnaire was designed for this trial to  
7 assess and monitor changes pre and post treatment.  
8  
9

### 10 11 12 *Gut microbial composition* 13

14  
15 Sample collection will be performed at baseline prior to treatment and at 6 weeks, 12 weeks and 26 weeks  
16 post-treatment. Briefly, the participant will be given the bedpan liner (Onelink). They will be asked to: i)  
17 pass urine into the toilet prior to placing the tray on the toilet seat; ii) pass the stools; iii) cover the tray  
18 and leave it in the bathroom for immediate collection by a research team member. Using a small spatula,  
19 samples will be collected from three different areas of the stool (proximal, middle, and distal) and inserted  
20 into specimen containers (Onelink). The specimen containers will be immediately placed on ice and taken  
21 to the laboratory where they will be frozen and stored at -80°C. DNA and RNA extraction will be  
22 completed within 5 days of donation. Time to processing will be recorded.  
23  
24  
25  
26  
27  
28

29  
30 All extractions will be performed using Qiagen-AllPrep DNA/RNA mini kit®, due to variation in  
31 extraction efficiencies with the different kits<sup>59</sup>. However, once the DNA or RNA is extracted and  
32 archived, we will have a relatively stable record of the composition and activity of the flora.  
33  
34  
35

36 Frozen faeces (~200 mg; weights will be recorded) will be subsampled from original faecal samples. All  
37 DNA and RNA isolations will be performed in a disinfected class II hood at room temperature. Briefly,  
38 stool samples will be incubated (10 min, room temperature) with vortexing (30 sec every 2 minutes) and  
39 treated with RLT Plus buffer (1.2mL; Qiagen) and 12µL beta-mercaptoethanol (Sigma-Aldrich). Acid-  
40 washed glass beads [1 ml; ≤106 µm (-140 U.S. sieve) (Sigma-Aldrich)] will be added to each sample and  
41 vortexed (10 min) on a TissueLyzer II (Qiagen). The supernatant will be removed and added to a  
42 QIAshredder spin column (Qiagen) and centrifuged (9000 rpm, 2 min, room temperature). The eluent  
43 will be added to an AllPrep DNA (Qiagen) spin column and centrifuged (30 sec, 14000 rpm, room  
44 temperature). The eluent and AllPrep DNA spin columns will be used for RNA and DNA extraction,  
45 respectively, according to the manufacturer's instructions. Finally, DNA and RNA will be eluted with  
46 EB buffer and RNase-free water, respectively, and aliquots stored at -80°C for downstream mixed omics  
47 analysis.  
48  
49  
50  
51  
52  
53  
54

55  
56 A series of blank samples (sterile saline) will be extracted in parallel to sample extractions to enable  
57 contamination testing. We will also extract ZymoBIOMICS™ Microbial Community Standard I (Even,  
58 Cellular Mix; Catalog #D6300) to determine potential bias in the extraction process.  
59  
60

1  
2  
3  
4 For 16S amplicon sequencing, library preparation will be performed using an Illumina platform by a  
5 commercial provider (to be determined) using standard protocols for the SV3-4 region. Shotgun  
6 metagenomics sequencing will be performed by a commercial provider (to be determined).  
7  
8  
9

10 All raw sequencing files will be cleaned to remove adaptors and primer sequences, and trimmed for  
11 sequence quality (Phred score<30).  
12  
13  
14

15 Longitudinal analysis of gut microbiome data (i.e. change in alpha and beta diversity from baseline to 26  
16 weeks in treatment and placebo group) will be performed on Qiime2 (version 2018.4 or later) using  
17 default parameters<sup>60</sup>. PERMANOVA and Multivariate Association with Linear Models using MaAsLin  
18 (version 0.0.4; or later)<sup>61</sup> will be used to identify any significant differences in gut microbial communities  
19 and structure between treatment groups.  
20  
21  
22  
23

24 Metagenomic sequencing data will be analysed using default parameters of the HMP Unified Metabolic  
25 Analysis NETwrok (HuMAN2) (version 2; or later)<sup>62</sup> after removal of short reads (minimum length 50  
26 bases, trimmomatic version 0.33 or later<sup>63</sup>) and human sequences using BMTagger<sup>64</sup>. MaAsLin (version  
27 0.0.4; or later)<sup>61</sup> will be used to identify significant associations between microbial compositions,  
28 metabolomics data, and microbial functions.  
29  
30  
31  
32  
33

### 34 **Safety monitoring**

35  
36  
37 An independent safety monitoring committee has been established. All recipients are advised to remain  
38 under supervision in the clinical research unit for one hour after initial treatment and we will adopt robust  
39 exclusion and screening criteria for donors (as previously described). In addition, recipients' data will be  
40 monitored by the research team and the safety committee throughout the study for any adverse events, in  
41 particular gastrointestinal symptoms and possible allergies. All potential adverse events will be recorded.  
42 If any recipient suffers harm as a result of trial participation, they will be eligible to apply for  
43 compensation from the Accident Compensation Cooperation (ACC), which is a compulsory insurance  
44 cover for personal injury for everyone in New Zealand.  
45  
46  
47  
48  
49  
50

51 If any concerns are identified during screening or clinical assessment of donors or recipients, further  
52 clinical evaluation and/or investigation will be immediately undertaken. If concerns are identified during  
53 the study, the recipient will be withdrawn if this is thought to be in their best interest.  
54  
55  
56  
57

### 58 **Outcome measures**

### *Primary outcome*

- BMI SDS at 6 weeks.

### *Secondary outcomes*

- BMI SDS at 12, and 26 weeks
- total body fat percentage (from DXA) at 6, 12, and 26 weeks
- insulin sensitivity at 6, 12, and 26 weeks
- gut microbial composition at 6, 12, and 26 weeks
- liver function at 6, 12, and 26 weeks
- lipid profile at 6, 12, and 26 weeks
- inflammatory markers [uric acid, high-sensitivity C-reactive protein (hsCRP)] at 6, 12, and 26 weeks
- blood pressure at 6, 12, and 26 weeks
- health-related quality of life at 6, 12, and 26 weeks
- IBS symptoms at 6, 12, and 26 weeks
- bowel movements at 6, 12, and 26 weeks

### **Sample size and power calculation**

Power calculation was based on data from a cohort of 50 obese adolescents in Australia aged 14–18 years, with a pooled mean BMI SDS of 2.5 and standard deviation of 0.27 at baseline<sup>65</sup>. A study with 32 recipients per group will have 80% power at 5% significance level (two-sided) to detect a group difference of 0.19 in BMI SDS at 6 weeks after gut microbiome transfer, which is equivalent to a difference in weight of approximately 2 kg. To account for an approximate 20% loss to follow-up, we aim to recruit 40 treatment and 40 control recipients.

### **Data management**

All data collected will be entered and stored in password-protected web-based platforms. Rules for data validation will be in place to minimize human error, and all data entered by members of the research team will be double-checked by the database administrator to ensure accuracy of stored records. Only the researchers involved in the trial will have access to the final trial dataset.

### **Statistical analyses**

Treatment evaluation will be performed on the principle of intention to treat, using data collected from all randomised recipients. Baseline demographics and clinical characteristics of recipients will be

1  
2  
3 summarised by randomised group. The distribution of outcome measures will be first evaluated at  
4 scheduled visits using descriptive statistics. Generalised linear regression models will be used to assess  
5 treatment effects between groups, adjusting for the baseline outcome value <sup>66</sup> and sex (stratification  
6 factor). Model-adjusted estimates and the differences between the two groups will be calculated with 95%  
7 confidence intervals. Random effects mixed models will be used to evaluate the outcomes measured  
8 repeatedly over time, controlling for correlated data collected from the same recipient. Planned subgroup  
9 analysis by sex will be conducted on primary and secondary outcomes to evaluate the consistency of main  
10 treatment effects in males and females.  
11  
12  
13  
14  
15  
16

17 Missing data on the primary outcome will be imputed using multiple imputations, which create multiple  
18 imputed datasets for the incomplete outcome variable that are analyzed using same regression models  
19 and combined for one inference. The Markov chain Monte Carlo (MCMC) method will be used to  
20 produce the parameter estimates, assuming the data are from a multivariate normal distribution and are  
21 missing at random. The SAS procedure, PROC MI, will be used which runs 200 iterations of the algorithm  
22 before selecting the first completed data set, and then allows 100 iterations between each successive data  
23 set. The default minimum number of imputations is 5, and we plan to run 30 to allow for both within and  
24 between imputation variances.  
25  
26  
27  
28  
29  
30

31 Per-protocol analyses will be carried out on those recipients without major protocol violations. A protocol  
32 deviation form will be used to record all major protocol deviations, and reviewed in a blinded fashion by  
33 the trial steering group prior to final data lock. The per-protocol population will be analysed using same  
34 regression models as the primary intention-to-treat (ITT) population to test the robustness of main trial  
35 findings.  
36  
37  
38  
39  
40

41 Our secondary analyses will include the examination of potential effects of diet (e.g. fibre intake) and  
42 physical activity levels on study outcomes. Data analyses will be performed in SAS v.9.4 (SAS Institute,  
43 Cary, NC, USA), SPSS v25 (IBM Corp, Armonk, NY, USA), and/or Minitab v.16 (Pennsylvania State  
44 University, State College, PA, USA). All statistical tests will be two-sided at  $p < 0.05$ , with no adjustments  
45 for multiple comparisons. The CONSORT 2010 guidelines will be followed in reporting the main trial  
46 results.  
47  
48  
49  
50

## 51 **Study status**

52  
53  
54 The recruitment of recipients for the trial began in Oct 2017. It is expected that the study will be completed  
55 in mid-2019.  
56  
57  
58  
59

## 60 **Patient and public involvement**



1  
2  
3  
4 Public input into the study design was provided in open meetings by the Northern A Health and Disability  
5 Ethics Committee, whose membership includes both clinical and lay persons, as well as Māori  
6 representatives (New Zealand indigenous people). Information on the trial was subsequently made  
7 available on social media platforms (e.g. Facebook), which allowed participants to read and contact the  
8 researchers if they wanted to participate. Participants were not involved in the development, recruitment  
9 of other participants, or conduct of the trial. All recipients will be asked about any possible adverse effects  
10 of treatment at specific time points throughout the trial; if any serious adverse effects are reported, a  
11 thorough follow-up will be conducted to investigate the incident. After completion of data analyses, all  
12 recipients will receive information about their individual results.  
13  
14  
15  
16  
17  
18  
19

## 20 **ETHICS AND DISSEMINATION**

21  
22  
23 Ethics approval for this study was granted in November 2016 by the Northern A Health and Disability  
24 Ethics Committee (Ministry of Health, New Zealand; 16/NTA/172). Involvement in this trial will be  
25 entirely voluntary. If a recipient agrees to take part, they will be free to withdraw from the study at any  
26 time. In addition, the participant will be withdrawn if the research team believes their ongoing  
27 involvement in the study is not in their best interest. Donors and recipients will be required to provide  
28 written informed consent prior to participation in the study. The Ethics Committee requires that a yearly  
29 progress report is submitted, which must disclose any protocol violations.  
30  
31  
32  
33  
34  
35

36 Clinical and biochemical data will be entered into secure databases protected by passwords, with access  
37 restricted to investigators. Recipients and caregivers will be informed of incidental findings on  
38 unrecognized conditions (e.g. diabetes), with further medical follow-up arranged. Importantly, if at the  
39 end of the trial we find that gut microbiome transfer leads to a statistically significant improvement in  
40 key health outcomes, the treatment will be offered to all recipients who received placebo. Recipients and  
41 caregivers will also be provided with information on individual results.  
42  
43  
44  
45  
46

47 Communication to the scientific community will be through high-profile international research meetings,  
48 as well as relevant national and regional meetings. We aim to publish findings in high-impact peer-  
49 reviewed international journals. Further, the research team will communicate the findings to the general  
50 public in New Zealand and overseas through our institution's Communications Manager. Relevant  
51 findings will be shared with the community in a culturally appropriate manner.  
52  
53  
54  
55

## 56 **REGISTRATION DETAILS**

This study is registered with the Australian New Zealand Clinical Trials Registry (ACTRN: ACTRN12615001351505). In addition, the Universal Trial Number (UTN), World Health Organization, has been obtained (U1111-1176-6753).

**Author contributions:** WSC, JMO, JGBD, KSWL, BBA, VC, DJH, DMS, TNJ, YJ, KLB, CAC, WS, and TV contributed to the conception and design of the study. KSWL, JGBD, WSC, JMO, TNJ, BBA, and VC drafted the protocol with input from all other authors.

**Acknowledgements:** We thank Wendy Ranson, Yara Gerber, Janene Biggs, and for their valuable assistance during the development of this trial, and Khan Safayet Hossin for help with the database.

**Funding:** This research received funding from the Rockfield Trust and A Better Start – National Science Challenge. VC was supported by a Long-Term Research Fellowship from the European Society for Paediatric Endocrinology (ESPE), TNJ received a University of Auckland Scholarship, and BBA is supported by a Maurice Paykel Research Fellowship.

**Competing interests:** None declared.

## REFERENCES

1. World Health Organization. Ending Childhood Obesity Report of The Commission on Ending Childhood Obesity. Geneva, 2016.
2. The NS, Suchindran C, North KE, *et al.* Association of adolescent obesity with risk of severe obesity in adulthood. *JAMA* 2010;304:2042-7.
3. Guo SS, Roche AF, Chumlea WC, *et al.* The predictive value of childhood body mass index values for overweight at age 35 y. *Am J Clin Nutr* 1994;59:810-9.
4. Halfon N, Larson K, Slusser W. Associations between obesity and comorbid mental health, developmental, and physical health conditions in a nationally representative sample of US children aged 10 to 17. *Academic Pediatr* 2013;13:6-13.
5. Engeland A, Bjorge T, Sogaard AJ, *et al.* Body mass index in adolescence in relation to total mortality: 32-year follow-up of 227,000 Norwegian boys and girls. *Am J Epidemiol* 2003;157:517-23.
6. Twig G, Yaniv G, Levine H, *et al.* Body-mass index in 2.3 million adolescents and cardiovascular death in adulthood. *N Engl J Med* 2016;374:2430-40.
7. Burcelin R, Serino M, Chabo C, *et al.* Metagenome and metabolism: the tissue microbiota hypothesis. *Diabetes Obes Metab* 2013;15:61-70.
8. Musso G, Gambino R, Cassader M. Obesity, diabetes, and gut microbiota: the hygiene hypothesis expanded? *Diabetes Care* 2010;33:2277-84.

- 1
- 2
- 3 9. Backhed F, Ding H, Wang T, *et al.* The gut microbiota as an environmental factor that regulates fat
- 4 storage. *Proc Natl Acad Sci U S A* 2004;101:15718-23.
- 5
- 6 10. Turnbaugh PJ, Backhed F, Fulton L, *et al.* Diet-induced obesity is linked to marked but reversible
- 7 alterations in the mouse distal gut microbiome. *Cell Host Microbe* 2008;3:213-23.
- 8
- 9 11. Backhed F, Manchester JK, Semenkovich CF, *et al.* Mechanisms underlying the resistance to diet-
- 10 induced obesity in germ-free mice. *Proc Natl Acad Sci U S A* 2007;104:979-84.
- 11
- 12 12. Turnbaugh PJ, Ridaura VK, Faith JJ, *et al.* The effect of diet on the human gut microbiome: a
- 13 metagenomic analysis in humanized gnotobiotic mice. *Sci Transl Med* 2009;1:6ra14.
- 14
- 15 13. Dumas ME, Barton RH, Toye A, *et al.* Metabolic profiling reveals a contribution of gut microbiota
- 16 to fatty liver phenotype in insulin-resistant mice. *Proc Natl Acad Sci U S A* 2006;103:12511-6.
- 17
- 18 14. Ma J, Zhou Q, Li H. Gut microbiota and nonalcoholic fatty liver disease: Insights on mechanisms and
- 19 therapy. *Nutrients* 2017;9
- 20
- 21 15. Evans JM, Morris LS, Marchesi JR. The gut microbiome: the role of a virtual organ in the
- 22 endocrinology of the host. *J Endocrinol* 2013;218:R37-47.
- 23
- 24 16. Hota SS, Achonu C, Crowcroft NS, *et al.* Determining mortality rates attributable to *Clostridium*
- 25 *difficile* infection. *Emerg Infect Dis* 2012;18:305-7.
- 26
- 27 17. van Nood E, Vrieze A, Nieuwdorp M, *et al.* Duodenal infusion of donor feces for recurrent
- 28 *Clostridium difficile*. *N Engl J Med* 2013;368:407-15.
- 29
- 30 18. Youngster I, Russell GH, Pindar C, *et al.* Oral, capsulized, frozen fecal microbiota transplantation for
- 31 relapsing *Clostridium difficile* infection. *JAMA* 2014;312:1772-8.
- 32
- 33 19. Hirsch BE, Saraiya N, Poeth K, *et al.* Effectiveness of fecal-derived microbiota transfer using orally
- 34 administered capsules for recurrent *Clostridium difficile* infection. *BMC Infect Dis* 2015;15:191.
- 35
- 36 20. Vrieze A, Van Nood E, Holleman F, *et al.* Transfer of intestinal microbiota from lean donors increases
- 37 insulin sensitivity in individuals with metabolic syndrome. *Gastroenterology* 2012;143:913-6 e7.
- 38
- 39 21. Weingarden A, Gonzalez A, Vazquez-Baeza Y, *et al.* Dynamic changes in short- and long-term
- 40 bacterial composition following fecal microbiota transplantation for recurrent *Clostridium difficile*
- 41 infection. *Microbiome* 2015;3:10.
- 42
- 43 22. Walker AW, Parkhill J. Microbiology. Fighting obesity with bacteria. *Science* 2013;341:1069-70.
- 44
- 45 23. Kootte RS, Levin E, Salojarvi J, *et al.* Improvement of insulin sensitivity after lean donor feces in
- 46 metabolic syndrome is driven by baseline intestinal microbiota composition. *Cell Metab*
- 47 2017;26:611-19.e6.
- 48
- 49 24. Alang N, Kelly CR. Weight gain after fecal microbiota transplantation. *Open Forum Infect Dis*
- 50 2015;2:ofv004.
- 51
- 52 25. Ridaura VK, Faith JJ, Rey FE, *et al.* Gut microbiota from twins discordant for obesity modulate
- 53 metabolism in mice. *Science* 2013;341:1241214.
- 54
- 55
- 56
- 57
- 58
- 59
- 60

- 1
- 2
- 3 26. Hill C, Guarner F, Reid G, *et al.* Expert consensus document. The International Scientific Association
- 4 for Probiotics and Prebiotics consensus statement on the scope and appropriate use of the term
- 5 probiotic. *Nat Rev Gastroenterol Hepatol* 2014;11:506-14.
- 6
- 7 27. Park S, Bae JH. Probiotics for weight loss: a systematic review and meta-analysis. *Nutr Res*
- 8 2015;35:566-75.
- 9
- 10 28. Sun J, Buys N. Effects of probiotics consumption on lowering lipids and CVD risk factors: A
- 11 systematic review and meta-analysis of randomized controlled trials. *Ann Med* 2015;47:430-40.
- 12
- 13 29. Liou AP, Paziuk M, Luevano JM, Jr., *et al.* Conserved shifts in the gut microbiota due to gastric
- 14 bypass reduce host weight and adiposity. *Sci Transl Med* 2013;5:178ra41.
- 15
- 16 30. Kassam Z, Lee CH, Yuan Y, *et al.* Fecal microbiota transplantation for *Clostridium difficile* infection:
- 17 systematic review and meta-analysis. *Am J Gastroenterol* 2013;108:500-8.
- 18
- 19 31. Colman RJ, Rubin DT. Fecal microbiota transplantation as therapy for inflammatory bowel disease:
- 20 a systematic review and meta-analysis. *J Crohns Colitis* 2014;8:1569-81.
- 21
- 22 32. Chan AW, Tetzlaff JM, Altman DG, *et al.* SPIRIT 2013 statement: defining standard protocol items
- 23 for clinical trials. *Ann Intern Med* 2013;158:200-7.
- 24
- 25 33. Markle JG, Frank DN, Mortin-Toth S, *et al.* Sex differences in the gut microbiome drive hormone-
- 26 dependent regulation of autoimmunity. *Science* 2013;339:1084-88.
- 27
- 28 34. New Zealand Blood Service. Detailed eligibility criteria. 2015.
- 29
- 30 35. Bibby K, Peccia J. Identification of viral pathogen diversity in sewage sludge by metagenome
- 31 analysis. *Environ Sci Technol* 2013;47:1945-51.
- 32
- 33 36. Lacy BE, Patel NK. Rome criteria and a diagnostic approach to irritable bowel syndrome. *J Clin Med*
- 34 2017;6:E99.
- 35
- 36 37. Vanner SJ, Depew WT, Paterson WG, *et al.* Predictive value of the Rome criteria for diagnosing the
- 37 irritable bowel syndrome. *Am J Gastroenterol* 1999;94:2912-7.
- 38
- 39 38. Marzorati M, Possemiers S, Verhelst A, *et al.* A novel hypromellose capsule, with acid resistance
- 40 properties, permits the targeted delivery of acid-sensitive products to the intestine. *LWT Food Sci*
- 41 *Technol* 2015;60:544-51.
- 42
- 43 39. Miller DS, Parsons AM, Bresland J, *et al.* A simple and inexpensive enteric-coated capsule for
- 44 delivery of acid-labile macromolecules to the small intestine. *J Zhejiang Univ-Sci B* 2015;16:586-
- 45 92.
- 46
- 47 40. Amo R. DRcaps® capsules achieve delayed release properties for nutritional ingredients in human
- 48 clinical study: Capsugel Inc, 2014.
- 49
- 50 41. Bourdin G, Schmitt B, Marvin Guy L, *et al.* Amplification and purification of T4-like *Escherichia*
- 51 *coli* phages for phage therapy: from laboratory to pilot scale. *Appl Environ Microbiol* 2014;80:1469-
- 52 76.
- 53
- 54 42. Sealed Envelope Ltd. Create a blocked randomisation list 2016 [Available from:
- 55 <https://www.sealedenvelope.com/simple-randomiser/v1/lists> accessed 3 Mar 2017.
- 56
- 57
- 58
- 59
- 60

- 1
- 2
- 3 43. Bang H, Ni L, Davis CE. Assessment of blinding in clinical trials. *Control Clin Trials* 2004;25:143-
- 4 56.
- 5
- 6 44. Moroz A, Freed B, Tiedemann L, *et al.* Blinding measured: a systematic review of randomized
- 7 controlled trials of acupuncture. *Evid Based Complement Alternat Med* 2013;2013:708251.
- 8
- 9 45. Jalanka J, Salonen A, Salojarvi J, *et al.* Effects of bowel cleansing on the intestinal microbiota. *Gut*
- 10 2015;64:1562-8.
- 11
- 12 46. Matsuda M, DeFronzo RA. Insulin sensitivity indices obtained from oral glucose tolerance testing:
- 13 comparison with the euglycemic insulin clamp. *Diabetes Care* 1999;22:1462-70.
- 14
- 15 47. Lorenzo C, Haffner SM, Stančáková A, *et al.* Relation of direct and surrogate measures of insulin
- 16 resistance to cardiovascular risk factors in nondiabetic finnish offspring of type 2 diabetic
- 17 individuals. *J Clin Endocrinol Metab* 2010;95:5082-90.
- 18
- 19 48. Maki KC, Rains TM, Dicklin MR, *et al.* Repeatability of indices of insulin sensitivity and secretion
- 20 from standard liquid meal tests in subjects with type 2 diabetes mellitus or normal or impaired fasting
- 21 glucose. *Diabetes Technol Ther* 2010;12:895-900.
- 22
- 23 49. Wallace TM, Levy JC, Matthews DR. Use and abuse of HOMA modeling. *Diabetes Care*
- 24 2004;27:1487-95.
- 25
- 26 50. de Onis M, Onyango AW, Borghi E, *et al.* Development of a WHO growth reference for school-aged
- 27 children and adolescents. *Bull World Health Organ* 2007;85:660-7.
- 28
- 29 51. World Health Organization. Waist circumference and waist-hip ratio: report of a WHO expert
- 30 consultation, Geneva, 8–11 December 2008. Geneva, 2008.
- 31
- 32 52. National Center for Health Statistics. National Health and Nutrition Examination Survey III - Body
- 33 Measurements (Anthropometry). Rockville, MD, USA: Centers for Disease Control and Prevention,
- 34 1988.
- 35
- 36 53. Wong JE, Parnell WR, Black KE, *et al.* Reliability and relative validity of a food frequency
- 37 questionnaire to assess food group intakes in New Zealand adolescents. *Nutr J* 2012;11:65.
- 38
- 39 54. Hagstromer M, Oja P, Sjostrom M. The International Physical Activity Questionnaire (IPAQ): a study
- 40 of concurrent and construct validity. *Public Health Nutr* 2006;9:755-62.
- 41
- 42 55. Hardy LL, Booth ML, Okely AD. The reliability of the Adolescent Sedentary Activity Questionnaire
- 43 (ASAQ). *Prev Med* 2007;45:71-4.
- 44
- 45 56. Kern ML, Benson L, Steinberg EA, *et al.* The EPOCH Measure of Adolescent Well-Being. *Psychol*
- 46 *Assess* 2016;28:586-97.
- 47
- 48 57. Varni JW, Seid M, Knight TS, *et al.* The PedsQL 4.0 Generic Core Scales: sensitivity, responsiveness,
- 49 and impact on clinical decision-making. *J Behav Med* 2002;25:175-93.
- 50
- 51 58. Roalfe AK, Roberts LM, Wilson S. Evaluation of the Birmingham IBS symptom questionnaire. *BMC*
- 52 *Gastroenterol* 2008;8:30.
- 53
- 54
- 55
- 56
- 57
- 58
- 59
- 60

- 1  
2  
3 59. Claassen S, du Toit E, Kaba M, *et al.* A comparison of the efficiency of five different commercial  
4 DNA extraction kits for extraction of DNA from faecal samples. *J Microbiol Methods* 2013;94:103-  
5 10.  
6  
7  
8 60. Caporaso JG, Kuczynski J, Stombaugh J, *et al.* QIIME allows analysis of high-throughput community  
9 sequencing data. *Nature Methods* 2010;7:335.  
10  
11 61. Morgan XC, Tickle TL, Sokol H, *et al.* Dysfunction of the intestinal microbiome in inflammatory  
12 bowel disease and treatment. *Genome Biol* 2012;13:R79.  
13  
14 62. Franzosa EA, McIver LJ, Rahnavard G, *et al.* Species-level functional profiling of metagenomes and  
15 metatranscriptomes. *Nature Methods* 2018:1.  
16  
17 63. Bolger AM, Lohse M, Usadel B. Trimmomatic: a flexible trimmer for Illumina sequence data.  
18 *Bioinformatics* 2014;30:2114-20.  
19  
20 64. Rotmistrovsky K, Agarwala R. BMTagger: Best Match Tagger for removing human reads from  
21 metagenomics datasets. Key: citeulike:9207261; 2011  
22  
23 65. O'Brien PE, Sawyer SM, Laurie C, *et al.* Laparoscopic adjustable gastric banding in severely obese  
24 adolescents: a randomized trial. *JAMA* 2010;303:519-26.  
25  
26 66. Committee for Medicinal Products for Human Use. Guideline on adjustment for baseline covariates  
27 in clinical trials. Report EMA/CHMP/295050/2013. London: European Medicines Agency, 2015.  
28  
29 67. Bakken JS, Borody T, Brandt LJ, *et al.* Treating *Clostridium difficile* infection with fecal microbiota  
30 transplantation. *Clin Gastroenterol Hepatol* 2011;9:1044-9.  
31  
32  
33  
34  
35  
36  
37  
38  
39  
40  
41  
42  
43  
44  
45  
46  
47  
48  
49  
50  
51  
52  
53  
54  
55  
56  
57  
58  
59  
60

**Table 1.** Inclusion and exclusion criteria for donors in the Gut Bugs Trial. Exclusion criteria adapted from Youngster et al., Hirsch et al., van Nood et al., and Bakken et al.<sup>17-19,67</sup>.

---

|                  |                                                                                                                                                                                                                                                                                                                                                                                                                                                                                                                                                                                                                                                                                                                                                                                                                                                                                                                                                                                                                                                                                                                                                                                                                                                                                                                                                                                                              |
|------------------|--------------------------------------------------------------------------------------------------------------------------------------------------------------------------------------------------------------------------------------------------------------------------------------------------------------------------------------------------------------------------------------------------------------------------------------------------------------------------------------------------------------------------------------------------------------------------------------------------------------------------------------------------------------------------------------------------------------------------------------------------------------------------------------------------------------------------------------------------------------------------------------------------------------------------------------------------------------------------------------------------------------------------------------------------------------------------------------------------------------------------------------------------------------------------------------------------------------------------------------------------------------------------------------------------------------------------------------------------------------------------------------------------------------|
| <b>Inclusion</b> | <ul style="list-style-type: none"> <li>• Age 18 to 28 years</li> <li>• BMI &gt;18.5 kg/m<sup>2</sup> and &lt;30.0 kg/m<sup>2</sup></li> <li>• Total body fat ≤29% for females and ≤19% for males</li> <li>• Regular exercise (moderate to vigorous physical activity for at least 3.5 hours per week)</li> <li>• Regular bowel habit (at least once every two days)</li> <li>• Intake of ≥4 portions of fruit and/or vegetables per day</li> </ul>                                                                                                                                                                                                                                                                                                                                                                                                                                                                                                                                                                                                                                                                                                                                                                                                                                                                                                                                                           |
| <b>Exclusion</b> | <ul style="list-style-type: none"> <li>• Any transmissible viral or bacterial pathogens, or intestinal parasites</li> <li>• Multidrug-resistant organisms (e.g. vancomycin-resistant enterococci, extended-spectrum beta-lactamase-producing Enterobacteriaceae, and carbapenem-resistant Enterobacteriaceae)</li> <li>• Gastrointestinal disease (including symptoms of irritable bowel syndrome, inflammatory bowel disease, or coeliac disease)</li> <li>• Atopic diseases requiring regular prophylaxis or treatment</li> <li>• Current or past history of malignancy</li> <li>• Impaired fasting glucose or impaired glucose tolerance</li> <li>• Type 1 diabetes, type 2 diabetes, or monogenic diabetes</li> <li>• Known dyslipidaemia, hypertension, or metabolic syndrome</li> <li>• Regular use of medications known to influence metabolism or the gut microbiome</li> <li>• Use of oral antibiotics in the past three months</li> <li>• Regular 'binge drinking', i.e. consumption of 5 or more standard drinks of alcohol per session, at least once a week</li> <li>• Any use of recreational drugs or tobacco</li> <li>• Current or past pregnancy</li> <li>• Overseas travel in previous 6 months, except for visits to Australia, UK, USA, Canada, Northern Europe, France, and Germany.</li> <li>• UK residence in 1980–1996 (due to risk of variant Creutzfeldt-Jakob disease)</li> </ul> |

---

**Table 2.** Inclusion and exclusion criteria for recipients in the Gut Bugs Trial.

---

|                  |                                                                                                                                                                                                                                                                                                                                                                                                                                                                                                                                                                                                                                                                                                                                                                                                                                                         |
|------------------|---------------------------------------------------------------------------------------------------------------------------------------------------------------------------------------------------------------------------------------------------------------------------------------------------------------------------------------------------------------------------------------------------------------------------------------------------------------------------------------------------------------------------------------------------------------------------------------------------------------------------------------------------------------------------------------------------------------------------------------------------------------------------------------------------------------------------------------------------------|
| <b>Inclusion</b> | <ul style="list-style-type: none"><li>• Aged 14 to 18 years</li><li>• BMI <math>\geq 30</math> kg/m<sup>2</sup></li><li>• Post-pubertal (Tanner stage 5)</li></ul>                                                                                                                                                                                                                                                                                                                                                                                                                                                                                                                                                                                                                                                                                      |
| <b>Exclusion</b> | <ul style="list-style-type: none"><li>• Gastrointestinal disease (including inflammatory bowel disease or coeliac disease)</li><li>• Use of regular medications that may influence weight, metabolism, or the gut microbiome (including oral oestrogen-containing contraceptives, antidepressants, glucose-lowering drugs, diet drugs, as well as inhaled, topical, or oral steroids)</li><li>• Consumption of probiotics</li><li>• Type 1 diabetes, type 2 diabetes, or monogenic diabetes</li><li>• Chronic diseases that could affect the primary outcome (other than obesity-related conditions)</li><li>• Food allergies</li><li>• Allergy to macrogol (active ingredient in the bowel preparation product)</li><li>• Allergy to any over-the-counter medication</li><li>• No antibiotic usage for three months prior to trial treatment</li></ul> |

---



**Table 3.** Timing of individual assessments in the Gut Bugs Trial.

|                           |                                                            | Baseline | 6 weeks | 12 weeks | 26 weeks |
|---------------------------|------------------------------------------------------------|----------|---------|----------|----------|
| <b>Clinic</b>             | Medical history and exam                                   | ✓        | ✓       | ✓        | ✓        |
|                           | Anthropometry                                              | ✓        | ✓       | ✓        | ✓        |
|                           | DXA                                                        | ✓        | ✓       | ✓        | ✓        |
|                           | Clinic blood pressure                                      | ✓        | ✓       | ✓        | ✓        |
|                           | 24-h ambulatory blood pressure monitoring                  | ✓        | ✓       | -        | -        |
| <b>Questionnaires</b>     | 3-day dietary record                                       | -        | ✓       | -        | -        |
|                           | NZAFFQ                                                     | ✓        | ✓       | ✓        | ✓        |
|                           | Birmingham IBS                                             | ✓        | ✓       | ✓        | ✓        |
|                           | Bowel movement questionnaire                               | ✓        | ✓       | ✓        | ✓        |
|                           | PedsQL                                                     | ✓        | ✓       | ✓        | ✓        |
|                           | EPOCH                                                      | ✓        | ✓       | ✓        | ✓        |
|                           | IPAQ                                                       | ✓        | ✓       | ✓        | ✓        |
|                           | ASAQ                                                       | ✓        | ✓       | ✓        | ✓        |
| <b>Laboratory</b>         | Matsuda Index                                              | ✓        | ✓       | ✓        | ✓        |
|                           | HOMA-IR                                                    | ✓        | ✓       | ✓        | ✓        |
|                           | HbA1c                                                      | ✓        | ✓       | ✓        | ✓        |
|                           | Fasting lipid profile                                      | ✓        | ✓       | ✓        | ✓        |
|                           | Liver function tests                                       | ✓        | ✓       | ✓        | ✓        |
|                           | hsCRP and uric acid                                        | ✓        | ✓       | ✓        | ✓        |
| <b>Stool bacteriology</b> | Gut microbial composition via 16S rRNA amplicon sequencing | ✓        | ✓       | ✓        | ✓        |
|                           | Metagenome                                                 | ✓        | ✓       | -        | -        |

ASAQ, Adolescent Sedentary Activity Questionnaire; DXA, Dual-energy x-ray absorptiometry; EPOCH, Engagement Perseverance Optimism Connectedness Happiness; HbA1c, glycated haemoglobin; HOMA-IR, homeostasis model assessment of insulin resistance; hsCRP, high-sensitivity C-Reactive Protein; IBS, irritable bowel syndrome; IPAQ, International Physical Activity Questionnaire; NZAFFQ, New Zealand Adolescent food frequency questionnaire; PedsQL, Pediatric Quality of Life Inventory.

1  
2  
3  
4  
5  
6  
7  
8  
9  
10  
11  
12  
13  
14  
15  
16  
17  
18  
19  
20  
21  
22  
23  
24  
25  
26  
27  
28  
29  
30  
31  
32  
33  
34  
35  
36  
37  
38  
39  
40  
41  
42  
43  
44  
45  
46  
47  
48  
49  
50  
51  
52  
53  
54  
55  
56  
57  
58  
59  
60

**Figure 1.** Diagram showing flow of participants (recipients) in the Gut Bugs Trial.

For peer review only



Diagram showing flow of participants (recipients) in the Gut Bugs Trial.

109x99mm (600 x 600 DPI)

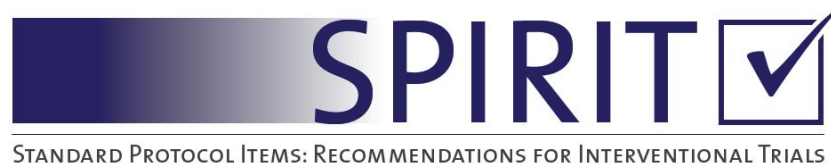

STANDARD PROTOCOL ITEMS: RECOMMENDATIONS FOR INTERVENTIONAL TRIALS

SPIRIT 2013 Checklist: Recommended items to address in a clinical trial protocol and related documents\*

| Section/item                      | Item No | Description                                                                                                                                                                                                                                                                              | Addressed on page number                  |
|-----------------------------------|---------|------------------------------------------------------------------------------------------------------------------------------------------------------------------------------------------------------------------------------------------------------------------------------------------|-------------------------------------------|
| <b>Administrative information</b> |         |                                                                                                                                                                                                                                                                                          |                                           |
| Title                             | 1       | Descriptive title identifying the study design, population, interventions, and, if applicable, trial acronym                                                                                                                                                                             | 1                                         |
| Trial registration                | 2a      | Trial identifier and registry name. If not yet registered, name of intended registry                                                                                                                                                                                                     | 2 & 17                                    |
|                                   | 2b      | All items from the World Health Organization Trial Registration Data Set                                                                                                                                                                                                                 | 17                                        |
| Protocol version                  | 3       | Date and version identifier                                                                                                                                                                                                                                                              | To be provided at the time of publication |
| Funding                           | 4       | Sources and types of financial, material, and other support                                                                                                                                                                                                                              | 17                                        |
| Roles and responsibilities        | 5a      | Names, affiliations, and roles of protocol contributors                                                                                                                                                                                                                                  | 1 & 17                                    |
|                                   | 5b      | Name and contact information for the trial sponsor                                                                                                                                                                                                                                       | 17                                        |
|                                   | 5c      | Role of study sponsor and funders, if any, in study design; collection, management, analysis, and interpretation of data; writing of the report; and the decision to submit the report for publication, including whether they will have ultimate authority over any of these activities | 1                                         |
|                                   | 5d      | Composition, roles, and responsibilities of the coordinating centre, steering committee, endpoint adjudication committee, data management team, and other individuals or groups overseeing the trial, if applicable (see Item 21a for data monitoring committee)                         | 13                                        |

**Introduction**

|    |                                                           |     |                                                                                                                                                                                                                                                                                                                                                                                |                   |
|----|-----------------------------------------------------------|-----|--------------------------------------------------------------------------------------------------------------------------------------------------------------------------------------------------------------------------------------------------------------------------------------------------------------------------------------------------------------------------------|-------------------|
| 1  | Background and rationale                                  | 6a  | Description of research question and justification for undertaking the trial, including summary of relevant studies (published and unpublished) examining benefits and harms for each intervention                                                                                                                                                                             | 3 to 5            |
| 2  |                                                           |     |                                                                                                                                                                                                                                                                                                                                                                                |                   |
| 3  |                                                           |     |                                                                                                                                                                                                                                                                                                                                                                                |                   |
| 4  |                                                           | 6b  | Explanation for choice of comparators                                                                                                                                                                                                                                                                                                                                          | 8                 |
| 5  |                                                           |     |                                                                                                                                                                                                                                                                                                                                                                                |                   |
| 6  | Objectives                                                | 7   | Specific objectives or hypotheses                                                                                                                                                                                                                                                                                                                                              | 5                 |
| 7  |                                                           |     |                                                                                                                                                                                                                                                                                                                                                                                |                   |
| 8  | Trial design                                              | 8   | Description of trial design including type of trial (eg, parallel group, crossover, factorial, single group), allocation ratio, and framework (eg, superiority, equivalence, noninferiority, exploratory)                                                                                                                                                                      | 5                 |
| 9  |                                                           |     |                                                                                                                                                                                                                                                                                                                                                                                |                   |
| 10 |                                                           |     |                                                                                                                                                                                                                                                                                                                                                                                |                   |
| 11 |                                                           |     |                                                                                                                                                                                                                                                                                                                                                                                |                   |
| 12 | <b>Methods: Participants, interventions, and outcomes</b> |     |                                                                                                                                                                                                                                                                                                                                                                                |                   |
| 13 |                                                           |     |                                                                                                                                                                                                                                                                                                                                                                                |                   |
| 14 | Study setting                                             | 9   | Description of study settings (eg, community clinic, academic hospital) and list of countries where data will be collected. Reference to where list of study sites can be obtained                                                                                                                                                                                             | 9                 |
| 15 |                                                           |     |                                                                                                                                                                                                                                                                                                                                                                                |                   |
| 16 |                                                           |     |                                                                                                                                                                                                                                                                                                                                                                                |                   |
| 17 | Eligibility criteria                                      | 10  | Inclusion and exclusion criteria for participants. If applicable, eligibility criteria for study centres and individuals who will perform the interventions (eg, surgeons, psychotherapists)                                                                                                                                                                                   | 2, 5 & 6, 22 & 23 |
| 18 |                                                           |     |                                                                                                                                                                                                                                                                                                                                                                                |                   |
| 19 |                                                           |     |                                                                                                                                                                                                                                                                                                                                                                                |                   |
| 20 | Interventions                                             | 11a | Interventions for each group with sufficient detail to allow replication, including how and when they will be administered                                                                                                                                                                                                                                                     | 8                 |
| 21 |                                                           |     |                                                                                                                                                                                                                                                                                                                                                                                |                   |
| 22 |                                                           |     |                                                                                                                                                                                                                                                                                                                                                                                |                   |
| 23 |                                                           | 11b | Criteria for discontinuing or modifying allocated interventions for a given trial participant (eg, drug dose change in response to harms, participant request, or improving/worsening disease)                                                                                                                                                                                 | N/A               |
| 24 |                                                           |     |                                                                                                                                                                                                                                                                                                                                                                                |                   |
| 25 |                                                           |     |                                                                                                                                                                                                                                                                                                                                                                                |                   |
| 26 |                                                           | 11c | Strategies to improve adherence to intervention protocols, and any procedures for monitoring adherence (eg, drug tablet return, laboratory tests)                                                                                                                                                                                                                              | N/A               |
| 27 |                                                           |     |                                                                                                                                                                                                                                                                                                                                                                                |                   |
| 28 |                                                           |     |                                                                                                                                                                                                                                                                                                                                                                                |                   |
| 29 |                                                           |     |                                                                                                                                                                                                                                                                                                                                                                                |                   |
| 30 |                                                           | 11d | Relevant concomitant care and interventions that are permitted or prohibited during the trial                                                                                                                                                                                                                                                                                  | 8                 |
| 31 |                                                           |     |                                                                                                                                                                                                                                                                                                                                                                                |                   |
| 32 | Outcomes                                                  | 12  | Primary, secondary, and other outcomes, including the specific measurement variable (eg, systolic blood pressure), analysis metric (eg, change from baseline, final value, time to event), method of aggregation (eg, median, proportion), and time point for each outcome. Explanation of the clinical relevance of chosen efficacy and harm outcomes is strongly recommended | 14 & 15           |
| 33 |                                                           |     |                                                                                                                                                                                                                                                                                                                                                                                |                   |
| 34 |                                                           |     |                                                                                                                                                                                                                                                                                                                                                                                |                   |
| 35 |                                                           |     |                                                                                                                                                                                                                                                                                                                                                                                |                   |
| 36 |                                                           |     |                                                                                                                                                                                                                                                                                                                                                                                |                   |
| 37 | Participant timeline                                      | 13  | Time schedule of enrolment, interventions (including any run-ins and washouts), assessments, and visits for participants. A schematic diagram is highly recommended (see Figure)                                                                                                                                                                                               | 24                |
| 38 |                                                           |     |                                                                                                                                                                                                                                                                                                                                                                                |                   |
| 39 |                                                           |     |                                                                                                                                                                                                                                                                                                                                                                                |                   |
| 40 |                                                           |     |                                                                                                                                                                                                                                                                                                                                                                                |                   |
| 41 |                                                           |     |                                                                                                                                                                                                                                                                                                                                                                                |                   |
| 42 |                                                           |     |                                                                                                                                                                                                                                                                                                                                                                                |                   |
| 43 |                                                           |     |                                                                                                                                                                                                                                                                                                                                                                                |                   |
| 44 |                                                           |     |                                                                                                                                                                                                                                                                                                                                                                                |                   |
| 45 |                                                           |     |                                                                                                                                                                                                                                                                                                                                                                                |                   |
| 46 |                                                           |     |                                                                                                                                                                                                                                                                                                                                                                                |                   |

|    |                                                                     |     |                                                                                                                                                                                                                                                                                                                                                                                                              |         |
|----|---------------------------------------------------------------------|-----|--------------------------------------------------------------------------------------------------------------------------------------------------------------------------------------------------------------------------------------------------------------------------------------------------------------------------------------------------------------------------------------------------------------|---------|
| 1  | Sample size                                                         | 14  | Estimated number of participants needed to achieve study objectives and how it was determined, including clinical and statistical assumptions supporting any sample size calculations                                                                                                                                                                                                                        | 14      |
| 2  |                                                                     |     |                                                                                                                                                                                                                                                                                                                                                                                                              |         |
| 3  |                                                                     |     |                                                                                                                                                                                                                                                                                                                                                                                                              |         |
| 4  | Recruitment                                                         | 15  | Strategies for achieving adequate participant enrolment to reach target sample size                                                                                                                                                                                                                                                                                                                          | 5 & 6   |
| 5  |                                                                     |     |                                                                                                                                                                                                                                                                                                                                                                                                              |         |
| 6  |                                                                     |     |                                                                                                                                                                                                                                                                                                                                                                                                              |         |
| 7  | <b>Methods: Assignment of interventions (for controlled trials)</b> |     |                                                                                                                                                                                                                                                                                                                                                                                                              |         |
| 8  | Allocation:                                                         |     |                                                                                                                                                                                                                                                                                                                                                                                                              |         |
| 9  |                                                                     |     |                                                                                                                                                                                                                                                                                                                                                                                                              |         |
| 10 | Sequence generation                                                 | 16a | Method of generating the allocation sequence (eg, computer-generated random numbers), and list of any factors for stratification. To reduce predictability of a random sequence, details of any planned restriction (eg, blocking) should be provided in a separate document that is unavailable to those who enrol participants or assign interventions                                                     | 7       |
| 11 |                                                                     |     |                                                                                                                                                                                                                                                                                                                                                                                                              |         |
| 12 |                                                                     |     |                                                                                                                                                                                                                                                                                                                                                                                                              |         |
| 13 |                                                                     |     |                                                                                                                                                                                                                                                                                                                                                                                                              |         |
| 14 |                                                                     |     |                                                                                                                                                                                                                                                                                                                                                                                                              |         |
| 15 |                                                                     |     |                                                                                                                                                                                                                                                                                                                                                                                                              |         |
| 16 | Allocation concealment mechanism                                    | 16b | Mechanism of implementing the allocation sequence (eg, central telephone; sequentially numbered, opaque, sealed envelopes), describing any steps to conceal the sequence until interventions are assigned                                                                                                                                                                                                    | 7       |
| 17 |                                                                     |     |                                                                                                                                                                                                                                                                                                                                                                                                              |         |
| 18 |                                                                     |     |                                                                                                                                                                                                                                                                                                                                                                                                              |         |
| 19 |                                                                     |     |                                                                                                                                                                                                                                                                                                                                                                                                              |         |
| 20 | Implementation                                                      | 16c | Who will generate the allocation sequence, who will enrol participants, and who will assign participants to interventions                                                                                                                                                                                                                                                                                    | 7 & 8   |
| 21 |                                                                     |     |                                                                                                                                                                                                                                                                                                                                                                                                              |         |
| 22 |                                                                     |     |                                                                                                                                                                                                                                                                                                                                                                                                              |         |
| 23 |                                                                     |     |                                                                                                                                                                                                                                                                                                                                                                                                              |         |
| 24 | Blinding (masking)                                                  | 17a | Who will be blinded after assignment to interventions (eg, trial participants, care providers, outcome assessors, data analysts), and how                                                                                                                                                                                                                                                                    | 7       |
| 25 |                                                                     |     |                                                                                                                                                                                                                                                                                                                                                                                                              |         |
| 26 |                                                                     |     |                                                                                                                                                                                                                                                                                                                                                                                                              |         |
| 27 |                                                                     | 17b | If blinded, circumstances under which unblinding is permissible, and procedure for revealing a participant's allocated intervention during the trial                                                                                                                                                                                                                                                         | 8       |
| 28 |                                                                     |     |                                                                                                                                                                                                                                                                                                                                                                                                              |         |
| 29 |                                                                     |     |                                                                                                                                                                                                                                                                                                                                                                                                              |         |
| 30 |                                                                     |     |                                                                                                                                                                                                                                                                                                                                                                                                              |         |
| 31 | <b>Methods: Data collection, management, and analysis</b>           |     |                                                                                                                                                                                                                                                                                                                                                                                                              |         |
| 32 |                                                                     |     |                                                                                                                                                                                                                                                                                                                                                                                                              |         |
| 33 | Data collection methods                                             | 18a | Plans for assessment and collection of outcome, baseline, and other trial data, including any related processes to promote data quality (eg, duplicate measurements, training of assessors) and a description of study instruments (eg, questionnaires, laboratory tests) along with their reliability and validity, if known. Reference to where data collection forms can be found, if not in the protocol | 9 to 13 |
| 34 |                                                                     |     |                                                                                                                                                                                                                                                                                                                                                                                                              |         |
| 35 |                                                                     |     |                                                                                                                                                                                                                                                                                                                                                                                                              |         |
| 36 |                                                                     |     |                                                                                                                                                                                                                                                                                                                                                                                                              |         |
| 37 |                                                                     |     |                                                                                                                                                                                                                                                                                                                                                                                                              |         |
| 38 |                                                                     |     |                                                                                                                                                                                                                                                                                                                                                                                                              |         |
| 39 |                                                                     | 18b | Plans to promote participant retention and complete follow-up, including list of any outcome data to be collected for participants who discontinue or deviate from intervention protocols                                                                                                                                                                                                                    | 9       |
| 40 |                                                                     |     |                                                                                                                                                                                                                                                                                                                                                                                                              |         |
| 41 |                                                                     |     |                                                                                                                                                                                                                                                                                                                                                                                                              |         |
| 42 |                                                                     |     |                                                                                                                                                                                                                                                                                                                                                                                                              |         |
| 43 |                                                                     |     |                                                                                                                                                                                                                                                                                                                                                                                                              |         |
| 44 |                                                                     |     |                                                                                                                                                                                                                                                                                                                                                                                                              |         |
| 45 |                                                                     |     |                                                                                                                                                                                                                                                                                                                                                                                                              |         |
| 46 |                                                                     |     |                                                                                                                                                                                                                                                                                                                                                                                                              |         |

|    |                                 |     |                                                                                                                                                                                                                                                                                                                                       |         |
|----|---------------------------------|-----|---------------------------------------------------------------------------------------------------------------------------------------------------------------------------------------------------------------------------------------------------------------------------------------------------------------------------------------|---------|
| 1  | Data management                 | 19  | Plans for data entry, coding, security, and storage, including any related processes to promote data quality (eg, double data entry; range checks for data values). Reference to where details of data management procedures can be found, if not in the protocol                                                                     | 14      |
| 2  |                                 |     |                                                                                                                                                                                                                                                                                                                                       |         |
| 3  |                                 |     |                                                                                                                                                                                                                                                                                                                                       |         |
| 4  |                                 |     |                                                                                                                                                                                                                                                                                                                                       |         |
| 5  | Statistical methods             | 20a | Statistical methods for analysing primary and secondary outcomes. Reference to where other details of the statistical analysis plan can be found, if not in the protocol                                                                                                                                                              | 14 & 15 |
| 6  |                                 |     |                                                                                                                                                                                                                                                                                                                                       |         |
| 7  |                                 |     |                                                                                                                                                                                                                                                                                                                                       |         |
| 8  |                                 | 20b | Methods for any additional analyses (eg, subgroup and adjusted analyses)                                                                                                                                                                                                                                                              | 15      |
| 9  |                                 |     |                                                                                                                                                                                                                                                                                                                                       |         |
| 10 |                                 | 20c | Definition of analysis population relating to protocol non-adherence (eg, as randomised analysis), and any statistical methods to handle missing data (eg, multiple imputation)                                                                                                                                                       | 15      |
| 11 |                                 |     |                                                                                                                                                                                                                                                                                                                                       |         |
| 12 |                                 |     |                                                                                                                                                                                                                                                                                                                                       |         |
| 13 |                                 |     |                                                                                                                                                                                                                                                                                                                                       |         |
| 14 | <b>Methods: Monitoring</b>      |     |                                                                                                                                                                                                                                                                                                                                       |         |
| 15 |                                 |     |                                                                                                                                                                                                                                                                                                                                       |         |
| 16 | Data monitoring                 | 21a | Composition of data monitoring committee (DMC); summary of its role and reporting structure; statement of whether it is independent from the sponsor and competing interests; and reference to where further details about its charter can be found, if not in the protocol. Alternatively, an explanation of why a DMC is not needed | 13      |
| 17 |                                 |     |                                                                                                                                                                                                                                                                                                                                       |         |
| 18 |                                 |     |                                                                                                                                                                                                                                                                                                                                       |         |
| 19 |                                 |     |                                                                                                                                                                                                                                                                                                                                       |         |
| 20 |                                 |     |                                                                                                                                                                                                                                                                                                                                       |         |
| 21 |                                 |     |                                                                                                                                                                                                                                                                                                                                       |         |
| 22 |                                 | 21b | Description of any interim analyses and stopping guidelines, including who will have access to these interim results and make the final decision to terminate the trial                                                                                                                                                               | N/A     |
| 23 |                                 |     |                                                                                                                                                                                                                                                                                                                                       |         |
| 24 |                                 |     |                                                                                                                                                                                                                                                                                                                                       |         |
| 25 | Harms                           | 22  | Plans for collecting, assessing, reporting, and managing solicited and spontaneously reported adverse events and other unintended effects of trial interventions or trial conduct                                                                                                                                                     | 13      |
| 26 |                                 |     |                                                                                                                                                                                                                                                                                                                                       |         |
| 27 |                                 |     |                                                                                                                                                                                                                                                                                                                                       |         |
| 28 | Auditing                        | 23  | Frequency and procedures for auditing trial conduct, if any, and whether the process will be independent from investigators and the sponsor                                                                                                                                                                                           | N/A     |
| 29 |                                 |     |                                                                                                                                                                                                                                                                                                                                       |         |
| 30 |                                 |     |                                                                                                                                                                                                                                                                                                                                       |         |
| 31 |                                 |     |                                                                                                                                                                                                                                                                                                                                       |         |
| 32 | <b>Ethics and dissemination</b> |     |                                                                                                                                                                                                                                                                                                                                       |         |
| 33 |                                 |     |                                                                                                                                                                                                                                                                                                                                       |         |
| 34 | Research ethics approval        | 24  | Plans for seeking research ethics committee/institutional review board (REC/IRB) approval                                                                                                                                                                                                                                             | 16      |
| 35 |                                 |     |                                                                                                                                                                                                                                                                                                                                       |         |
| 36 |                                 |     |                                                                                                                                                                                                                                                                                                                                       |         |
| 37 | Protocol amendments             | 25  | Plans for communicating important protocol modifications (eg, changes to eligibility criteria, outcomes, analyses) to relevant parties (eg, investigators, REC/IRBs, trial participants, trial registries, journals, regulators)                                                                                                      | 16      |
| 38 |                                 |     |                                                                                                                                                                                                                                                                                                                                       |         |
| 39 |                                 |     |                                                                                                                                                                                                                                                                                                                                       |         |
| 40 |                                 |     |                                                                                                                                                                                                                                                                                                                                       |         |
| 41 |                                 |     |                                                                                                                                                                                                                                                                                                                                       |         |
| 42 |                                 |     |                                                                                                                                                                                                                                                                                                                                       |         |

|    |                               |     |                                                                                                                                                                                                                                                                                     |         |
|----|-------------------------------|-----|-------------------------------------------------------------------------------------------------------------------------------------------------------------------------------------------------------------------------------------------------------------------------------------|---------|
| 1  | Consent or assent             | 26a | Who will obtain informed consent or assent from potential trial participants or authorised surrogates, and how (see Item 32)                                                                                                                                                        | 6       |
| 2  |                               |     |                                                                                                                                                                                                                                                                                     |         |
| 3  |                               |     |                                                                                                                                                                                                                                                                                     |         |
| 4  |                               | 26b | Additional consent provisions for collection and use of participant data and biological specimens in ancillary studies, if applicable                                                                                                                                               | N/A     |
| 5  |                               |     |                                                                                                                                                                                                                                                                                     |         |
| 6  |                               |     |                                                                                                                                                                                                                                                                                     |         |
| 7  | Confidentiality               | 27  | How personal information about potential and enrolled participants will be collected, shared, and maintained in order to protect confidentiality before, during, and after the trial                                                                                                | 6       |
| 8  |                               |     |                                                                                                                                                                                                                                                                                     |         |
| 9  |                               |     |                                                                                                                                                                                                                                                                                     |         |
| 10 | Declaration of interests      | 28  | Financial and other competing interests for principal investigators for the overall trial and each study site                                                                                                                                                                       | 1       |
| 11 |                               |     |                                                                                                                                                                                                                                                                                     |         |
| 12 |                               |     |                                                                                                                                                                                                                                                                                     |         |
| 13 | Access to data                | 29  | Statement of who will have access to the final trial dataset, and disclosure of contractual agreements that limit such access for investigators                                                                                                                                     | 14      |
| 14 |                               |     |                                                                                                                                                                                                                                                                                     |         |
| 15 |                               |     |                                                                                                                                                                                                                                                                                     |         |
| 16 | Ancillary and post-trial care | 30  | Provisions, if any, for ancillary and post-trial care, and for compensation to those who suffer harm from trial participation                                                                                                                                                       | 13      |
| 17 |                               |     |                                                                                                                                                                                                                                                                                     |         |
| 18 |                               |     |                                                                                                                                                                                                                                                                                     |         |
| 19 |                               |     |                                                                                                                                                                                                                                                                                     |         |
| 20 | Dissemination policy          | 31a | Plans for investigators and sponsor to communicate trial results to participants, healthcare professionals, the public, and other relevant groups (eg, via publication, reporting in results databases, or other data sharing arrangements), including any publication restrictions | 16 & 17 |
| 21 |                               |     |                                                                                                                                                                                                                                                                                     |         |
| 22 |                               |     |                                                                                                                                                                                                                                                                                     |         |
| 23 |                               |     |                                                                                                                                                                                                                                                                                     |         |
| 24 |                               | 31b | Authorship eligibility guidelines and any intended use of professional writers                                                                                                                                                                                                      | N/A     |
| 25 |                               |     |                                                                                                                                                                                                                                                                                     |         |
| 26 |                               | 31c | Plans, if any, for granting public access to the full protocol, participant-level dataset, and statistical code                                                                                                                                                                     | N/A     |
| 27 |                               |     |                                                                                                                                                                                                                                                                                     |         |
| 28 |                               |     |                                                                                                                                                                                                                                                                                     |         |
| 29 | <b>Appendices</b>             |     |                                                                                                                                                                                                                                                                                     |         |
| 30 |                               |     |                                                                                                                                                                                                                                                                                     |         |
| 31 | Informed consent materials    | 32  | Model consent form and other related documentation given to participants and authorised surrogates                                                                                                                                                                                  | N/A     |
| 32 |                               |     |                                                                                                                                                                                                                                                                                     |         |
| 33 |                               |     |                                                                                                                                                                                                                                                                                     |         |
| 34 | Biological specimens          | 33  | Plans for collection, laboratory evaluation, and storage of biological specimens for genetic or molecular analysis in the current trial and for future use in ancillary studies, if applicable                                                                                      | N/A     |
| 35 |                               |     |                                                                                                                                                                                                                                                                                     |         |
| 36 |                               |     |                                                                                                                                                                                                                                                                                     |         |

37 \*It is strongly recommended that this checklist be read in conjunction with the SPIRIT 2013 Explanation & Elaboration for important clarification on the items.  
 38 Amendments to the protocol should be tracked and dated. The SPIRIT checklist is copyrighted by the SPIRIT Group under the Creative Commons  
 39 "[Attribution-NonCommercial-NoDerivs 3.0 Unported](https://creativecommons.org/licenses/by-nc-nd/3.0/)" license.  
 40  
 41  
 42



# BMJ Open

## Protocol for the Gut Bugs Trial: a randomised double-blind placebo-controlled trial of gut microbiome transfer for the treatment of obesity in adolescents

|                                 |                                                                                                                                                                                                                                                                                                                                                                                                                                                                                                                                                                                                                                                                                                                                                                                                                                                                                                                                                                                                                                                                                         |
|---------------------------------|-----------------------------------------------------------------------------------------------------------------------------------------------------------------------------------------------------------------------------------------------------------------------------------------------------------------------------------------------------------------------------------------------------------------------------------------------------------------------------------------------------------------------------------------------------------------------------------------------------------------------------------------------------------------------------------------------------------------------------------------------------------------------------------------------------------------------------------------------------------------------------------------------------------------------------------------------------------------------------------------------------------------------------------------------------------------------------------------|
| Journal:                        | <i>BMJ Open</i>                                                                                                                                                                                                                                                                                                                                                                                                                                                                                                                                                                                                                                                                                                                                                                                                                                                                                                                                                                                                                                                                         |
| Manuscript ID                   | bmjopen-2018-026174.R2                                                                                                                                                                                                                                                                                                                                                                                                                                                                                                                                                                                                                                                                                                                                                                                                                                                                                                                                                                                                                                                                  |
| Article Type:                   | Protocol                                                                                                                                                                                                                                                                                                                                                                                                                                                                                                                                                                                                                                                                                                                                                                                                                                                                                                                                                                                                                                                                                |
| Date Submitted by the Author:   | 29-Jan-2019                                                                                                                                                                                                                                                                                                                                                                                                                                                                                                                                                                                                                                                                                                                                                                                                                                                                                                                                                                                                                                                                             |
| Complete List of Authors:       | Leong, Karen; University of Auckland, Liggins Institute<br>Jayasinghe, Thilini ; University of Auckland, Liggins Institute<br>Derraik, José; University of Auckland, Liggins Institute<br>Albert, Benjamin; University of Auckland, Liggins Institute<br>Chiavaroli , Valentina ; University of Auckland, Liggins Institute<br>Svirskis, Darren; School of Pharmacy, Faculty of Medical and Health Sciences, University of Auckland, Private Bag 92019, Auckland 1142, New Zealand<br>Beck, Kathryn; Massey University, School of Sport Exercise and Nutrition<br>Conlon, Cathryn; Massey University, School of Sport Exercise and Nutrition<br>Jiang, Yannan; The University of Auckland, Dept of Statistics<br>Schierding , William ; University of Auckland, Liggins Institute<br>Vatanen, Tommi; University of Auckland, Liggins Institute<br>Holland , David ; Counties Manukau District Health Board, Department of Infectious Diseases<br>O'Sullivan, Justin ; University of Auckland, Liggins Institute<br>Cutfield, Wayne; University of Auckland, Liggins Institute and NRCGD |
| <b>Primary Subject Heading</b>: | Diabetes and endocrinology                                                                                                                                                                                                                                                                                                                                                                                                                                                                                                                                                                                                                                                                                                                                                                                                                                                                                                                                                                                                                                                              |
| Secondary Subject Heading:      | Paediatrics, Gastroenterology and hepatology, Nutrition and metabolism, Public health                                                                                                                                                                                                                                                                                                                                                                                                                                                                                                                                                                                                                                                                                                                                                                                                                                                                                                                                                                                                   |
| Keywords:                       | Obesity, Paediatric endocrinology < DIABETES & ENDOCRINOLOGY, MICROBIOLOGY, Adolescents, Clinical trials < THERAPEUTICS                                                                                                                                                                                                                                                                                                                                                                                                                                                                                                                                                                                                                                                                                                                                                                                                                                                                                                                                                                 |
|                                 |                                                                                                                                                                                                                                                                                                                                                                                                                                                                                                                                                                                                                                                                                                                                                                                                                                                                                                                                                                                                                                                                                         |

SCHOLARONE™  
Manuscripts

# Protocol for the Gut Bugs Trial: a randomised double-blind placebo-controlled trial of gut microbiome transfer for the treatment of obesity in adolescents

Karen S W Leong<sup>1,2</sup>, Thilini N Jayasinghe<sup>1</sup>, José G B Derraik<sup>1,2,3</sup>, Benjamin B Albert<sup>1,2</sup>,  
Valentina Chiavaroli<sup>1</sup>, Darren M Svirskis<sup>4</sup>, Kathryn L Beck<sup>5</sup>, Cathryn A Conlon<sup>5</sup>, Yannan  
Jiang<sup>6</sup>, William Schierding<sup>1</sup>, Tommi Vatanen<sup>1,7</sup>, David J Holland<sup>8</sup>, Justin M O'Sullivan<sup>1,2†</sup>,  
Wayne S Cutfield<sup>1,2†</sup>

<sup>1</sup> Liggins Institute, University of Auckland, Auckland, New Zealand.

<sup>2</sup> A Better Start – National Science Challenge, University of Auckland, Auckland, New Zealand.

<sup>3</sup> Department of Women's and Children's Health, Uppsala University, Uppsala, Sweden.

<sup>4</sup> School of Pharmacy, Faculty of Medical and Health Sciences, University of Auckland, Auckland, New Zealand.

<sup>5</sup> School of Sport Exercise and Nutrition, College of Health, Massey University, Auckland, New Zealand.

<sup>6</sup> Department of Statistics, University of Auckland, Auckland, New Zealand.

<sup>7</sup> Broad Institute of MIT and Harvard, Cambridge, Massachusetts, USA.

<sup>8</sup> Department of Infectious Diseases, Counties Manukau District Health Board, Auckland, New Zealand.

†JM O'Sullivan and WS Cutfield contributed equally to the study.

Corresponding author: Professor Wayne Cutfield, Liggins Institute, University of Auckland, Private Bag 92019, Auckland, New Zealand; e-mail [w.cutfield@auckland.ac.nz](mailto:w.cutfield@auckland.ac.nz); ph +64.9.923.4476; fax +64.9.373.8763.

**Competing interests:** The authors have no financial conflicts of interest to disclose that may be relevant to this work. The funders had no role in study design, decision to publish, or preparation of this manuscript.

**Word count:** 5,525

## ABSTRACT

**Introduction:** Animal studies showed that germ-free mice inoculated with normal mouse gut bacteria developed obesity, insulin resistance, and higher triglyceride levels, despite similar food intake. In humans, an association has been found between obesity and gut microbiome dysbiosis. However, gut microbiome transfer has not been evaluated for the treatment of human obesity. We will examine the effectiveness of gut microbiome transfer using encapsulated material for the treatment of obesity in adolescents.

**Methods and analysis:** A two-arm, double-blind, placebo-controlled, randomised clinical trial of a single course of gut microbiome transfer will be conducted in 80 obese (BMI  $\geq 30$  kg/m<sup>2</sup>) adolescents (males and females, aged 14–18 years) in Auckland, New Zealand. Healthy lean donors (males and females, aged 18–28 years) will provide fresh stool samples from which bacteria will be isolated and double encapsulated. Participants (recipients) will be randomised at 1:1 to control (placebo) or treatment (gut microbiome transfer), stratified by sex. Recipients will receive 28 capsules over two consecutive mornings (~14 ml of frozen microbial suspension or saline). Clinical assessments will be performed at baseline, 6, 12, and 26 weeks, and will include: anthropometry, blood pressure, fasting metabolic markers, dietary intake, physical activity levels, and health-related quality of life. Insulin sensitivity (Matsuda index), gut microbiota population structure characterized by 16S rRNA amplicon sequencing, and body composition (DXA) will be assessed at baseline, 6, 12, and 26 weeks. 24-hour ambulatory blood pressure monitoring will be performed at baseline and at 6 weeks. The primary outcome is BMI standard deviation scores (SDS) at 6 weeks, with BMI SDS at 12 and 26 weeks as secondary outcomes. Other secondary outcomes include insulin sensitivity, adiposity (total body fat percentage), and gut microbial composition at 6, 12, and 26 weeks. Statistical analysis will be performed on the principle of intention to treat.

**Ethics and dissemination:** Ethics approval was provided by the Northern A Health and Disability Ethics Committee (HDEC) (Ministry of Health, New Zealand; 16/NTA/172). The trial results will be published in peer-reviewed journals and presented at international conferences.

**Trial registration number:** ACTRN12615001351505

### Strengths of this study

- This is the largest registered randomised clinical trial of gut microbiome transfer for obesity or insulin resistance in children or adults.
- The double-blind, placebo-controlled design, use of capsules as a non-invasive method of delivery, and characterisation of bacterial diversity and viability in donor stools are main strengths of this randomised clinical trial.
- Conducting a 6-month follow-up after a single treatment with gut microbiome will allow identification of a possible lag between treatment and change in BMI.
- This study is adequately powered to show a meaningful reduction in BMI SDS in the treated group.

### Limitations of this study

Our study will focus on obese adolescents, so that the findings may not be readily extrapolated to individuals with lesser degrees of adiposity or to older adults.

## INTRODUCTION

There is an increasing prevalence of obesity amongst children and adolescents<sup>1</sup>. Obesity tracks and amplifies through life<sup>2 3</sup>, and childhood obesity is associated with even greater severity of obesity and related co-morbidities in adulthood<sup>2 4</sup>. An elevated body mass index (BMI) in adolescence is associated with an increased all-cause mortality in adult life, and it is more predictive of later mortality than an elevated adult BMI<sup>5 6</sup>.

New paradigms on the causes of obesity incorporate a pivotal role for the gut microbiota (*i.e.* the microbial community present in the gastrointestinal tract). In recent years, assessments of the gut microbiome (all of the genes inside these gut microbiota cells) have identified reduced diversity of bacterial taxa as having an important effect on the development of obesity, insulin resistance, and diabetes mellitus<sup>7 8</sup>. The concept that the gut microbiome influences host metabolism and adiposity was introduced through gut microbiome transfer experiments in gnotobiotic (*i.e.* germ-free) mice<sup>9 10</sup>. These gnotobiotic mice have sterile colons and 40% less body fat than conventional mice, despite a food intake that is 29% higher<sup>9</sup>. When germ-free mice were inoculated with normal mouse gut bacteria, they developed obesity, insulin resistance, and increased triglycerides levels, while on the same food intake<sup>11</sup>. Further experiments showed that the gut microbiome modulates both sides of the energy balance equation by: (i) increasing energy yield from the diet stored as triglycerides; and (ii) altering energy expenditure via fatty acid oxidation<sup>10 12 13</sup>. These effects occur either directly within the bowel, or indirectly through the effects of bacterial products that enter the circulation. Current literature indicates that changes to the gut

1  
2  
3 microbiome and their respective products within the host circulation (*e.g.* lipopolysaccharides and short-  
4 chain fatty acids) can alter host responses, modulate insulin resistance, adiposity, and atherosclerosis and  
5 have an effect on the development of non-alcoholic fatty liver disease<sup>14 15</sup>.  
6  
7

8  
9 Gut microbiome transfer is now regularly used to treat recurrent or refractory *Clostridium difficile* colitis,  
10 which is associated with considerable morbidity and a reported 38% mortality<sup>16</sup>. Other treatment  
11 regimens for this disorder have relied on repeated courses of vancomycin, typically with low cure rates  
12 (~31%)<sup>17</sup>. By contrast, a single naso-duodenal infusion of a 'healthy' gut microbiome in elderly patients  
13 with chronic *C. difficile* colitis led to cure in 81% of subjects<sup>17</sup>. This<sup>17</sup> and other studies<sup>18-20</sup> have  
14 demonstrated that gut microbiome transfer is a viable treatment option for recurrent or refractory *C.*  
15 *difficile* colitis, without any noticeable side effects. Studies have confirmed that 6 weeks after gut  
16 microbiome transfer, the recipient's gut microbiome population structure resembles that of the donor<sup>21</sup>.  
17  
18  
19  
20  
21  
22

23 Gut microbiome transfer is a possible treatment for obesity and metabolic syndrome<sup>22</sup>. To date,  
24 investigation of the therapeutic benefit of gut microbiome transfer in adult metabolic disease (obesity and  
25 metabolic syndrome) has been limited<sup>20</sup>. Vrieze et al. performed a short-term gut microbiome transfer  
26 study in 9 treated and 9 control middle-aged adults with metabolic syndrome<sup>20</sup>. Six weeks after gut  
27 microbiome transfer via naso-duodenal tube, treated recipients had an impressive 75% improvement in  
28 insulin sensitivity. Kootte et al. reported similar results at 6 weeks among 38 obese males (median age  
29 56 years), but the improvements in both insulin sensitivity and gut microbiota composition reverted back  
30 to baseline at 18 weeks<sup>23</sup>. Conversely, our group (unpublished data) demonstrated that gut microbiome  
31 composition in recipients changed after gut microbiome transfer to mimic the lean donor's gut  
32 microbiome, and that this effect was sustained 26 weeks after treatment. This indirectly indicates that it  
33 is possible to change the gut microbiome, using a healthy donor, with possible concurrent health benefits.  
34  
35  
36  
37  
38  
39  
40  
41

42 Selection of donors is critical for successful gut microbiome transfer. The adverse effect of an  
43 inappropriate donor was illustrated by a patient with chronic *C. difficile* colitis, who developed new-onset  
44 obesity following gut microbiome transfer from a healthy but overweight donor<sup>24</sup>. Notably, a similar  
45 result was observed when the microbiome from an obese human was transferred into a lean mouse<sup>25</sup>.  
46  
47  
48  
49

50 Gut microbiome transfer is not considered a probiotic treatment<sup>26</sup>. Although gut microbiome transfer and  
51 probiotics involve the administration of live bacteria, this is where the similarities end. Probiotics are one  
52 of several defined live bacterial strains (*e.g.* *Bifidobacterium adolescentis*, *Lactobacillus acidophilus*, and  
53 *Lactobacillus casei*) that have been previously isolated and characterised<sup>26</sup>. The rationale for this  
54 treatment is that these supplemental bacteria and products have been shown to confer general health  
55 benefits. Conversely, gut microbiome transfer consists of transferring the entire microbiome from a  
56 healthy donor to a recipient, in order to establish a healthier microbial community and ameliorate the  
57  
58  
59  
60

undesirable underlying condition. Meta-analyses of randomised control studies of the effects of probiotics (e.g. *Lactobacillus* spp. and fermented milk-based probiotic treatments) on weight loss are conflicting<sup>27</sup><sup>28</sup>. There are currently no published studies of gut microbiome transfer for the treatment of human obesity. However, a study has shown that germ-free mice lose weight following gut microbiome transfer from mice who had gastric bypass surgery and exhibited rapid weight loss<sup>29</sup>. In addition, meta-analyses of the effectiveness of microbial transfers in the treatment of *C. difficile*<sup>30</sup> have demonstrated that gut microbiome transfer is efficacious and safe for inflammatory bowel disease (pooled cure rate 36%; 95% CI 17–60%)<sup>31</sup> and *C. difficile* (pooled cure rate 89%; 95% CI 84–93%)<sup>30</sup>. As such, gut microbiome transfer holds significant promise as a treatment for the rapid and concerted modification of an unhealthy gut microbiome, which we hypothesise will lead to weight loss in obese humans.

This clinical trial will assess whether gut microbiome transfer using encapsulated material is an effective treatment for obesity in adolescents.

## METHODS AND ANALYSIS

### Study design

A two-arm, double-blind, placebo-controlled, randomised clinical trial with obese adolescents randomly assigned to either treatment (encapsulated gut microbiome) or placebo (encapsulated saline solution), stratified by sex. Eligible participants will be followed for 26 weeks post randomisation (Figure 1). This trial protocol is reported as per the SPIRIT guidelines<sup>32</sup>.

### Recruitment and eligibility criteria

#### *Donors*

We will recruit 8 donors (4 males and 4 females), as recipients will only receive gut microbiome from donors of the same sex. This is to enhance microbial variability and standardise the treatment via gut microbiome transfer. Treatment with gut microbiome from donors of the same sex will be done as there may be potentially sex-specific differences in the effect of gut microbiome on weight and metabolism as described by Markle et al.<sup>33</sup>. Donors will be selected following strict inclusion criteria as described in Table 1, with exclusion criteria adapted from Youngster et al., Hirsch et al., van Nood et al., and Bakken et al.<sup>17-19</sup><sup>34</sup>. Eligible donors will be identified by word of mouth, the internal email system at the University of Auckland, and social media networks. Potential donors will be given a detailed information sheet about the study that includes a consent form.

1  
2  
3 To eliminate the risks of transmission of infectious diseases we will use screening procedures equivalent  
4 to those used for blood donation in New Zealand<sup>35</sup>, and also screen donors for potential faecal pathogens  
5 or multidrug-resistant organisms. As part of this regimen, all potential donors will undergo extensive  
6 testing for human pathogens, antigens, and antibodies (that indicate exposure to hepatitis A, B, or C  
7 viruses, and human immunodeficiency virus), syphilis, *C. difficile*, *Helicobacter pylori*, other bacterial  
8 and viral pathogens, multidrug-resistant organisms, as well as intestinal parasites. We will supplement  
9 these microbiological tests with characterisation of the gut microbiome through analysis of the  
10 metagenome and metatranscriptome<sup>36</sup>. In addition, we will conduct an interview to gather information  
11 about behaviours or activities that may exclude them from the trial (Table 1).  
12  
13  
14  
15  
16  
17

18  
19 Given evidence that irritable bowel syndrome (IBS) may be related to the gut microbiome, it is important  
20 to exclude potential donors who may have IBS. The Rome criteria are an accepted clinical tool to identify  
21 individuals with IBS, but they are relatively insensitive so that strict adherence to those criteria would  
22 potentially allow for individuals with mild IBS to donate<sup>37</sup>. Therefore, we will screen for IBS using a  
23 conservative modification of the Rome criteria, where we define a positive screen as having 3 or more  
24 episodes of abdominal pain per month as described in part I of the criteria, as well as an additional  
25 symptom as defined in part II<sup>38</sup>.  
26  
27  
28  
29  
30

31 Each donor is expected to produce a wet stool sample weighing 100-150 g. Our preliminary laboratory  
32 data indicate that an average stool sample from a donor will generate sufficient gut microbiome material  
33 for two same-sex recipients. Stool samples will be collected and immediately processed for encapsulation.  
34 Capsules from each sample will be individually coded, so that each recipient will receive an equal number  
35 of capsules (n=7) from each of the four same sex donors.  
36  
37  
38  
39

#### 40 *Participants (recipients)*

41  
42  
43 We will recruit 80 obese adolescents as per inclusion and exclusion criteria described in Table 2. Eligible  
44 recipients will be recruited via social media, word of mouth, and paediatric endocrinology clinics in  
45 Auckland. Potential recipients and caregivers will be given a detailed information sheet about the study  
46 that includes a consent form. Consent will be obtained from recipients if they are aged  $\geq 16$  years and  
47 from their parents if aged  $< 16$  years. Younger recipients will also be asked to sign an assent form. All  
48 consent and/or assent will be obtained by the researchers prior to the recipient's participation in the trial.  
49 All potential and enrolled recipients' personal information are recorded and kept in a secure folder and  
50 only accessible to the researchers, in order to protect their confidentiality.  
51  
52  
53  
54  
55  
56  
57

#### 58 **Specimen collection**

1  
2  
3 The donor gut microbiome will be double encapsulated and administered to recipients by the oral route,  
4 which delivers bacteria to the proximal bowel. Thus, we will not require the use of invasive techniques  
5 (*i.e.* naso-duodenal tube) for gut microbiome transfer. Instead, gut microbiome transfer will be performed  
6 as per recent studies<sup>18 19</sup>, which demonstrated that an encapsulated microbiome was a viable treatment  
7 option for recurrent or refractory *C. difficile* colitis, without noticeable side effects.  
8  
9

10  
11  
12 We have validated methods for gut microbiome isolation, preparation, and double encapsulation as  
13 detailed by Youngster et al.<sup>18</sup>. Briefly, immediately after donation, stools are placed in normal saline,  
14 blended, and sieved to remove particulate matter. Samples are then differentially centrifuged to isolate a  
15 bacterial pellet. The bacterial pellet is suspended in normal saline (containing 15% glycerol – a  
16 cryoprotectant) at 0.5 g wet weight/ml before being dispensed into size 0 DRcaps<sup>TM</sup> capsules (Capsugel  
17 Inc, Sydney, Australia). The size 0 capsules are closed and secondarily sealed in size 00 DRcaps<sup>TM</sup>  
18 capsules. These capsules mask taste, odour, and visual appearance, and are designed to remain intact  
19 during passage through the stomach, delivering their contents to the intestine<sup>39-41</sup>. Capsules are stored  
20 frozen at -80°C.  
21  
22

23  
24  
25 The use of low-speed centrifugation to pellet the bacterial cells is a feature of this methodology that  
26 reduces the risk of having free viruses<sup>42</sup> included into the treatment capsules. Storage (-80°C, <175 days<sup>18</sup>  
27  
28  
29  
30  
31  
32  
33  
34  
35  
36  
37  
38  
39  
40  
41  
42  
43  
44  
45  
46  
47  
48  
49  
50  
51  
52  
53  
54  
55  
56  
57  
58  
59  
60

### **Randomisation, allocation, and blinding**

Eligible participants will be randomised in a 1:1 ratio to either treatment or placebo group, stratified by sex, using block randomisation with variable block sizes of 2 and 4<sup>43</sup>. Randomisation sequences will be computer generated, and overseen by the biostatistician. Researchers and participants will be blinded to capsule contents, both of which (placebo and gut microbiome) look identical (white).

There are three steps in the blinding and allocation process. First, the independent research nurse allocates the recipient to group A or B using the randomisation sequence. Second, the placebo and treatment capsule packs each have a unique code (assigned by the technician who encapsulated them). Lastly, the independent research nurse allocates the pack according to the unique code associated with the randomisation sequence.

To maintain the integrity of the trial evaluation, statistical analyses will be performed at the completion of the study on encoded data (*i.e.* Group A vs Group B), so that the biostatistician will be blinded to treatment allocation. Recipients will be asked if they are able to identify the contents of capsules taken



1  
2  
3 (i.e. placebo or gut microbiome) at 6 weeks and 26 weeks. The effectiveness of treatment blinding will  
4 be assessed using the Bang's blinding index<sup>44</sup>. Blinding success will be determined by the thresholds of  
5 Moroz et al.<sup>45</sup>: unblinded ( $BBI \geq 0.2$ ); random guesses ( $-0.2 < BBI < 0.2$ ); or opposite guesses ( $BBI \leq$   
6  $-0.2$ ).  
7  
8

9  
10 Recipients will be unblinded in the case of any serious adverse events. These include on-going  
11 gastrointestinal bleeding, severe vomiting and/or diarrhoea, treatment related systemic infection,  
12 treatment related severe allergic reaction, coma, collapse and death. Unblinding will be done by an  
13 independent researcher who did not have any prior contact with the recipient, who will be able to  
14 determine the individual's treatment allocation.  
15  
16  
17  
18

### 19 20 **Study intervention**

21  
22  
23 All recipients will undergo bowel cleansing prior to treatment using an oral solution containing 70 g of  
24 Glycoprep-C<sup>®</sup> (active ingredient macrogol 3350) (Fresenius Kabi Australia Pty Ltd., Mount Kuring-gai,  
25 Australia). Bowel cleansing reduces gut microbial population by 31-fold and markedly reduces bacterial  
26 diversity<sup>46</sup>. This procedure was used in a pilot study of gut microbiome transfer in adults with type 2  
27 diabetes<sup>20</sup>. Diminishing the undesirable microbial community means that the donor bacteria are more  
28 likely to become established in the recipient's bowel<sup>20</sup>.  
29  
30  
31  
32

33  
34 Recipients will be advised to take the Glycoprep-C<sup>®</sup> solution between 4 pm and 6 pm the day before the  
35 treatment begins. It is expected that watery stools will follow for several hours to achieve bowel cleansing.  
36 Recipients will attend clinic early next morning, when each recipient in the placebo group will ingest  
37 saline capsules, while those in the treatment group will receive gut microbiome capsules. Each recipient  
38 will receive a total of 28 capsules (approximately 14 ml of frozen microbial suspension or saline)  
39 administered over two consecutive mornings under direct supervision from research staff<sup>18</sup>, specifically  
40 16 capsules in the first morning and 12 capsules in the second morning. Recipients will be fasting  
41 overnight for at least 8 hours prior to taking each set of capsules at clinic in the following morning.  
42 Capsules will be stored at  $-80^{\circ}\text{C}$ , and later transferred into a freezer at  $-30^{\circ}\text{C}$  in the morning of  
43 administration. Immediately before administration, treatment capsules will be placed onto gel packs at  
44  $4^{\circ}\text{C}$  to prevent harm to recipients upon swallowing. After treatment, all recipients will remain fasting for  
45 another 2 hours. Recipients will be advised not to change their diet, physical activity, and behaviour  
46 during the trial. All recipients will receive the same number of capsules from the four same-sex donors  
47 to standardized treatment and to ensure that overall donor microbiome diversity is increased and delivered  
48 in a reproducible fashion.  
49  
50  
51  
52  
53  
54  
55  
56  
57  
58  
59  
60

## Data collection and follow-up

### *Timing of assessments*

Recipients will be assessed four times over the course of the study: at baseline, 6 weeks, 12 weeks, and 26 weeks. Longitudinal follow-up over 26 weeks will establish the duration of the effect. The specific assessments that will be carried out at each time point are outlined in Table 3. Treatment (*i.e.* intake of capsules) will be administered within a week of the baseline assessment.

Clinical assessments will start between 07:00 am and 09:00 am at the Maurice & Agnes Paykel Clinical Research Unit (Liggins Institute, University of Auckland), after an overnight fast and no strenuous activity over the previous 24 hours.

All the recipients will be contacted and reminded of their follow-up visits via emails and text messages. Any recipient having difficulties to attend their assessment visit will be given the option to re-schedule it to a suitable time.

### *Insulin sensitivity and other blood tests*

Insulin sensitivity will be assessed in all recipients using the Matsuda index from a 75-g oral glucose tolerance test (OGTT)<sup>47</sup>. Blood samples will be collected at -10, 0, 30, 60, 90, and 120 minutes for glucose and insulin measurements. The Matsuda index is highly correlated with the hyperinsulinaemic euglycaemic clamp (the gold-standard assessment of insulin sensitivity<sup>48</sup>) and has excellent reproducibility during multiple measures<sup>49</sup>. Other markers of glycaemic control will also be measured, namely homeostasis model assessment of insulin resistance (HOMA-IR)<sup>50</sup> and glycated haemoglobin (HbA1c).

### *Other blood tests*

Fasting blood samples will be taken during the insulin sensitivity assessment to measure a number of other parameters. These will include markers of metabolic syndrome, such as uric acid, high-sensitivity C-reactive protein (hsCRP), and fasting lipids (*i.e.* total cholesterol, high-density lipoprotein cholesterol [HDL-C], low-density lipoprotein cholesterol [LDL-C], and triglycerides). Liver function will be assessed by measurement of gamma-glutamyl transferase (GGT), alkaline phosphatase (ALP), alanine aminotransferase (ALT), and aspartate transaminase (AST).

### *Anthropometry and body composition*

1  
2  
3  
4 Height will be measured to the nearest mm using a Harpenden stadiometer. Recipients will be asked to  
5 undo any hairstyle that might interfere with the measurements; they will stand with their feet together,  
6 with their back straight, and their heels in the same upright plane as the back of the head. Gentle upward  
7 traction on the mastoid process will be applied to straighten out the spine. Weight will be measured on a  
8 weighing scale (WM206, Wedderburn, Auckland, New Zealand) to the nearest 10 g. For weight  
9 measurements, the scale will be placed on a solid level floor, with recipients stepping on it with both feet  
10 at its centre. Both height and weight will be measured three times and the median value used for analysis;  
11 recipients will also be asked to remove shoes and bulky clothing, and to empty their pockets of any  
12 objects. Both the scale and stadiometer at our clinical research unit are checked on a weekly basis using  
13 the appropriate standards.  
14  
15  
16  
17  
18  
19  
20  
21

22 BMI will be calculated and transformed into standard deviations scores (SDS) adjusted for age and sex,  
23 based on WHO standards<sup>51</sup>. Waist and hip circumferences will be measured as per guidelines from the  
24 World Health Organization<sup>52</sup>. Both the waist and hip circumference measurements will be performed  
25 three times and the median value used for analysis. Both measurements will be made to the nearest mm  
26 with a standard measuring tape parallel to the floor, which is placed snugly around the recipient but  
27 without compressing the skin<sup>53</sup>. Body composition will be assessed using whole-body dual-energy X-ray  
28 absorptiometry (DXA, Lunar Prodigy™ and Lunar iDXA™, GE Medical Systems, Chicago, Illinois,  
29 USA). Recipients will have all longitudinal body composition data collected on the same device.  
30  
31  
32  
33  
34  
35

### 36 *Blood pressure*

37  
38

39 Clinic resting systolic and diastolic blood pressures will be measured at all assessments using the same  
40 oscillometric digital blood pressure monitor (ri-champion® N; Riester, Jungingen, Germany) with an  
41 appropriately-sized cuff on the extended non-dominant arm. All measurements will be recorded on each  
42 recipient while seated and after a 5-minute rest. Blood pressure will be measured three times, and the  
43 median value used for analysis.  
44  
45  
46  
47  
48

49 In addition, 24-hour ambulatory blood pressure monitoring will be performed at baseline and at 6 weeks,  
50 using an oscillometric device (Spacelabs 90217; Spacelabs Medical Inc, Redmond, Washington, USA)  
51 on the non-dominant arm. Over a 24-hour period, blood pressure will be measured every 20 minutes when  
52 the recipients are expected to be awake, and every 30 minutes when they are likely to be asleep (based  
53 on self-reported information). Recipients will be asked to record the time they go to bed and the time they  
54 wake up over the period of monitoring, so that waking and sleeping times can be more accurately  
55 identified.  
56  
57  
58  
59  
60

### *Dietary intake*

A dietary record describing all foods and fluids consumed over three days will be collected at the 6-week assessment. Recipients will be asked to describe all foods and fluids consumed in detail including brand names, types of foods (e.g. low fat), and cooking methods. Quantities will be described using standard household measures, as well as the information from food labels (where appropriate). Recipients will be provided with standardized instructions for completing the dietary record by a trained investigator, who will also review individual records with recipients to clarify errors, omissions, questionable entries, or unclear descriptions. These dietary records will be entered into FoodWorks software (v9.0, Xyris Software, Brisbane, Australia) by a trained investigator.

The New Zealand Adolescent Food Frequency Questionnaire (NZAFFQ)<sup>54</sup> will be administered at baseline and weeks 6, 12, and 26. The NZAFFQ was developed for and validated in New Zealand adolescents aged 14 to 18 years<sup>54</sup>.

### *Physical activity levels*

These will be measured using two questionnaires:

- International Physical Activity Questionnaire (IPAQ)<sup>55</sup> – it covers four domains of physical activity, namely work-related, transportation, housework/gardening, and leisure time.
- Adolescent Sedentary Activity Questionnaire (ASAQ)<sup>56</sup> – it covers a number of sedentary activities across five categories (small screen recreation, education, travel, cultural activities, and social activities).

### *Health-related quality of life*

This will be assessed using:

- EPOCH Measure of Adolescent Well-Being<sup>57</sup> – it provides an assessment of five positive psychological characteristics (engagement, perseverance, optimism, connectedness, and happiness).
- Pediatric Quality of Life Inventory (PedsQL)<sup>58</sup> – we will adopt only the teen and young adult self-reports (*i.e.* not the parent-proxy), which assess problems over the preceding month relating to physical, emotional, social, and school functioning.

1  
2  
3 In addition, we will assess symptoms of irritable bowel syndrome<sup>59</sup> and bowel movements using the  
4 Birmingham IBS symptom questionnaire and bowel movements questionnaire respectively. The  
5 Birmingham IBS symptom questionnaire is a self-administered 11-item symptom questionnaire that is  
6 scored using the Rome II criteria<sup>59</sup>. The bowel movement questionnaire was designed for this trial to  
7 assess and monitor changes pre and post treatment.  
8  
9

### 10 11 12 *Gut microbial composition* 13

14  
15 Sample collection will be performed at baseline prior to treatment and at 6 weeks, 12 weeks and 26 weeks  
16 post-treatment. Briefly, the participant will be given the bedpan liner (Onelink). They will be asked to: i)  
17 pass urine into the toilet prior to placing the tray on the toilet seat; ii) pass the stools; iii) cover the tray  
18 and leave it in the bathroom for immediate collection by a research team member. Using a small spatula,  
19 samples will be collected from three different areas of the stool (proximal, middle, and distal) and inserted  
20 into specimen containers (Onelink). The specimen containers will be immediately placed on ice and taken  
21 to the laboratory where they will be frozen and stored at -80°C. DNA and RNA extraction will be  
22 completed within 5 days of donation. Time to processing will be recorded.  
23  
24  
25  
26  
27  
28

29  
30 Note that we will advise participants to try not to have a bowel movement in the morning prior to their  
31 visit, having it in the clinic instead. For those participants who are unable to produce a stool sample during  
32 their visit, they will be provided with a stool collection kit to take home and detailed instructions on how  
33 to collect the stool sample. This kit is made up of: i) instructions on how to use the stool collection kit;  
34 ii) specimen container; and iii) bedpan liner. Once the stool has been collected in the home environment,  
35 the specimen container it should be immediately placed into their home freezer, and kept there until it is  
36 delivered to the research team.  
37  
38  
39  
40  
41

42  
43 All extractions will be performed using Qiagen-AllPrep DNA/RNA mini kit®, due to variation in  
44 extraction efficiencies with the different kits<sup>60</sup>. However, once the DNA or RNA is extracted and  
45 archived, we will have a relatively stable record of the composition and activity of the flora.  
46  
47

48  
49 Frozen faeces (~200 mg; weights will be recorded) will be subsampled from original faecal samples. All  
50 DNA and RNA isolations will be performed in a disinfected class II hood at room temperature. Briefly,  
51 stool samples will be incubated (10 min, room temperature) with vortexing (30 sec every 2 minutes) and  
52 treated with RLT Plus buffer (1.2mL; Qiagen) and 12µL beta-mercaptoethanol (Sigma-Aldrich). Acid-  
53 washed glass beads [1 ml; ≤106 µm (-140 U.S. sieve) (Sigma-Aldrich)] will be added to each sample and  
54 vortexed (10 min) on a TissueLyzer II (Qiagen). The supernatant will be removed and added to a  
55 QIAshredder spin column (Qiagen) and centrifuged (9000 rpm, 2 min, room temperature). The eluent  
56 will be added to an AllPrep DNA (Qiagen) spin column and centrifuged (30 sec, 14000 rpm, room  
57  
58  
59  
60

1  
2  
3 temperature). The eluent and AllPrep DNA spin columns will be used for RNA and DNA extraction,  
4 respectively, according to the manufacturer's instructions. Finally, DNA and RNA will be eluted with  
5 EB buffer and RNase-free water, respectively, and aliquots stored at -80°C for downstream mixed omics  
6 analysis.  
7  
8

9  
10 A series of blank samples (sterile saline) will be extracted in parallel to sample extractions to enable  
11 contamination testing. We will also extract ZymoBIOMICS™ Microbial Community Standard I (Even,  
12 Cellular Mix; Catalog #D6300) to determine potential bias in the extraction process.  
13  
14

15  
16 For 16S amplicon sequencing, library preparation will be performed using an Illumina platform by a  
17 commercial provider (to be determined) using standard protocols for the SV3-4 region. Shotgun  
18 metagenomics sequencing will be performed by a commercial provider (to be determined).  
19  
20  
21

22  
23 All raw sequencing files will be cleaned to remove adaptors and primer sequences, and trimmed for  
24 sequence quality (Phred score<30).  
25  
26

27  
28 Longitudinal analysis of gut microbiome data (i.e. change in alpha and beta diversity from baseline to 26  
29 weeks in treatment and placebo group) will be performed on Qiime2 (version 2018.4 or later) using  
30 default parameters<sup>61</sup>. PERMANOVA and Multivariate Association with Linear Models using MaAsLin  
31 (version 0.0.4; or later)<sup>62</sup> will be used to identify any significant differences in gut microbial communities  
32 and structure between treatment groups.  
33  
34  
35

36  
37 Metagenomic sequencing data will be analysed using default parameters of the HMP Unified Metabolic  
38 Analysis NETwrok (HuMAN2) (version 2; or later)<sup>63</sup> after removal of short reads (minimum length 50  
39 bases, trimmomatic version 0.33 or later<sup>64</sup>) and human sequences using BMTagger<sup>65</sup>. MaAsLin (version  
40 0.0.4; or later)<sup>62</sup> will be used to identify significant associations between microbial compositions,  
41 metabolomics data, and microbial functions.  
42  
43  
44  
45

## 46 47 **Safety monitoring**

48  
49

50 An independent safety monitoring committee has been established. All recipients are advised to remain  
51 under supervision in the clinical research unit for one hour after initial treatment and we will adopt robust  
52 exclusion and screening criteria for donors (as previously described). In addition, recipients' data will be  
53 monitored by the research team and the safety committee throughout the study for any adverse events, in  
54 particular gastrointestinal symptoms and possible allergies. All potential adverse events will be recorded.  
55 If any recipient suffers harm as a result of trial participation, they will be eligible to apply for  
56  
57  
58  
59  
60

1  
2  
3 compensation from the Accident Compensation Cooperation (ACC), which is a compulsory insurance  
4 cover for personal injury for everyone in New Zealand.  
5  
6

7  
8 If any concerns are identified during screening or clinical assessment of donors or recipients, further  
9 clinical evaluation and/or investigation will be immediately undertaken. If concerns are identified during  
10 the study, the recipient will be withdrawn if this is thought to be in their best interest.  
11  
12

### 13 14 **Outcome measures**

#### 15 16 17 *Primary outcome*

- 18  
19  
20 • BMI SDS at 6 weeks.  
21  
22

#### 23 24 *Secondary outcomes*

- 25 • BMI SDS at 12, and 26 weeks
- 26 • total body fat percentage (from DXA) at 6, 12, and 26 weeks
- 27 • insulin sensitivity at 6, 12, and 26 weeks
- 28 • gut microbial composition at 6, 12, and 26 weeks
- 29 • liver function at 6, 12, and 26 weeks
- 30 • lipid profile at 6, 12, and 26 weeks
- 31 • inflammatory markers [uric acid, high-sensitivity C-reactive protein (hsCRP)] at 6, 12, and 26 weeks
- 32 • blood pressure at 6, 12, and 26 weeks
- 33 • health-related quality of life at 6, 12, and 26 weeks
- 34 • IBS symptoms at 6, 12, and 26 weeks
- 35 • bowel movements at 6, 12, and 26 weeks
- 36  
37  
38  
39  
40  
41  
42  
43

### 44 **Sample size and power calculation**

45  
46  
47 Power calculation was based on data from a cohort of 50 obese adolescents in Australia aged 14–18 years,  
48 with a pooled mean BMI SDS of 2.5 and standard deviation of 0.27 at baseline<sup>66</sup>. A study with 32  
49 recipients per group will have 80% power at 5% significance level (two-sided) to detect a group difference  
50 of 0.19 in BMI SDS at 6 weeks after gut microbiome transfer, which is equivalent to a difference in  
51 weight of approximately 2 kg. To account for an approximate 20% loss to follow-up, we aim to recruit  
52 40 treatment and 40 control recipients.  
53  
54  
55  
56  
57

### 58 **Data management**

59  
60

1  
2  
3 All data collected will be entered and stored in password-protected web-based platforms. Rules for data  
4 validation will be in place to minimize human error, and all data entered by members of the research team  
5 will be double-checked by the database administrator to ensure accuracy of stored records. Only the  
6 researchers involved in the trial will have access to the final trial dataset.  
7  
8  
9

## 10 **Statistical analyses**

11  
12  
13  
14 Treatment evaluation will be performed on the principle of intention to treat, using data collected from  
15 all randomised recipients. Baseline demographics and clinical characteristics of recipients will be  
16 summarised by randomised group. The distribution of outcome measures will be first evaluated at  
17 scheduled visits using descriptive statistics. Generalised linear regression models will be used to assess  
18 the main treatment effects between groups, adjusting for the baseline outcome value<sup>67</sup> and sex  
19 (stratification factor). Model-adjusted estimates and the differences between the two groups will be  
20 calculated with 95% confidence intervals. Random effects mixed models will be used to evaluate the  
21 outcomes measured repeatedly over time, controlling for correlated data collected from the same  
22 recipient. Planned subgroup analysis by sex will be conducted on primary and secondary outcomes to  
23 evaluate the consistency of main treatment effects in males and females, by including an interaction term  
24 between sex and treatment group in the main model. If a significant interaction effect is found, separately  
25 subgroup analyses will be conducted to estimate the treatment effects in specific subgroups.  
26  
27  
28  
29  
30  
31  
32  
33

34  
35 Missing data on the primary outcome will be imputed using multiple imputations, which create multiple  
36 imputed datasets for the incomplete outcome variable that are analyzed using same regression models  
37 and combined for one inference. The Markov chain Monte Carlo (MCMC) method will be used to  
38 produce the parameter estimates, assuming the data are from a multivariate normal distribution and are  
39 missing at random. The SAS procedure, PROC MI, will be used which runs 200 iterations of the algorithm  
40 before selecting the first completed data set, and then allows 100 iterations between each successive data  
41 set. The default minimum number of imputations is 5, and we plan to run 30 to allow for both within and  
42 between imputation variances.  
43  
44  
45  
46  
47

48  
49 Per-protocol analyses will be carried out on those recipients without major protocol violations. A protocol  
50 deviation form will be used to record all major protocol deviations, and reviewed in a blinded fashion by  
51 the trial steering group prior to final data lock. The per-protocol population will be analysed using same  
52 regression models as the primary intention-to-treat (ITT) population to test the robustness of main trial  
53 findings.  
54  
55  
56

57  
58 Our secondary analyses will include the examination of potential effects of diet (e.g. fibre intake) and  
59 physical activity levels on study outcomes. Data analyses will be performed in SAS v.9.4 (SAS Institute,  
60



1  
2  
3 Cary, NC, USA), SPSS v25 (IBM Corp, Armonk, NY, USA), and/or Minitab v.16 (Pennsylvania State  
4 University, State College, PA, USA). All statistical tests will be two-sided at  $p < 0.05$ , with no adjustments  
5 for multiple comparisons. The CONSORT 2010 guidelines will be followed in reporting the main trial  
6 results.  
7  
8  
9

## 10 **Study status**

11  
12  
13  
14 The recruitment of recipients for the trial began in Oct 2017. It is expected that the study will be completed  
15 in mid-2019.  
16  
17

## 18 **Patient and public involvement**

19  
20  
21 Public input into the study design was provided in open meetings by the Northern A Health and Disability  
22 Ethics Committee, whose membership includes both clinical and lay persons, as well as Māori  
23 representatives (New Zealand indigenous people). Information on the trial was subsequently made  
24 available on social media platforms (e.g. Facebook), which allowed participants to read and contact the  
25 researchers if they wanted to participate. Participants were not involved in the development, recruitment  
26 of other participants, or conduct of the trial. All recipients will be asked about any possible adverse effects  
27 of treatment at specific time points throughout the trial; if any serious adverse effects are reported, a  
28 thorough follow-up will be conducted to investigate the incident. After completion of data analyses, all  
29 recipients will receive information about their individual results.  
30  
31  
32  
33  
34  
35  
36

## 37 **ETHICS AND DISSEMINATION**

38  
39  
40 Ethics approval for this study was granted in November 2016 by the Northern A Health and Disability  
41 Ethics Committee (Ministry of Health, New Zealand; 16/NTA/172). Involvement in this trial will be  
42 entirely voluntary. If a recipient agrees to take part, they will be free to withdraw from the study at any  
43 time. In addition, the participant will be withdrawn if the research team believes their ongoing  
44 involvement in the study is not in their best interest. Donors and recipients will be required to provide  
45 written informed consent prior to participation in the study. The Ethics Committee requires that a yearly  
46 progress report is submitted, which must disclose any protocol violations.  
47  
48  
49  
50  
51  
52

53  
54 Clinical and biochemical data will be entered into secure databases protected by passwords, with access  
55 restricted to investigators. Recipients and caregivers will be informed of incidental findings on  
56 unrecognized conditions (e.g. diabetes), with further medical follow-up arranged. Importantly, if at the  
57 end of the trial we find that gut microbiome transfer leads to a statistically significant improvement in  
58  
59  
60

1  
2  
3 key health outcomes, the treatment will be offered to all recipients who received placebo. Recipients and  
4 caregivers will also be provided with information on individual results.  
5  
6

7  
8 Communication to the scientific community will be through high-profile international research meetings,  
9 as well as relevant national and regional meetings. We aim to publish findings in high-impact peer-  
10 reviewed international journals. Further, the research team will communicate the findings to the general  
11 public in New Zealand and overseas through our institution's Communications Manager. Relevant  
12 findings will be shared with the community in a culturally appropriate manner.  
13  
14  
15

## 16 17 **REGISTRATION DETAILS**

18  
19  
20 This study is registered with the Australian New Zealand Clinical Trials Registry (ACTRN:  
21 ACTRN12615001351505). In addition, the Universal Trial Number (UTN), World Health Organization,  
22 has been obtained (U1111-1176-6753).  
23  
24  
25

26  
27 **Author contributions:** WSC, JMO, JGBD, KSWL, BBA, VC, DJH, DMS, TNJ, YJ, KLB, CAC, WS,  
28 and TV contributed to the conception and design of the study. KSWL, JGBD, WSC, JMO, TNJ, BBA,  
29 and VC drafted the protocol with input from all other authors.  
30  
31

32  
33 **Acknowledgements:** We thank Wendy Ranson, Yara Gerber, Janene Biggs, and for their valuable  
34 assistance during the development of this trial, and Khan Safayet Hossin for help with the database.  
35  
36

37  
38 **Funding:** This research received funding from the Rockfield Trust and A Better Start – National Science  
39 Challenge. VC was supported by a Long-Term Research Fellowship from the European Society for  
40 Paediatric Endocrinology (ESPE), TNJ received a University of Auckland Scholarship, and BBA is  
41 supported by a Maurice Paykel Research Fellowship.  
42  
43  
44

45  
46 **Competing interests:** None declared.  
47

## 48 49 **REFERENCES**

- 50  
51  
52 1. World Health Organization. Ending Childhood Obesity Report of The Commission on Ending  
53 Childhood Obesity. Geneva, 2016. [Available from: [http://www.who.int/end-childhood-](http://www.who.int/end-childhood-obesity/publications/echo-report/en/)  
54 [obesity/publications/echo-report/en/](http://www.who.int/end-childhood-obesity/publications/echo-report/en/)] accessed 29 January 2019.  
55  
56 2. The NS, Suchindran C, North KE, *et al*. Association of adolescent obesity with risk of severe obesity  
57 in adulthood. *JAMA* 2010;304:2042-7.  
58  
59  
60

3. Guo SS, Roche AF, Chumlea WC, *et al.* The predictive value of childhood body mass index values for overweight at age 35 y. *Am J Clin Nutr* 1994;59:810-9.
4. Halfon N, Larson K, Slusser W. Associations between obesity and comorbid mental health, developmental, and physical health conditions in a nationally representative sample of US children aged 10 to 17. *Acad Pediatr* 2013;13:6-13.
5. Engeland A, Bjorge T, Sogaard AJ, *et al.* Body mass index in adolescence in relation to total mortality: 32-year follow-up of 227,000 Norwegian boys and girls. *Am J Epidemiol* 2003;157:517-23.
6. Twig G, Yaniv G, Levine H, *et al.* Body-mass index in 2.3 million adolescents and cardiovascular death in adulthood. *N Engl J Med* 2016;374:2430-40.
7. Burcelin R, Serino M, Chabo C, *et al.* Metagenome and metabolism: the tissue microbiota hypothesis. *Diabetes Obes Metab* 2013;15:61-70.
8. Musso G, Gambino R, Cassader M. Obesity, diabetes, and gut microbiota: the hygiene hypothesis expanded? *Diabetes Care* 2010;33:2277-84.
9. Backhed F, Ding H, Wang T, *et al.* The gut microbiota as an environmental factor that regulates fat storage. *Proc Natl Acad Sci U S A* 2004;101:15718-23.
10. Turnbaugh PJ, Backhed F, Fulton L, *et al.* Diet-induced obesity is linked to marked but reversible alterations in the mouse distal gut microbiome. *Cell Host Microbe* 2008;3:213-23.
11. Backhed F, Manchester JK, Semenkovich CF, *et al.* Mechanisms underlying the resistance to diet-induced obesity in germ-free mice. *Proc Natl Acad Sci U S A* 2007;104:979-84.
12. Turnbaugh PJ, Ridaura VK, Faith JJ, *et al.* The effect of diet on the human gut microbiome: a metagenomic analysis in humanized gnotobiotic mice. *Sci Transl Med* 2009;1:6ra14.
13. Dumas ME, Barton RH, Toye A, *et al.* Metabolic profiling reveals a contribution of gut microbiota to fatty liver phenotype in insulin-resistant mice. *Proc Natl Acad Sci U S A* 2006;103:12511-6.
14. Ma J, Zhou Q, Li H. Gut microbiota and nonalcoholic fatty liver disease: Insights on mechanisms and therapy. *Nutrients* 2017;9:E1124.
15. Evans JM, Morris LS, Marchesi JR. The gut microbiome: the role of a virtual organ in the endocrinology of the host. *J Endocrinol* 2013;218:R37-47.
16. Hota SS, Achonu C, Crowcroft NS, *et al.* Determining mortality rates attributable to *Clostridium difficile* infection. *Emerg Infect Dis* 2012;18:305-7.
17. van Nood E, Vrieeze A, Nieuwdorp M, *et al.* Duodenal infusion of donor feces for recurrent *Clostridium difficile*. *N Engl J Med* 2013;368:407-15.
18. Youngster I, Russell GH, Pindar C, *et al.* Oral, capsulized, frozen fecal microbiota transplantation for relapsing *Clostridium difficile* infection. *JAMA* 2014;312:1772-8.
19. Hirsch BE, Saraiya N, Poeth K, *et al.* Effectiveness of fecal-derived microbiota transfer using orally administered capsules for recurrent *Clostridium difficile* infection. *BMC Infect Dis* 2015;15:191.
20. Vrieeze A, Van Nood E, Holleman F, *et al.* Transfer of intestinal microbiota from lean donors increases insulin sensitivity in individuals with metabolic syndrome. *Gastroenterology* 2012;143:913-6.e7.

- 1
- 2
- 3 21. Weingarden A, Gonzalez A, Vazquez-Baeza Y, *et al.* Dynamic changes in short- and long-term
- 4 bacterial composition following fecal microbiota transplantation for recurrent *Clostridium difficile*
- 5 infection. *Microbiome* 2015;3:10.
- 6
- 7 22. Walker AW, Parkhill J. Microbiology. Fighting obesity with bacteria. *Science* 2013;341:1069-70.
- 8
- 9 23. Kootte RS, Levin E, Salojarvi J, *et al.* Improvement of insulin sensitivity after lean donor feces in
- 10 metabolic syndrome is driven by baseline intestinal microbiota composition. *Cell Metab*
- 11 2017;26:611-19.e6.
- 12
- 13 24. Alang N, Kelly CR. Weight gain after fecal microbiota transplantation. *Open Forum Infect Dis*
- 14 2015;2:ofv004.
- 15
- 16 25. Ridaura VK, Faith JJ, Rey FE, *et al.* Gut microbiota from twins discordant for obesity modulate
- 17 metabolism in mice. *Science* 2013;341:1241214.
- 18
- 19 26. Hill C, Guarner F, Reid G, *et al.* Expert consensus document. The International Scientific Association
- 20 for Probiotics and Prebiotics consensus statement on the scope and appropriate use of the term
- 21 probiotic. *Nat Rev Gastroenterol Hepatol* 2014;11:506-14.
- 22
- 23 27. Park S, Bae JH. Probiotics for weight loss: a systematic review and meta-analysis. *Nutr Res*
- 24 2015;35:566-75.
- 25
- 26 28. Sun J, Buys N. Effects of probiotics consumption on lowering lipids and CVD risk factors: A
- 27 systematic review and meta-analysis of randomized controlled trials. *Ann Med* 2015;47:430-40.
- 28
- 29 29. Liou AP, Paziuk M, Luevano JM, Jr., *et al.* Conserved shifts in the gut microbiota due to gastric
- 30 bypass reduce host weight and adiposity. *Sci Transl Med* 2013;5:178ra41.
- 31
- 32 30. Kassam Z, Lee CH, Yuan Y, *et al.* Fecal microbiota transplantation for *Clostridium difficile* infection:
- 33 systematic review and meta-analysis. *Am J Gastroenterol* 2013;108:500-8.
- 34
- 35 31. Colman RJ, Rubin DT. Fecal microbiota transplantation as therapy for inflammatory bowel disease:
- 36 a systematic review and meta-analysis. *J Crohns Colitis* 2014;8:1569-81.
- 37
- 38 32. Chan AW, Tetzlaff JM, Altman DG, *et al.* SPIRIT 2013 statement: defining standard protocol items
- 39 for clinical trials. *Ann Intern Med* 2013;158:200-7.
- 40
- 41 33. Markle JG, Frank DN, Mortin-Toth S, *et al.* Sex differences in the gut microbiome drive hormone-
- 42 dependent regulation of autoimmunity. *Science* 2013;339:1084-88.
- 43
- 44 34. Bakken JS, Borody T, Brandt LJ, *et al.* Treating *Clostridium difficile* infection with fecal microbiota
- 45 transplantation. *Clin Gastroenterol Hepatol* 2011;9:1044-9.
- 46
- 47 35. New Zealand Blood Service. Detailed eligibility criteria. [Available from
- 48 <https://www.nzblood.co.nz/give-blood/donating/detailed-eligibility-criteria/>] accessed 29 January
- 49 2019.
- 50
- 51 36. Bibby K, Peccia J. Identification of viral pathogen diversity in sewage sludge by metagenome
- 52 analysis. *Environ Sci Technol* 2013;47:1945-51.
- 53
- 54 37. Lacy BE, Patel NK. Rome criteria and a diagnostic approach to irritable bowel syndrome. *J Clin Med*
- 55 2017;6:E99.
- 56
- 57
- 58
- 59
- 60

- 1  
2  
3 38. Vanner SJ, Depew WT, Paterson WG, *et al.* Predictive value of the Rome criteria for diagnosing the  
4 irritable bowel syndrome. *Am J Gastroenterol* 1999;94:2912-7.  
5  
6 39. Marzorati M, Possemiers S, Verhelst A, *et al.* A novel hypromellose capsule, with acid resistance  
7 properties, permits the targeted delivery of acid-sensitive products to the intestine. *LWT Food Sci*  
8 *Technol* 2015;60:544-51.  
9  
10 40. Miller DS, Parsons AM, Bresland J, *et al.* A simple and inexpensive enteric-coated capsule for  
11 delivery of acid-labile macromolecules to the small intestine. *J Zhejiang Univ-Sci B* 2015;16:586-  
12 92.  
13  
14 41. Amo R. DRcaps® capsules achieve delayed release properties for nutritional ingredients in human  
15 clinical study: Capsugel Inc, 2014. [Available from: [https://www.capsugel.com/knowledge-](https://www.capsugel.com/knowledge-center/drcaps-achieve-delayed-release-properties-for-nutritional-ingredients-in-hu)  
16 [center/drcaps-achieve-delayed-release-properties-for-nutritional-ingredients-in-hu](https://www.capsugel.com/knowledge-center/drcaps-achieve-delayed-release-properties-for-nutritional-ingredients-in-hu)] accessed 29  
17 January 2019.  
18  
19 42. Bourdin G, Schmitt B, Marvin Guy L, *et al.* Amplification and purification of T4-like *Escherichia*  
20 *coli* phages for phage therapy: from laboratory to pilot scale. *Appl Environ Microbiol* 2014;80:1469-  
21 76.  
22  
23 43. Sealed Envelope Ltd. Create a blocked randomisation list [Available from:  
24 <https://www.sealedenvelope.com/simple-randomiser/v1/lists>] accessed 3 Mar 2017.  
25  
26 44. Bang H, Ni L, Davis CE. Assessment of blinding in clinical trials. *Control Clin Trials* 2004;25:143-  
27 56.  
28  
29 45. Moroz A, Freed B, Tiedemann L, *et al.* Blinding measured: a systematic review of randomized  
30 controlled trials of acupuncture. *Evid Based Complement Alternat Med* 2013;2013:708251.  
31  
32 46. Jalanka J, Salonen A, Salojarvi J, *et al.* Effects of bowel cleansing on the intestinal microbiota. *Gut*  
33 2015;64:1562-8.  
34  
35 47. Matsuda M, DeFronzo RA. Insulin sensitivity indices obtained from oral glucose tolerance testing:  
36 comparison with the euglycemic insulin clamp. *Diabetes Care* 1999;22:1462-70.  
37  
38 48. Lorenzo C, Haffner SM, Stančáková A, *et al.* Relation of direct and surrogate measures of insulin  
39 resistance to cardiovascular risk factors in nondiabetic finnish offspring of type 2 diabetic  
40 individuals. *J Clin Endocrinol Metab* 2010;95:5082-90.  
41  
42 49. Maki KC, Rains TM, Dicklin MR, *et al.* Repeatability of indices of insulin sensitivity and secretion  
43 from standard liquid meal tests in subjects with type 2 diabetes mellitus or normal or impaired fasting  
44 glucose. *Diabetes Technol Ther* 2010;12:895-900.  
45  
46 50. Wallace TM, Levy JC, Matthews DR. Use and abuse of HOMA modeling. *Diabetes Care*  
47 2004;27:1487-95.  
48  
49 51. de Onis M, Onyango AW, Borghi E, *et al.* Development of a WHO growth reference for school-aged  
50 children and adolescents. *Bull World Health Organ* 2007;85:660-7.  
51  
52 52. World Health Organization. Waist circumference and waist-hip ratio: report of a WHO expert  
53 consultation, Geneva, 8–11 December 2008. [Available from:  
54  
55  
56  
57  
58  
59  
60

- 1  
2  
3 [http://www.who.int/nutrition/publications/obesity/WHO\\_report\\_waistcircumference\\_and\\_waisthip\\_ratio/en/](http://www.who.int/nutrition/publications/obesity/WHO_report_waistcircumference_and_waisthip_ratio/en/) accessed 29 January 2019.
- 4  
5  
6 53. National Center for Health Statistics. National Health and Nutrition Examination Survey III - Body  
7 Measurements (Anthropometry). Rockville, MD, USA: Centers for Disease Control and Prevention,  
8 1988. [Available from: <https://wwwn.cdc.gov/nchs/data/nhanes3/manuals/anthro.pdf>] accessed 29  
9 January 2019.
- 10  
11  
12 54. Wong JE, Parnell WR, Black KE, *et al.* Reliability and relative validity of a food frequency  
13 questionnaire to assess food group intakes in New Zealand adolescents. *Nutr J* 2012;11:65.
- 14  
15 55. Hagstromer M, Oja P, Sjostrom M. The International Physical Activity Questionnaire (IPAQ): a study  
16 of concurrent and construct validity. *Public Health Nutr* 2006;9:755-62.
- 17  
18 56. Hardy LL, Booth ML, Okely AD. The reliability of the Adolescent Sedentary Activity Questionnaire  
19 (ASAQ). *Prev Med* 2007;45:71-4.
- 20  
21 57. Kern ML, Benson L, Steinberg EA, *et al.* The EPOCH Measure of Adolescent Well-Being. *Psychol*  
22 *Assess* 2016;28:586-97.
- 23  
24 58. Varni JW, Seid M, Knight TS, *et al.* The PedsQL 4.0 Generic Core Scales: sensitivity, responsiveness,  
25 and impact on clinical decision-making. *J Behav Med* 2002;25:175-93.
- 26  
27 59. Roalfe AK, Roberts LM, Wilson S. Evaluation of the Birmingham IBS symptom questionnaire. *BMC*  
28 *Gastroenterol* 2008;8:30.
- 29  
30 60. Claassen S, du Toit E, Kaba M, *et al.* A comparison of the efficiency of five different commercial  
31 DNA extraction kits for extraction of DNA from faecal samples. *J Microbiol Methods* 2013;94:103-  
32 10.
- 33  
34 61. Caporaso JG, Kuczynski J, Stombaugh J, *et al.* QIIME allows analysis of high-throughput community  
35 sequencing data. *Nat Methods* 2010;7:335-6.
- 36  
37 62. Morgan XC, Tickle TL, Sokol H, *et al.* Dysfunction of the intestinal microbiome in inflammatory  
38 bowel disease and treatment. *Genome Biol* 2012;13:R79.
- 39  
40 63. Franzosa EA, McIver LJ, Rahnavard G, *et al.* Species-level functional profiling of metagenomes and  
41 metatranscriptomes. *Nat Methods* 2018;15:962-8.
- 42  
43 64. Bolger AM, Lohse M, Usadel B. Trimmomatic: a flexible trimmer for Illumina sequence data.  
44 *Bioinformatics* 2014;30:2114-20.
- 45  
46 65. Rotmistrovsky K, Agarwala R. BMTagger: Best Match Tagger for removing human reads from  
47 metagenomics datasets. Key: citeulike:9207261; 2011.
- 48  
49 66. O'Brien PE, Sawyer SM, Laurie C, *et al.* Laparoscopic adjustable gastric banding in severely obese  
50 adolescents: a randomized trial. *JAMA* 2010;303:519-26.
- 51  
52 67. Committee for Medicinal Products for Human Use. Guideline on adjustment for baseline covariates  
53 in clinical trials. Report EMA/CHMP/295050/2013. London: European Medicines Agency, 2015.  
54 [https://www.ema.europa.eu/documents/scientific-guideline/guideline-adjustment-baseline-  
55 covariates-clinical-trials\_en.pdf] accessed 29 January 2019.
- 56  
57  
58  
59  
60

**Table 1.** Inclusion and exclusion criteria for donors in the Gut Bugs Trial. Exclusion criteria adapted from Youngster et al., Hirsch et al., van Nood et al., and Bakken et al.<sup>17-19 34</sup>.

|                  |                                                                                                                                                                                                                                                                                                                                                                                                                                                                                                                                                                                                                                                                                                                                                                                                                                                                                                                                                                                                                                                                                                                                                                                                                                                                                                                                                                                                              |
|------------------|--------------------------------------------------------------------------------------------------------------------------------------------------------------------------------------------------------------------------------------------------------------------------------------------------------------------------------------------------------------------------------------------------------------------------------------------------------------------------------------------------------------------------------------------------------------------------------------------------------------------------------------------------------------------------------------------------------------------------------------------------------------------------------------------------------------------------------------------------------------------------------------------------------------------------------------------------------------------------------------------------------------------------------------------------------------------------------------------------------------------------------------------------------------------------------------------------------------------------------------------------------------------------------------------------------------------------------------------------------------------------------------------------------------|
| <b>Inclusion</b> | <ul style="list-style-type: none"> <li>• Age 18 to 28 years</li> <li>• BMI &gt;18.5 kg/m<sup>2</sup> and &lt;30.0 kg/m<sup>2</sup></li> <li>• Total body fat ≤29% for females and ≤19% for males</li> <li>• Regular exercise (moderate to vigorous physical activity for at least 3.5 hours per week)</li> <li>• Regular bowel habit (at least once every two days)</li> <li>• Intake of ≥4 portions of fruit and/or vegetables per day</li> </ul>                                                                                                                                                                                                                                                                                                                                                                                                                                                                                                                                                                                                                                                                                                                                                                                                                                                                                                                                                           |
| <b>Exclusion</b> | <ul style="list-style-type: none"> <li>• Any transmissible viral or bacterial pathogens, or intestinal parasites</li> <li>• Multidrug-resistant organisms (e.g. vancomycin-resistant enterococci, extended-spectrum beta-lactamase-producing Enterobacteriaceae, and carbapenem-resistant Enterobacteriaceae)</li> <li>• Gastrointestinal disease (including symptoms of irritable bowel syndrome, inflammatory bowel disease, or coeliac disease)</li> <li>• Atopic diseases requiring regular prophylaxis or treatment</li> <li>• Current or past history of malignancy</li> <li>• Impaired fasting glucose or impaired glucose tolerance</li> <li>• Type 1 diabetes, type 2 diabetes, or monogenic diabetes</li> <li>• Known dyslipidaemia, hypertension, or metabolic syndrome</li> <li>• Regular use of medications known to influence metabolism or the gut microbiome</li> <li>• Use of oral antibiotics in the past three months</li> <li>• Regular 'binge drinking', i.e. consumption of 5 or more standard drinks of alcohol per session, at least once a week</li> <li>• Any use of recreational drugs or tobacco</li> <li>• Current or past pregnancy</li> <li>• Overseas travel in previous 6 months, except for visits to Australia, UK, USA, Canada, Northern Europe, France, and Germany.</li> <li>• UK residence in 1980–1996 (due to risk of variant Creutzfeldt-Jakob disease)</li> </ul> |

**Table 2.** Inclusion and exclusion criteria for recipients in the Gut Bugs Trial.

---

|                  |                                                                                                                                                                                                                                                                                                                                                                                                                                                                                                                                                                                                                                                                                                                                                                                                                                                         |
|------------------|---------------------------------------------------------------------------------------------------------------------------------------------------------------------------------------------------------------------------------------------------------------------------------------------------------------------------------------------------------------------------------------------------------------------------------------------------------------------------------------------------------------------------------------------------------------------------------------------------------------------------------------------------------------------------------------------------------------------------------------------------------------------------------------------------------------------------------------------------------|
| <b>Inclusion</b> | <ul style="list-style-type: none"><li>• Aged 14 to 18 years</li><li>• BMI <math>\geq 30</math> kg/m<sup>2</sup></li><li>• Post-pubertal (Tanner stage 5)</li></ul>                                                                                                                                                                                                                                                                                                                                                                                                                                                                                                                                                                                                                                                                                      |
| <b>Exclusion</b> | <ul style="list-style-type: none"><li>• Gastrointestinal disease (including inflammatory bowel disease or coeliac disease)</li><li>• Use of regular medications that may influence weight, metabolism, or the gut microbiome (including oral oestrogen-containing contraceptives, antidepressants, glucose-lowering drugs, diet drugs, as well as inhaled, topical, or oral steroids)</li><li>• Consumption of probiotics</li><li>• Type 1 diabetes, type 2 diabetes, or monogenic diabetes</li><li>• Chronic diseases that could affect the primary outcome (other than obesity-related conditions)</li><li>• Food allergies</li><li>• Allergy to macrogol (active ingredient in the bowel preparation product)</li><li>• Allergy to any over-the-counter medication</li><li>• No antibiotic usage for three months prior to trial treatment</li></ul> |

---



**Table 3.** Timing of individual assessments in the Gut Bugs Trial.

|                           |                                                            | Baseline | 6 weeks | 12 weeks | 26 weeks |
|---------------------------|------------------------------------------------------------|----------|---------|----------|----------|
| <b>Clinic</b>             | Medical history and exam                                   | ✓        | ✓       | ✓        | ✓        |
|                           | Anthropometry                                              | ✓        | ✓       | ✓        | ✓        |
|                           | DXA                                                        | ✓        | ✓       | ✓        | ✓        |
|                           | Clinic blood pressure                                      | ✓        | ✓       | ✓        | ✓        |
|                           | 24-h ambulatory blood pressure monitoring                  | ✓        | ✓       | -        | -        |
| <b>Questionnaires</b>     | 3-day dietary record                                       | -        | ✓       | -        | -        |
|                           | NZAFFQ                                                     | ✓        | ✓       | ✓        | ✓        |
|                           | Birmingham IBS                                             | ✓        | ✓       | ✓        | ✓        |
|                           | Bowel movement questionnaire                               | ✓        | ✓       | ✓        | ✓        |
|                           | PedsQL                                                     | ✓        | ✓       | ✓        | ✓        |
|                           | EPOCH                                                      | ✓        | ✓       | ✓        | ✓        |
|                           | IPAQ                                                       | ✓        | ✓       | ✓        | ✓        |
|                           | ASAQ                                                       | ✓        | ✓       | ✓        | ✓        |
| <b>Laboratory</b>         | Matsuda Index                                              | ✓        | ✓       | ✓        | ✓        |
|                           | HOMA-IR                                                    | ✓        | ✓       | ✓        | ✓        |
|                           | HbA1c                                                      | ✓        | ✓       | ✓        | ✓        |
|                           | Fasting lipid profile                                      | ✓        | ✓       | ✓        | ✓        |
|                           | Liver function tests                                       | ✓        | ✓       | ✓        | ✓        |
|                           | hsCRP and uric acid                                        | ✓        | ✓       | ✓        | ✓        |
| <b>Stool bacteriology</b> | Gut microbial composition via 16S rRNA amplicon sequencing | ✓        | ✓       | ✓        | ✓        |
|                           | Metagenome                                                 | ✓        | ✓       | -        | -        |

ASAQ, Adolescent Sedentary Activity Questionnaire; DXA, Dual-energy x-ray absorptiometry; EPOCH, Engagement Perseverance Optimism Connectedness Happiness; HbA1c, glycated haemoglobin; HOMA-IR, homeostasis model assessment of insulin resistance; hsCRP, high-sensitivity C-Reactive Protein; IBS, irritable bowel syndrome; IPAQ, International Physical Activity Questionnaire; NZAFFQ, New Zealand Adolescent food frequency questionnaire; PedsQL, Pediatric Quality of Life Inventory.

**Figure 1.** Diagram showing flow of participants (recipients) in the Gut Bugs Trial.

For peer review only

1  
2  
3  
4  
5  
6  
7  
8  
9  
10  
11  
12  
13  
14  
15  
16  
17  
18  
19  
20  
21  
22  
23  
24  
25  
26  
27  
28  
29  
30  
31  
32  
33  
34  
35  
36  
37  
38  
39  
40  
41  
42  
43  
44  
45  
46  
47  
48  
49  
50  
51  
52  
53  
54  
55  
56  
57  
58  
59  
60



Diagram showing flow of participants (recipients) in the Gut Bugs Trial.

109x99mm (600 x 600 DPI)



SPIRIT 2013 Checklist: Recommended items to address in a clinical trial protocol and related documents\*

| Section/item                      | Item No | Description                                                                                                                                                                                                                                                                              | Addressed on page number                  |
|-----------------------------------|---------|------------------------------------------------------------------------------------------------------------------------------------------------------------------------------------------------------------------------------------------------------------------------------------------|-------------------------------------------|
| <b>Administrative information</b> |         |                                                                                                                                                                                                                                                                                          |                                           |
| Title                             | 1       | Descriptive title identifying the study design, population, interventions, and, if applicable, trial acronym                                                                                                                                                                             | 1                                         |
| Trial registration                | 2a      | Trial identifier and registry name. If not yet registered, name of intended registry                                                                                                                                                                                                     | 2 & 17                                    |
|                                   | 2b      | All items from the World Health Organization Trial Registration Data Set                                                                                                                                                                                                                 | 17                                        |
| Protocol version                  | 3       | Date and version identifier                                                                                                                                                                                                                                                              | To be provided at the time of publication |
| Funding                           | 4       | Sources and types of financial, material, and other support                                                                                                                                                                                                                              | 17                                        |
| Roles and responsibilities        | 5a      | Names, affiliations, and roles of protocol contributors                                                                                                                                                                                                                                  | 1 & 17                                    |
|                                   | 5b      | Name and contact information for the trial sponsor                                                                                                                                                                                                                                       | 17                                        |
|                                   | 5c      | Role of study sponsor and funders, if any, in study design; collection, management, analysis, and interpretation of data; writing of the report; and the decision to submit the report for publication, including whether they will have ultimate authority over any of these activities | 1                                         |
|                                   | 5d      | Composition, roles, and responsibilities of the coordinating centre, steering committee, endpoint adjudication committee, data management team, and other individuals or groups overseeing the trial, if applicable (see Item 21a for data monitoring committee)                         | 13                                        |

**Introduction**

|    |                                                           |     |                                                                                                                                                                                                                                                                                                                                                                                |                   |
|----|-----------------------------------------------------------|-----|--------------------------------------------------------------------------------------------------------------------------------------------------------------------------------------------------------------------------------------------------------------------------------------------------------------------------------------------------------------------------------|-------------------|
| 1  | Background and rationale                                  | 6a  | Description of research question and justification for undertaking the trial, including summary of relevant studies (published and unpublished) examining benefits and harms for each intervention                                                                                                                                                                             | 3 to 5            |
| 2  |                                                           |     |                                                                                                                                                                                                                                                                                                                                                                                |                   |
| 3  |                                                           |     |                                                                                                                                                                                                                                                                                                                                                                                |                   |
| 4  |                                                           | 6b  | Explanation for choice of comparators                                                                                                                                                                                                                                                                                                                                          | 8                 |
| 5  |                                                           |     |                                                                                                                                                                                                                                                                                                                                                                                |                   |
| 6  | Objectives                                                | 7   | Specific objectives or hypotheses                                                                                                                                                                                                                                                                                                                                              | 5                 |
| 7  |                                                           |     |                                                                                                                                                                                                                                                                                                                                                                                |                   |
| 8  | Trial design                                              | 8   | Description of trial design including type of trial (eg, parallel group, crossover, factorial, single group), allocation ratio, and framework (eg, superiority, equivalence, noninferiority, exploratory)                                                                                                                                                                      | 5                 |
| 9  |                                                           |     |                                                                                                                                                                                                                                                                                                                                                                                |                   |
| 10 |                                                           |     |                                                                                                                                                                                                                                                                                                                                                                                |                   |
| 11 |                                                           |     |                                                                                                                                                                                                                                                                                                                                                                                |                   |
| 12 | <b>Methods: Participants, interventions, and outcomes</b> |     |                                                                                                                                                                                                                                                                                                                                                                                |                   |
| 13 |                                                           |     |                                                                                                                                                                                                                                                                                                                                                                                |                   |
| 14 | Study setting                                             | 9   | Description of study settings (eg, community clinic, academic hospital) and list of countries where data will be collected. Reference to where list of study sites can be obtained                                                                                                                                                                                             | 9                 |
| 15 |                                                           |     |                                                                                                                                                                                                                                                                                                                                                                                |                   |
| 16 |                                                           |     |                                                                                                                                                                                                                                                                                                                                                                                |                   |
| 17 | Eligibility criteria                                      | 10  | Inclusion and exclusion criteria for participants. If applicable, eligibility criteria for study centres and individuals who will perform the interventions (eg, surgeons, psychotherapists)                                                                                                                                                                                   | 2, 5 & 6, 22 & 23 |
| 18 |                                                           |     |                                                                                                                                                                                                                                                                                                                                                                                |                   |
| 19 |                                                           |     |                                                                                                                                                                                                                                                                                                                                                                                |                   |
| 20 | Interventions                                             | 11a | Interventions for each group with sufficient detail to allow replication, including how and when they will be administered                                                                                                                                                                                                                                                     | 8                 |
| 21 |                                                           |     |                                                                                                                                                                                                                                                                                                                                                                                |                   |
| 22 |                                                           |     |                                                                                                                                                                                                                                                                                                                                                                                |                   |
| 23 |                                                           | 11b | Criteria for discontinuing or modifying allocated interventions for a given trial participant (eg, drug dose change in response to harms, participant request, or improving/worsening disease)                                                                                                                                                                                 | N/A               |
| 24 |                                                           |     |                                                                                                                                                                                                                                                                                                                                                                                |                   |
| 25 |                                                           |     |                                                                                                                                                                                                                                                                                                                                                                                |                   |
| 26 |                                                           | 11c | Strategies to improve adherence to intervention protocols, and any procedures for monitoring adherence (eg, drug tablet return, laboratory tests)                                                                                                                                                                                                                              | N/A               |
| 27 |                                                           |     |                                                                                                                                                                                                                                                                                                                                                                                |                   |
| 28 |                                                           |     |                                                                                                                                                                                                                                                                                                                                                                                |                   |
| 29 |                                                           |     |                                                                                                                                                                                                                                                                                                                                                                                |                   |
| 30 |                                                           | 11d | Relevant concomitant care and interventions that are permitted or prohibited during the trial                                                                                                                                                                                                                                                                                  | 8                 |
| 31 |                                                           |     |                                                                                                                                                                                                                                                                                                                                                                                |                   |
| 32 | Outcomes                                                  | 12  | Primary, secondary, and other outcomes, including the specific measurement variable (eg, systolic blood pressure), analysis metric (eg, change from baseline, final value, time to event), method of aggregation (eg, median, proportion), and time point for each outcome. Explanation of the clinical relevance of chosen efficacy and harm outcomes is strongly recommended | 14 & 15           |
| 33 |                                                           |     |                                                                                                                                                                                                                                                                                                                                                                                |                   |
| 34 |                                                           |     |                                                                                                                                                                                                                                                                                                                                                                                |                   |
| 35 |                                                           |     |                                                                                                                                                                                                                                                                                                                                                                                |                   |
| 36 |                                                           |     |                                                                                                                                                                                                                                                                                                                                                                                |                   |
| 37 | Participant timeline                                      | 13  | Time schedule of enrolment, interventions (including any run-ins and washouts), assessments, and visits for participants. A schematic diagram is highly recommended (see Figure)                                                                                                                                                                                               | 24                |
| 38 |                                                           |     |                                                                                                                                                                                                                                                                                                                                                                                |                   |
| 39 |                                                           |     |                                                                                                                                                                                                                                                                                                                                                                                |                   |
| 40 |                                                           |     |                                                                                                                                                                                                                                                                                                                                                                                |                   |
| 41 |                                                           |     |                                                                                                                                                                                                                                                                                                                                                                                |                   |
| 42 |                                                           |     |                                                                                                                                                                                                                                                                                                                                                                                |                   |
| 43 |                                                           |     |                                                                                                                                                                                                                                                                                                                                                                                |                   |
| 44 |                                                           |     |                                                                                                                                                                                                                                                                                                                                                                                |                   |
| 45 |                                                           |     |                                                                                                                                                                                                                                                                                                                                                                                |                   |
| 46 |                                                           |     |                                                                                                                                                                                                                                                                                                                                                                                |                   |

|   |             |    |                                                                                                                                                                                       |       |
|---|-------------|----|---------------------------------------------------------------------------------------------------------------------------------------------------------------------------------------|-------|
| 1 | Sample size | 14 | Estimated number of participants needed to achieve study objectives and how it was determined, including clinical and statistical assumptions supporting any sample size calculations | 14    |
| 2 |             |    |                                                                                                                                                                                       |       |
| 3 |             |    |                                                                                                                                                                                       |       |
| 4 | Recruitment | 15 | Strategies for achieving adequate participant enrolment to reach target sample size                                                                                                   | 5 & 6 |
| 5 |             |    |                                                                                                                                                                                       |       |

### 6 **Methods: Assignment of interventions (for controlled trials)**

#### 7 Allocation:

|    |                                  |     |                                                                                                                                                                                                                                                                                                                                                          |       |
|----|----------------------------------|-----|----------------------------------------------------------------------------------------------------------------------------------------------------------------------------------------------------------------------------------------------------------------------------------------------------------------------------------------------------------|-------|
| 10 | Sequence generation              | 16a | Method of generating the allocation sequence (eg, computer-generated random numbers), and list of any factors for stratification. To reduce predictability of a random sequence, details of any planned restriction (eg, blocking) should be provided in a separate document that is unavailable to those who enrol participants or assign interventions | 7     |
| 11 |                                  |     |                                                                                                                                                                                                                                                                                                                                                          |       |
| 12 |                                  |     |                                                                                                                                                                                                                                                                                                                                                          |       |
| 13 |                                  |     |                                                                                                                                                                                                                                                                                                                                                          |       |
| 14 |                                  |     |                                                                                                                                                                                                                                                                                                                                                          |       |
| 15 |                                  |     |                                                                                                                                                                                                                                                                                                                                                          |       |
| 16 | Allocation concealment mechanism | 16b | Mechanism of implementing the allocation sequence (eg, central telephone; sequentially numbered, opaque, sealed envelopes), describing any steps to conceal the sequence until interventions are assigned                                                                                                                                                | 7     |
| 17 |                                  |     |                                                                                                                                                                                                                                                                                                                                                          |       |
| 18 |                                  |     |                                                                                                                                                                                                                                                                                                                                                          |       |
| 19 |                                  |     |                                                                                                                                                                                                                                                                                                                                                          |       |
| 20 | Implementation                   | 16c | Who will generate the allocation sequence, who will enrol participants, and who will assign participants to interventions                                                                                                                                                                                                                                | 7 & 8 |
| 21 |                                  |     |                                                                                                                                                                                                                                                                                                                                                          |       |
| 22 |                                  |     |                                                                                                                                                                                                                                                                                                                                                          |       |
| 23 |                                  |     |                                                                                                                                                                                                                                                                                                                                                          |       |
| 24 | Blinding (masking)               | 17a | Who will be blinded after assignment to interventions (eg, trial participants, care providers, outcome assessors, data analysts), and how                                                                                                                                                                                                                | 7     |
| 25 |                                  |     |                                                                                                                                                                                                                                                                                                                                                          |       |
| 26 |                                  |     |                                                                                                                                                                                                                                                                                                                                                          |       |
| 27 |                                  | 17b | If blinded, circumstances under which unblinding is permissible, and procedure for revealing a participant's allocated intervention during the trial                                                                                                                                                                                                     | 8     |
| 28 |                                  |     |                                                                                                                                                                                                                                                                                                                                                          |       |
| 29 |                                  |     |                                                                                                                                                                                                                                                                                                                                                          |       |
| 30 |                                  |     |                                                                                                                                                                                                                                                                                                                                                          |       |

### 31 **Methods: Data collection, management, and analysis**

|    |                         |     |                                                                                                                                                                                                                                                                                                                                                                                                              |         |
|----|-------------------------|-----|--------------------------------------------------------------------------------------------------------------------------------------------------------------------------------------------------------------------------------------------------------------------------------------------------------------------------------------------------------------------------------------------------------------|---------|
| 33 | Data collection methods | 18a | Plans for assessment and collection of outcome, baseline, and other trial data, including any related processes to promote data quality (eg, duplicate measurements, training of assessors) and a description of study instruments (eg, questionnaires, laboratory tests) along with their reliability and validity, if known. Reference to where data collection forms can be found, if not in the protocol | 9 to 13 |
| 34 |                         |     |                                                                                                                                                                                                                                                                                                                                                                                                              |         |
| 35 |                         |     |                                                                                                                                                                                                                                                                                                                                                                                                              |         |
| 36 |                         |     |                                                                                                                                                                                                                                                                                                                                                                                                              |         |
| 37 |                         |     |                                                                                                                                                                                                                                                                                                                                                                                                              |         |
| 38 |                         |     |                                                                                                                                                                                                                                                                                                                                                                                                              |         |
| 39 |                         | 18b | Plans to promote participant retention and complete follow-up, including list of any outcome data to be collected for participants who discontinue or deviate from intervention protocols                                                                                                                                                                                                                    | 9       |
| 40 |                         |     |                                                                                                                                                                                                                                                                                                                                                                                                              |         |
| 41 |                         |     |                                                                                                                                                                                                                                                                                                                                                                                                              |         |
| 42 |                         |     |                                                                                                                                                                                                                                                                                                                                                                                                              |         |

|    |                                 |     |                                                                                                                                                                                                                                                                                                                                       |         |
|----|---------------------------------|-----|---------------------------------------------------------------------------------------------------------------------------------------------------------------------------------------------------------------------------------------------------------------------------------------------------------------------------------------|---------|
| 1  | Data management                 | 19  | Plans for data entry, coding, security, and storage, including any related processes to promote data quality (eg, double data entry; range checks for data values). Reference to where details of data management procedures can be found, if not in the protocol                                                                     | 14      |
| 2  |                                 |     |                                                                                                                                                                                                                                                                                                                                       |         |
| 3  |                                 |     |                                                                                                                                                                                                                                                                                                                                       |         |
| 4  |                                 |     |                                                                                                                                                                                                                                                                                                                                       |         |
| 5  | Statistical methods             | 20a | Statistical methods for analysing primary and secondary outcomes. Reference to where other details of the statistical analysis plan can be found, if not in the protocol                                                                                                                                                              | 14 & 15 |
| 6  |                                 |     |                                                                                                                                                                                                                                                                                                                                       |         |
| 7  |                                 |     |                                                                                                                                                                                                                                                                                                                                       |         |
| 8  |                                 | 20b | Methods for any additional analyses (eg, subgroup and adjusted analyses)                                                                                                                                                                                                                                                              | 15      |
| 9  |                                 |     |                                                                                                                                                                                                                                                                                                                                       |         |
| 10 |                                 | 20c | Definition of analysis population relating to protocol non-adherence (eg, as randomised analysis), and any statistical methods to handle missing data (eg, multiple imputation)                                                                                                                                                       | 15      |
| 11 |                                 |     |                                                                                                                                                                                                                                                                                                                                       |         |
| 12 |                                 |     |                                                                                                                                                                                                                                                                                                                                       |         |
| 13 |                                 |     |                                                                                                                                                                                                                                                                                                                                       |         |
| 14 | <b>Methods: Monitoring</b>      |     |                                                                                                                                                                                                                                                                                                                                       |         |
| 15 |                                 |     |                                                                                                                                                                                                                                                                                                                                       |         |
| 16 | Data monitoring                 | 21a | Composition of data monitoring committee (DMC); summary of its role and reporting structure; statement of whether it is independent from the sponsor and competing interests; and reference to where further details about its charter can be found, if not in the protocol. Alternatively, an explanation of why a DMC is not needed | 13      |
| 17 |                                 |     |                                                                                                                                                                                                                                                                                                                                       |         |
| 18 |                                 |     |                                                                                                                                                                                                                                                                                                                                       |         |
| 19 |                                 |     |                                                                                                                                                                                                                                                                                                                                       |         |
| 20 |                                 |     |                                                                                                                                                                                                                                                                                                                                       |         |
| 21 |                                 |     |                                                                                                                                                                                                                                                                                                                                       |         |
| 22 |                                 | 21b | Description of any interim analyses and stopping guidelines, including who will have access to these interim results and make the final decision to terminate the trial                                                                                                                                                               | N/A     |
| 23 |                                 |     |                                                                                                                                                                                                                                                                                                                                       |         |
| 24 |                                 |     |                                                                                                                                                                                                                                                                                                                                       |         |
| 25 | Harms                           | 22  | Plans for collecting, assessing, reporting, and managing solicited and spontaneously reported adverse events and other unintended effects of trial interventions or trial conduct                                                                                                                                                     | 13      |
| 26 |                                 |     |                                                                                                                                                                                                                                                                                                                                       |         |
| 27 |                                 |     |                                                                                                                                                                                                                                                                                                                                       |         |
| 28 | Auditing                        | 23  | Frequency and procedures for auditing trial conduct, if any, and whether the process will be independent from investigators and the sponsor                                                                                                                                                                                           | N/A     |
| 29 |                                 |     |                                                                                                                                                                                                                                                                                                                                       |         |
| 30 |                                 |     |                                                                                                                                                                                                                                                                                                                                       |         |
| 31 |                                 |     |                                                                                                                                                                                                                                                                                                                                       |         |
| 32 | <b>Ethics and dissemination</b> |     |                                                                                                                                                                                                                                                                                                                                       |         |
| 33 |                                 |     |                                                                                                                                                                                                                                                                                                                                       |         |
| 34 | Research ethics approval        | 24  | Plans for seeking research ethics committee/institutional review board (REC/IRB) approval                                                                                                                                                                                                                                             | 16      |
| 35 |                                 |     |                                                                                                                                                                                                                                                                                                                                       |         |
| 36 |                                 |     |                                                                                                                                                                                                                                                                                                                                       |         |
| 37 | Protocol amendments             | 25  | Plans for communicating important protocol modifications (eg, changes to eligibility criteria, outcomes, analyses) to relevant parties (eg, investigators, REC/IRBs, trial participants, trial registries, journals, regulators)                                                                                                      | 16      |
| 38 |                                 |     |                                                                                                                                                                                                                                                                                                                                       |         |
| 39 |                                 |     |                                                                                                                                                                                                                                                                                                                                       |         |
| 40 |                                 |     |                                                                                                                                                                                                                                                                                                                                       |         |
| 41 |                                 |     |                                                                                                                                                                                                                                                                                                                                       |         |
| 42 |                                 |     |                                                                                                                                                                                                                                                                                                                                       |         |

|    |                               |     |                                                                                                                                                                                                                                                                                     |         |
|----|-------------------------------|-----|-------------------------------------------------------------------------------------------------------------------------------------------------------------------------------------------------------------------------------------------------------------------------------------|---------|
| 1  | Consent or assent             | 26a | Who will obtain informed consent or assent from potential trial participants or authorised surrogates, and how (see Item 32)                                                                                                                                                        | 6       |
| 2  |                               |     |                                                                                                                                                                                                                                                                                     |         |
| 3  |                               |     |                                                                                                                                                                                                                                                                                     |         |
| 4  |                               | 26b | Additional consent provisions for collection and use of participant data and biological specimens in ancillary studies, if applicable                                                                                                                                               | N/A     |
| 5  |                               |     |                                                                                                                                                                                                                                                                                     |         |
| 6  |                               |     |                                                                                                                                                                                                                                                                                     |         |
| 7  | Confidentiality               | 27  | How personal information about potential and enrolled participants will be collected, shared, and maintained in order to protect confidentiality before, during, and after the trial                                                                                                | 6       |
| 8  |                               |     |                                                                                                                                                                                                                                                                                     |         |
| 9  |                               |     |                                                                                                                                                                                                                                                                                     |         |
| 10 | Declaration of interests      | 28  | Financial and other competing interests for principal investigators for the overall trial and each study site                                                                                                                                                                       | 1       |
| 11 |                               |     |                                                                                                                                                                                                                                                                                     |         |
| 12 |                               |     |                                                                                                                                                                                                                                                                                     |         |
| 13 | Access to data                | 29  | Statement of who will have access to the final trial dataset, and disclosure of contractual agreements that limit such access for investigators                                                                                                                                     | 14      |
| 14 |                               |     |                                                                                                                                                                                                                                                                                     |         |
| 15 |                               |     |                                                                                                                                                                                                                                                                                     |         |
| 16 | Ancillary and post-trial care | 30  | Provisions, if any, for ancillary and post-trial care, and for compensation to those who suffer harm from trial participation                                                                                                                                                       | 13      |
| 17 |                               |     |                                                                                                                                                                                                                                                                                     |         |
| 18 |                               |     |                                                                                                                                                                                                                                                                                     |         |
| 19 |                               |     |                                                                                                                                                                                                                                                                                     |         |
| 20 | Dissemination policy          | 31a | Plans for investigators and sponsor to communicate trial results to participants, healthcare professionals, the public, and other relevant groups (eg, via publication, reporting in results databases, or other data sharing arrangements), including any publication restrictions | 16 & 17 |
| 21 |                               |     |                                                                                                                                                                                                                                                                                     |         |
| 22 |                               |     |                                                                                                                                                                                                                                                                                     |         |
| 23 |                               |     |                                                                                                                                                                                                                                                                                     |         |
| 24 |                               | 31b | Authorship eligibility guidelines and any intended use of professional writers                                                                                                                                                                                                      | N/A     |
| 25 |                               |     |                                                                                                                                                                                                                                                                                     |         |
| 26 |                               | 31c | Plans, if any, for granting public access to the full protocol, participant-level dataset, and statistical code                                                                                                                                                                     | N/A     |
| 27 |                               |     |                                                                                                                                                                                                                                                                                     |         |
| 28 |                               |     |                                                                                                                                                                                                                                                                                     |         |
| 29 | <b>Appendices</b>             |     |                                                                                                                                                                                                                                                                                     |         |
| 30 |                               |     |                                                                                                                                                                                                                                                                                     |         |
| 31 | Informed consent materials    | 32  | Model consent form and other related documentation given to participants and authorised surrogates                                                                                                                                                                                  | N/A     |
| 32 |                               |     |                                                                                                                                                                                                                                                                                     |         |
| 33 |                               |     |                                                                                                                                                                                                                                                                                     |         |
| 34 | Biological specimens          | 33  | Plans for collection, laboratory evaluation, and storage of biological specimens for genetic or molecular analysis in the current trial and for future use in ancillary studies, if applicable                                                                                      | N/A     |
| 35 |                               |     |                                                                                                                                                                                                                                                                                     |         |
| 36 |                               |     |                                                                                                                                                                                                                                                                                     |         |

37 \*It is strongly recommended that this checklist be read in conjunction with the SPIRIT 2013 Explanation & Elaboration for important clarification on the items.  
 38 Amendments to the protocol should be tracked and dated. The SPIRIT checklist is copyrighted by the SPIRIT Group under the Creative Commons  
 39 "[Attribution-NonCommercial-NoDerivs 3.0 Unported](https://creativecommons.org/licenses/by-nc-nd/3.0/)" license.  
 40  
 41  
 42
